# Supplementary material for: Micelle-enabled clean and selective sulfonylation of polyfluoroarenes in water under mild conditions
Source: Royal Society of Chemistry journal article supplement (doi:10.1039/c7gc03514d), 2018-01-01

# Micelle-Enabled Clean and Selective Sulfonation of Polyfluoroarenes in Water Under Mild Conditions

Justin D. Smith,<sup>a</sup> Tharique N. Ansari,<sup>a</sup> Martin P. Andersson,<sup>b</sup> Yadagiri Dongari,<sup>a</sup> Faisal Ibrahim,<sup>a</sup> Shengzong Liang,<sup>a</sup> Gerald B. Hammond,<sup>a</sup> Fabrice Gallou,<sup>c</sup> Sachin Handa,<sup>a\*</sup>

<sup>a</sup>Department of Chemistry, University of Louisville, Louisville, KY 40292

<sup>b</sup>Nano-Science Center, Department of Chemistry, University of Copenhagen (Denmark)

<sup>c</sup>Novartis Pharma AG, Basel CH-4002 Switzerland.

\*sachin.handa@louisville.edu

## Supporting Information

| <u>Contents</u>                                                      | <u>Page</u> |
|----------------------------------------------------------------------|-------------|
| 1. General Experimental Details                                      | S2          |
| 2. Optimization                                                      | S3-S4       |
| 3. Final Optimized General Procedure                                 | S5          |
| 4. Substrate Scope                                                   | S6          |
| 5. Gram-Scale Reaction                                               | S7          |
| 6. Synthesis of Polymer of Intrinsic Miroporosity                    | S8          |
| 7. Recycle Study                                                     | S9-S11      |
| 8. Dynamic Light Scattering Experiments                              | S12         |
| 9. Cryo-TEM                                                          | S13         |
| 10. Computational Details                                            | S14         |
| 11. Analytical Data                                                  | S15-S26     |
| 12. References                                                       | S27         |
| 13. <sup>1</sup> H, <sup>13</sup> C, and <sup>19</sup> F NMR Spectra | S28-S104    |

## **1. General Experimental Details**

All manipulations were carried out under air unless otherwise noted. TLC plates (UV 254 indicator, aluminum backed, 175–225  $\mu\text{m}$  thickness, standard grade silica gel, 230–400 mesh) were purchased from Merck. Acetone, ethyl acetate, and hexanes were purchased from Fisher Scientific. NMR solvents were purchased from Cambridge Isotopes Laboratories. Sulfinate salts were either purchased from Sigma-Aldrich or their precursors were obtained as a gift from Novartis Pharma Basel. All compounds were purified either by simple filtration with water washing, by passing through a silica plug, or by flash chromatography using a Teledyne Isco CombiFlash Rf 150. Microwave reaction vials (4 mL volume) were purchased from Biotage. HPLC grade water was used to prepare surfactant solution. GCMS data was recorded using a Thermo Scientific Trace 1300 Gas Chromatograph coupled with a Thermo Scientific ISQ-QD Single Quadrupole Mass Spectrometer. Melting points were determined using a Thomas Hoover melting point apparatus with samples in Kimble Kimex 51 capillaries (1.5–1.8 x 90 mm). NMR spectra were recorded at 23 °C on Varian MR-400, Varian Unity INOVA 500, and Varian VNMRS 700 spectrometers (400, 500 and 700 MHz, respectively). Reported chemical shifts are referenced to residual solvent peaks. IR spectra were acquired on a FTIR Perkin Elmer Spectrum Two: UATR Two spectrometer using 1  $\text{cm}^{-1}$  resolution. High resolution mass analyses were obtained either using a 5975C Mass Selective Detector coupled with a 7890A Gas Chromatograph (Agilent Technologies) or orbit-trap. Calibrated MALDI mass measurements were conducted on an Applied Biosystems Voyager System 6032. DLS analyses were performed on Brookhaven 90 Plus Particle Size Analyzer

## 2. Optimization

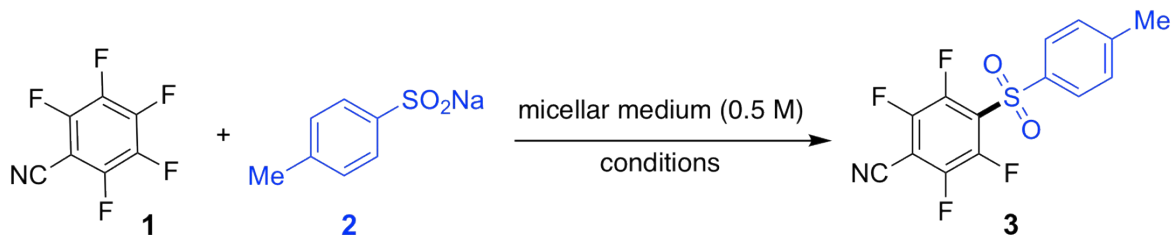

| entry | reaction medium                    | additive         | yield (%) <sup>#</sup> |
|-------|------------------------------------|------------------|------------------------|
| 1     | acetone                            | –                | 52                     |
| 2     | water                              | –                | 0                      |
| 3     | 3 wt% FI-750-M/acetone (4:1)       | –                | 9                      |
| 4     | water/acetone (4:1)                | –                | 5                      |
| 5     | 3 wt% FI-750-M/acetone (4:1)       | NaCl (5 equiv.)  | 58                     |
| 6     | 3 wt% FI-750-M/acetone (4:1)       | NaCl (10 equiv.) | 80                     |
| 7     | water                              | NaCl (10 equiv.) | 0                      |
| 8     | 3 wt% FI-750-M                     | NaCl (10 equiv.) | 57                     |
| 9     | 3 wt% FI-750-M/THF (4:1)           | NaCl (10 equiv.) | 57                     |
| 10    | 3 wt% FI-750-M/DMSO (4:1)          | NaCl (10 equiv.) | 70                     |
| 11    | 3 wt% FI-750-M/acetone (4:1)       | NaF (10 equiv.)  | 9                      |
| 12    | 3 wt% FI-750-M/acetone (4:1)       | NaBr (10 equiv.) | 38                     |
| 13    | 3 wt% TPGS-750-M/acetone (4:1)     | NaCl (10 equiv.) | 48                     |
| 14    | 3 wt% SDS/acetone (4:1)            | NaCl (10 equiv.) | 1                      |
| 15    | 3 wt% Pluronic F-127/acetone (4:1) | NaCl (10 equiv.) | 26                     |
| 16    | 3 wt% Tween 20/acetone (4:1)       | NaCl (10 equiv.) | 52                     |
| 17    | water/acetone (4:1)                | NaCl (10 equiv.) | 18                     |

Conditions: **1** (0.5 mmol), **2** (0.6 mmol), additive (5 mmol), aqueous surfactant (0.8 mL), 0.2 mL acetone, rt (23 °C), 4 h. <sup>#</sup>Isolated yields.

**Method for optimization studies.** Sodium *p*-toluenesulfinate salt (0.6 mmol, 1.2 equiv.) and additive were added to an oven-dried 4 mL microwave vial equipped with PTFE-coated magnetic

stir bars. Subsequently, the reaction medium was added, followed by the pentafluorobenzonitrile (0.5 mmol, 1.0 equiv.). The reaction vessel was fitted with a rubber septum which was then wrapped with Teflon tape. The reaction mixture was allowed to stir at room temperature. Reaction progress was monitored at 30 minutes by withdrawing a 20  $\mu$ L aliquot, passing it through a short silica plug with ethyl acetate, and immediately subjecting the eluted solution to GCMS analysis. After 4 hours had elapsed from the addition of pentafluorobenzonitrile, the septum was removed, and the reaction mixture was extracted with 1 mL portions of ethyl acetate (typically 3 extractions). The combined organic layers were dried over anhydrous  $\text{MgSO}_4$ , diluted with an equal volume of hexanes, and passed through a silica plug using a 1:1 mixture of hexanes and ethyl acetate as eluent. Solvent was removed by rotary evaporation and the containing vessel was placed under high vacuum for 2 hours.

### Optimal equivalents of sulfinate salt

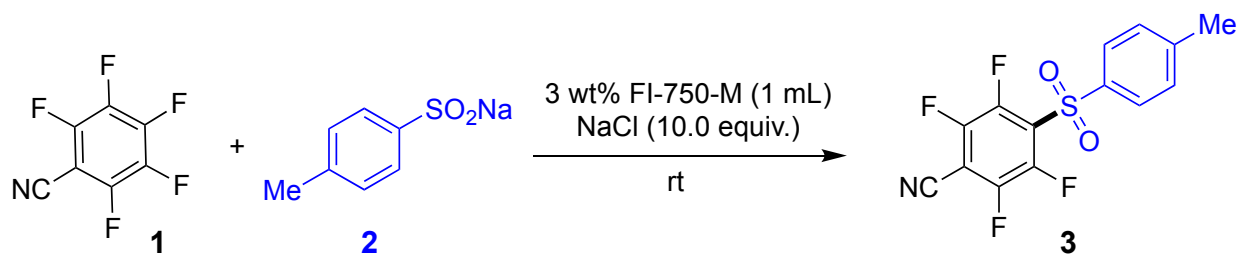

| entry | <b>2</b> (equiv.) | yield (%) <sup>*</sup> |
|-------|-------------------|------------------------|
| 1     | 1.0               | 81                     |
| 2     | 2.0               | 81                     |
| 3     | 3.0               | 85                     |

**Conditions:** **1** (0.5 mmol), sodium arylsulfinate **2**, NaCl (10 equiv.), 0.2 mL acetone, 0.8 mL 3 wt% aq. FI-750-M, rt, 14 h; <sup>\*</sup>isolated yield. Product was extracted with ethyl acetate in entries 2 and 3 since it was not appeared as filterable solid.

### 3. Final Optimized General Procedure

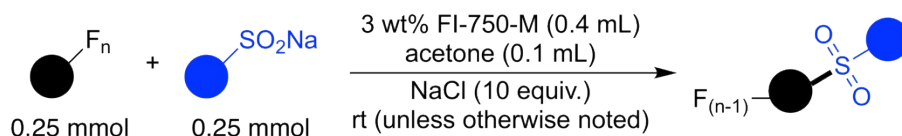

Aryl/heteroarylsulfinate salt (0.25 mmol) and sodium chloride (2.5 mmol) were sequentially added to an oven-dried 4 mL microwave reaction vial equipped with a PTFE-coated magnetic stir bar. Subsequently, 3 wt% aqueous FI-750-M (0.4 mL) and acetone (0.1 mL) were added, followed by addition of the polyfluoroarene (0.25 mmol). The reaction vessel was closed with a rubber septum which was then wrapped with PTFE tape. The reaction mixture was allowed to stir at room temperature. Reaction progress was monitored by TLC and GCMS. Upon reaction completion, most of the products appeared as solids inside the reaction vial. Therefore, 1.0 mL deionized water was added to the reaction mixture and contents were stirred for a minute. Reaction mixture was centrifuged to separate the solid from the liquid layer. Liquid layer was decanted and solid was washed an additional two times with water to obtain pure product. Pure product was dried under reduced pressure before final analyses.

Note: In a few cases (**16**, **26**), the product appeared partly soluble, so the mixture was extracted with ethyl acetate (2 x 0.5 mL), and the contents of the combined organic layers were passed through a hexane-wetted plug of silica gel. Volatiles were evaporated to obtain pure product as a solid.

## 4. Substrate Scope

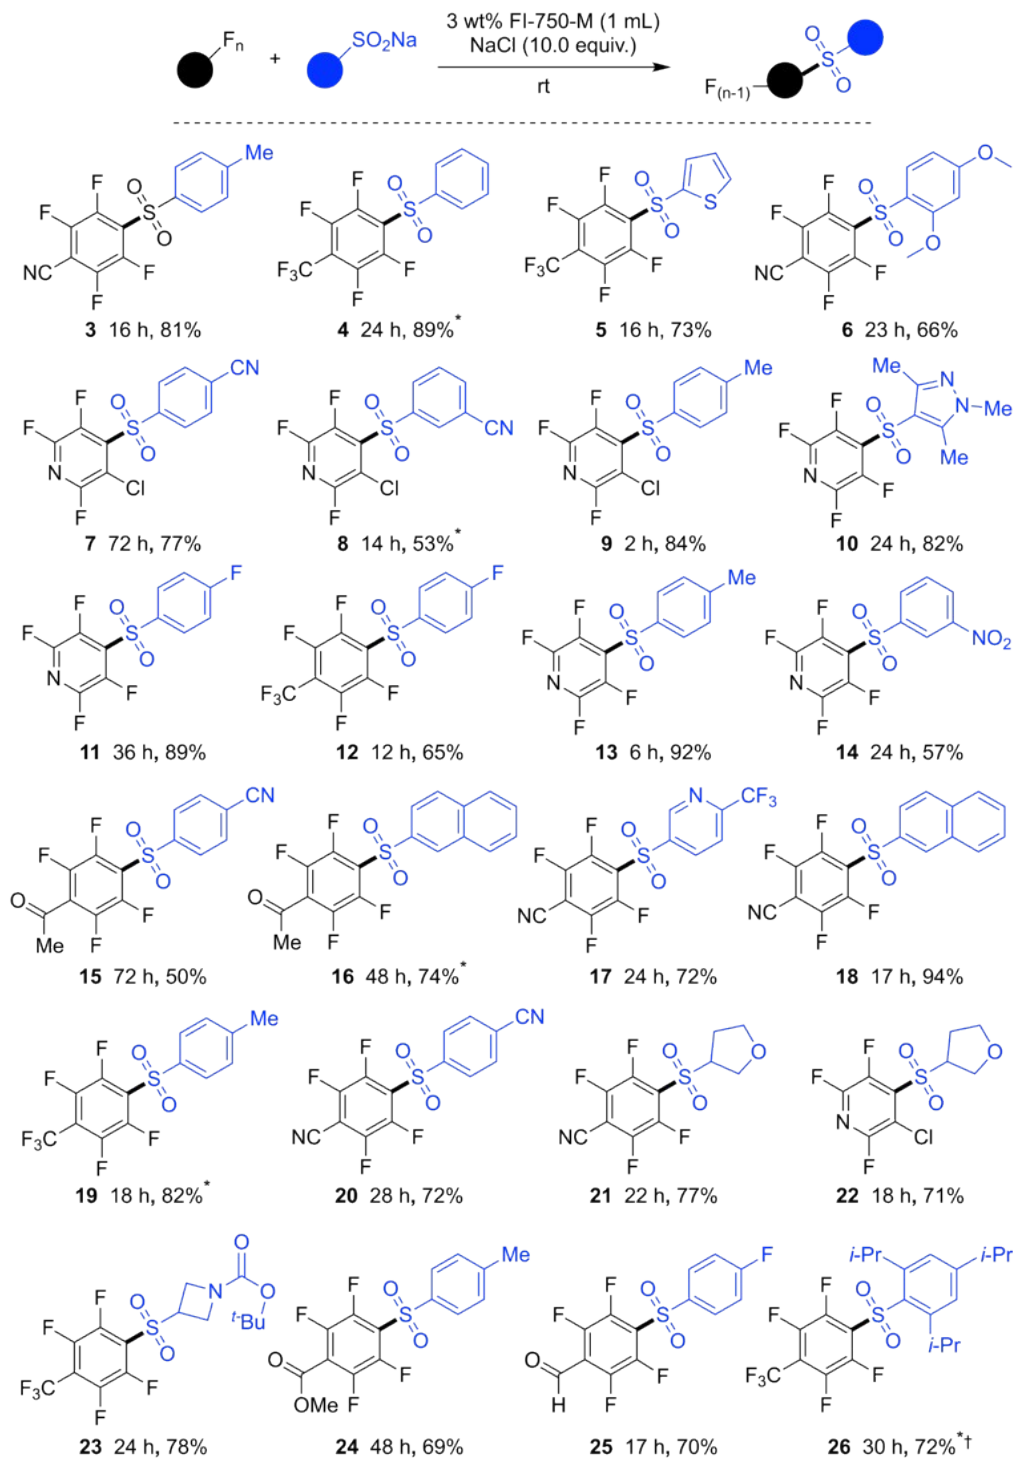

**Conditions:** polyfluoroaryl (0.25 mmol), sodium arylsulfinate (0.25 mmol), NaCl (10 equiv.), 0.1 mL acetone, 0.4 mL 3 wt% aq. FI-750-M; \*yields with reaction temperature 45 °C; †lithium sulfinate salt was used.

## 5. Gram-Scale Reaction

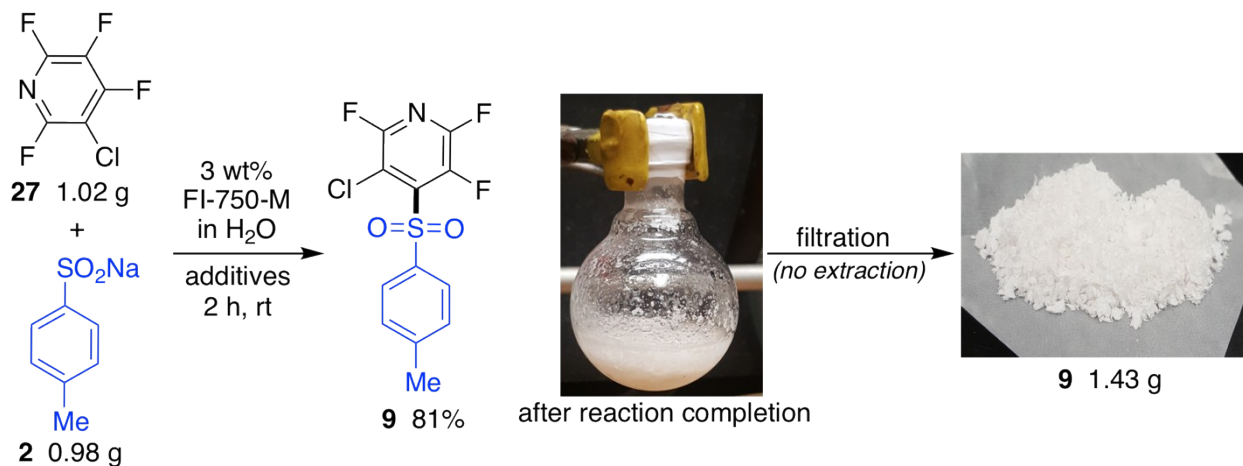

Sodium *p*-toluenesulfonate **2** (5.5 mmol) and sodium chloride (55 mmol) were added to an oven-dried 25 mL round bottom flask equipped with a PTFE-coated magnetic stirrer bar. Subsequently, 3 wt% aqueous FI-750-M (8 mL) and acetone (2 mL) were added, followed by the addition of polyfluoroarene **27**. The reaction vessel was fitted with a rubber septum which was then wrapped with PTFE tape, and the reaction mixture was allowed to stir at room temperature. Reaction progress was monitored by TLC and GCMS. Upon reaction completion (after 2 h), 10 mL deionized water was added, and the solid material was collected by vacuum filtration with deionized water rinsing (2 x 10 mL). Residual traces of water were removed under high vacuum and the product was obtained as 1.43 g (81%) of white flaky solid. <sup>1</sup>H NMR confirmed purity and matched the product obtained from the 0.25 mmol scale reaction as shown in the substrate scope table.

## 6. Synthesis of Polymer of Intrinsic Miroporosity

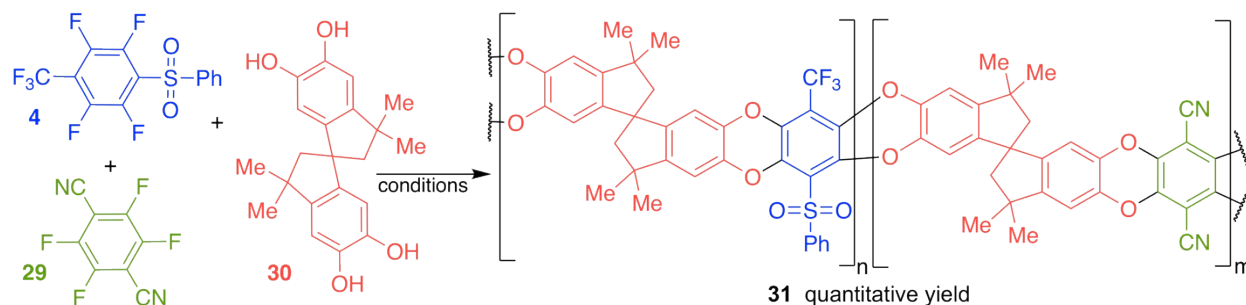

Conditions: **4** (0.28 mmol, 1.0 equiv.), **29** (0.56 mmol, 2.0 equiv.), **30** (0.84 mmol, 3.0 equiv.),  $K_2CO_3$  (2.8 mmol, 10 equiv.), 10 mL 3 wt% aqueous FI-750-M, reflux.

1,2,4,5-Tetrafluoro-3-(phenylsulfonyl)-6-(trifluoromethyl)benzene (0.28 mmol, 1.0 equiv.), 2,3,5,6-tetrafluoroterephthalonitrile (0.56 mmol, 2.0 equiv.), 3,3',3',3'-tetramethyl-2,2',3,3'-tetrahydro-1,1'-spirobi[indene]-5,5',6,6'-tetraol (0.84 mmol, 3.0 equiv.), and potassium carbonate (2.8 mmol, 10 equiv.) were added to an oven-dried 50 mL round bottom flask equipped with a PTFE-coated magnetic stir bar, followed by addition of 10 mL 3 wt% aqueous FI-750-M. The reaction vessel was fitted with a water-jacketed reflux condenser and was magnetically stirred in an oil bath pre-heated to 125 °C. Product formation was observed as a yellow precipitate. After 2 h, the reaction vessel was removed from heating and the solid material was collected over a fritted glass funnel by vacuum filtration with subsequent water rinses (3 x 10 mL). The solid material and 20 mL deionized water were added to a 50 mL round bottom flask which was then fitted with a water-jacketed reflux condenser. The suspension was then magnetically stirred in an oil bath pre-heated to 100 °C for 16 hours, at which point the vessel was allowed to cool to room temperature, and the solid material was thereafter collected by vacuum filtration on a fritted glass funnel. Residual traces of water were removed under high vacuum and the product was obtained as 0.33 g (87%) of yellow solid. Analytical data was in accordance with the literature.<sup>[1]</sup>



## 7. Recycle Study

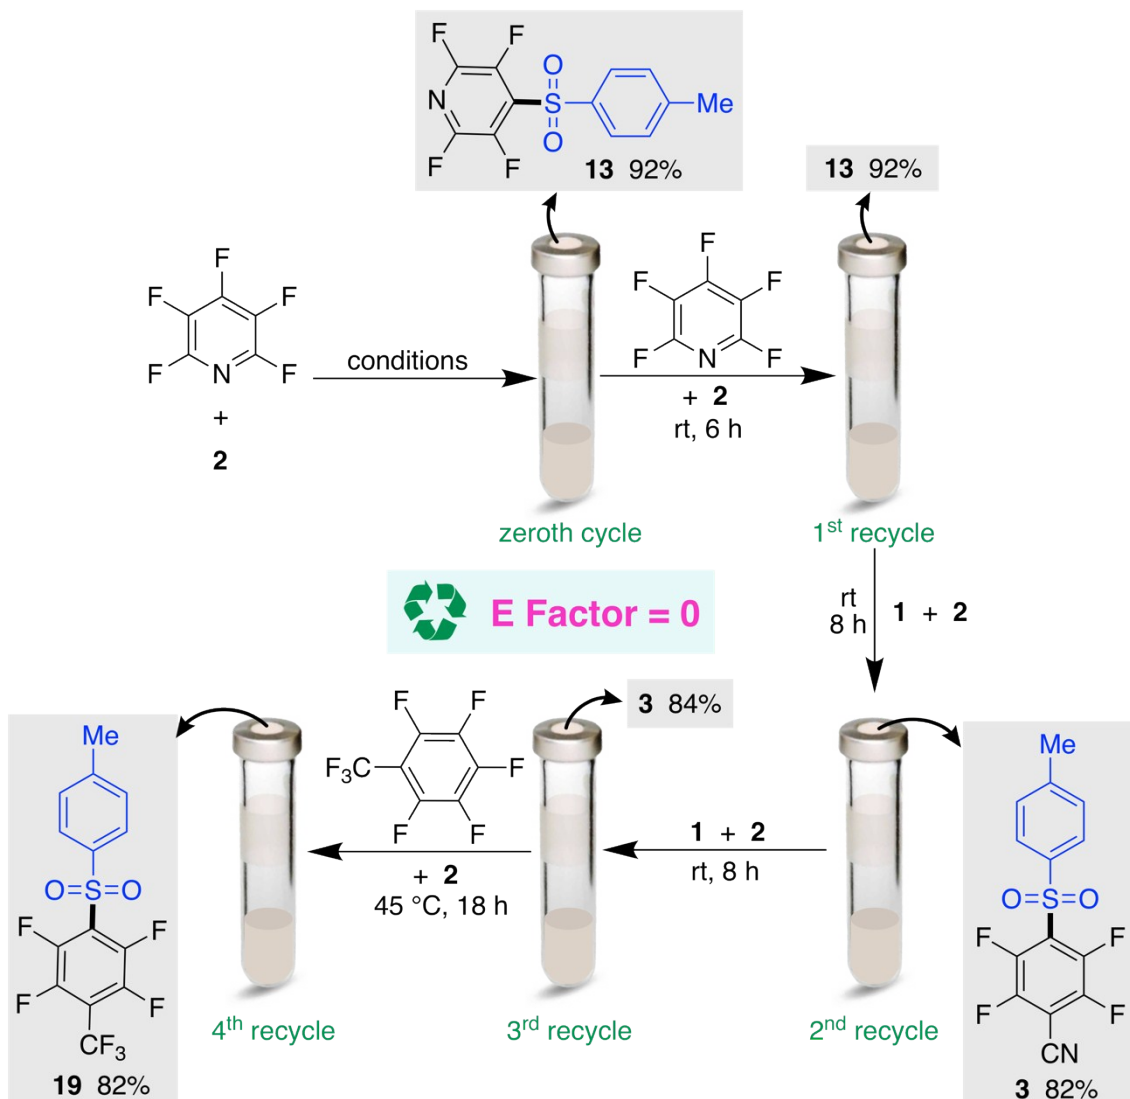

Conditions: perfluoroarene (0.25 mmol), aryl sodium sulfinate (0.25 mmol), NaCl (2.5 mmol, only in zeroth cycle), acetone (0.1 mL, only in zeroth cycle), 3 wt% aqueous FI-750-M (0.4 mL, only in zeroth cycle), rt (unless otherwise noted), 6 h (unless otherwise noted).

**Zeroth cycle.** Sodium *p*-toluenesulfinate salt (0.25 mmol) and sodium chloride (2.5 mmol) were added to an oven-dried stir-bar-equipped 4 mL microwave vial. Subsequently, a mixture of 3 wt% aqueous FI-750-M (0.4 mL) and acetone (0.1 mL) was added (this mixture had been recovered from the gram-scale reaction), followed by addition of pentafluoropyridine (0.25 mmol). The reaction vessel was fitted with a rubber septum which was then wrapped with PTFE tape. The

reaction mixture was allowed to stir at room temperature. Rather than monitoring, the reaction was allowed to run for a set time of 6 hours (based on the reaction completion time of an equivalent reaction set up and monitored previously). Upon reaction completion, the liquid was removed from the precipitate by syringe and transferred to a different vessel that had been prepared for the next iteration in the study. The precipitate was rinsed with water (2 x 0.5 mL), with the water being removed by syringe. Residual traces of water were removed under reduced pressure at 80 °C, and the precipitate was subsequently placed under high vacuum. The pure product **13** was obtained as a white flaky solid (71 mg, 92%), as confirmed by <sup>1</sup>H NMR.

**First recycle.** The aqueous micellar portion recovered from the above reaction (zeroth cycle) mixture was added to an oven-dried stir-bar-equipped 4 mL microwave vial containing sodium *p*-toluenesulfinate salt (0.25 mmol). Pentafluoropyridine (0.25 mmol) was added, and the reaction vessel was fitted with a rubber septum which was then wrapped with PTFE tape. The reaction mixture was allowed to stir at room temperature for 6 hours. Upon reaction completion, the liquid was removed from the precipitate by syringe and transferred to a different vessel that had been prepared for the next iteration in the study. The precipitate was rinsed and dried as in the zeroth cycle. The product was obtained as a white flaky solid (72 mg, 92%), as confirmed by <sup>1</sup>H NMR.

**Second recycle** The method for the second recycle was identical to that of the first recycle, except that pentafluorobenzonitrile (0.25 mmol) was used in place of pentafluoropyridine, and the reaction was allowed to run for 8 hours. The product was obtained as an off-white flaky solid (67 mg, 82%), as confirmed by <sup>1</sup>H NMR.

**Third recycle.** The method for the third recycle was identical to that of the second recycle. The product was obtained as an off-white flaky solid (69 mg, 84%), as confirmed by  $^1\text{H}$  NMR. Note: 5.0 equiv. of NaCl was added as additive.

**Fourth recycle.** The method for the fourth recycle was identical to that of the first recycle, except that octafluorotoluene (0.25 mmol) was used in place of pentafluoropyridine, and the reaction was allowed to run for 18 hours at 45 °C. The product was obtained as an off-white flaky solid (76 mg, 82%), as confirmed by  $^1\text{H}$  NMR.

## **8. Dynamic Light Scattering Experiments**

Particle size measurements were acquired with a Brookhaven 90 Plus Particle Size Analyzer from Brookhaven Instrument Corporation. A 0.2 wt% aqueous solution of FI-750-M was analyzed for particle size distribution. In a separate experiment, 20% (w/v) of acetone was dissolved in 0.2 wt% aqueous solution of FI-750-M and NaCl was admixed to obtain its 1M concentration. After mixing for 5 minutes, resulting solution was immediately analyzed for particle size determination.

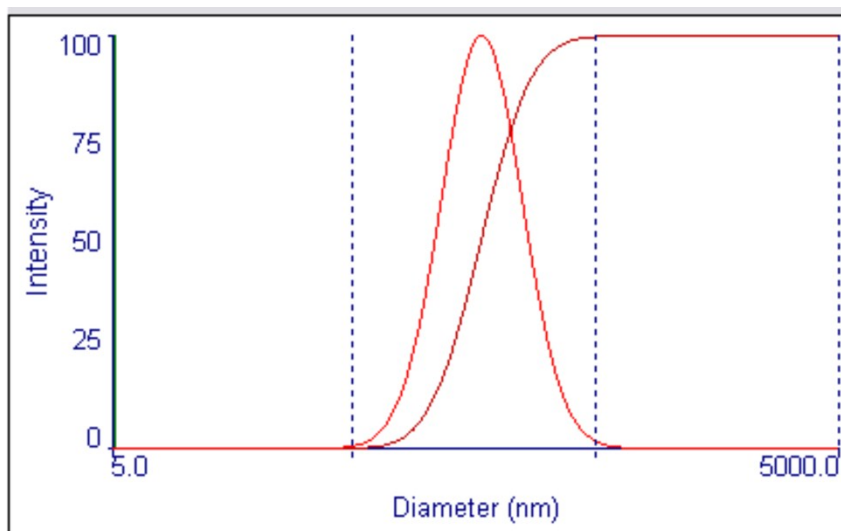

0.2 wt% aqueous FI-750-M – average diameter = 169 nm

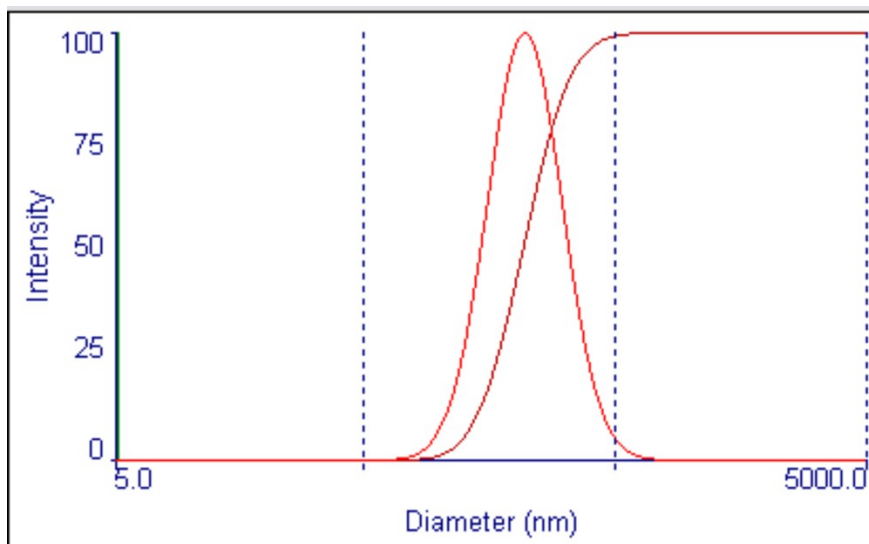

0.2 wt% aqueous FI-750-M, 1M NaCl, 20% acetone – average diameter = 169 nm

## **9. Cryo-TEM**

Cryo-TEM analysis was performed in the Facility of High Resolution Microscopy, California Nanoscience Institute, University of California, Santa Barbara. Two different samples were directly analyzed for high resolution images to determine the particle size, shape, and morphology: a) 3 wt% aqueous FI-750-M and b) 1 M NaCl in 3 wt% aqueous FI-750-M, 20 vol% acetone solution.

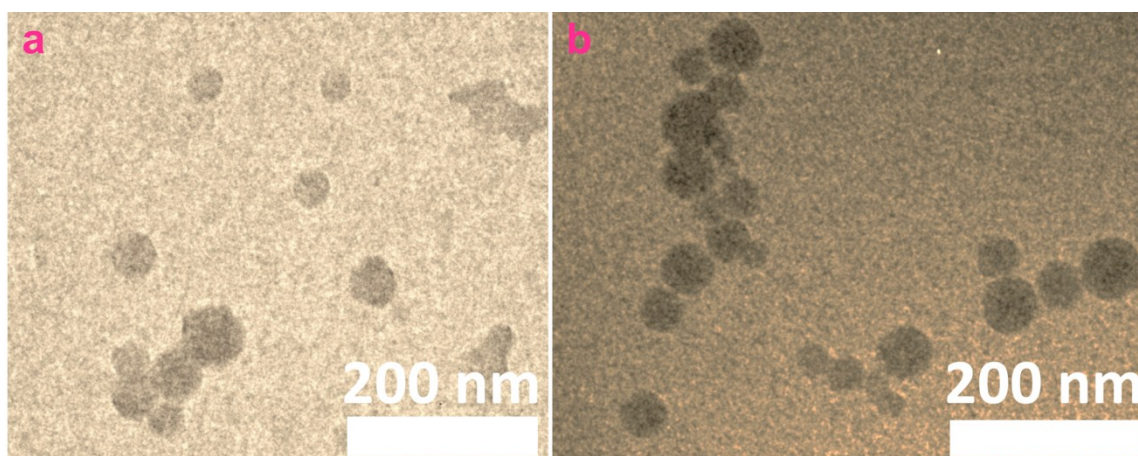

## **10. Computational Details**

The density functional theory calculations were carried out using Turbomole <sup>[2]</sup>, v6.5, with the BP functional<sup>[3]</sup>, the TZVP basis set<sup>[4]</sup>, and the COSMO implicit solvent model<sup>[5]</sup> with an infinite dielectric constant, which is required for the subsequent COSMO-RS calculations<sup>[6]</sup>. The COSMO-RS calculations used the BP-TZVP-C1601 parameterization<sup>[7]</sup> in the COSMOtherm<sup>[8]</sup> program. Predictions of interfacial tension (IFT) were made using the model by Andersson, et.al<sup>[9]</sup>, using the slightly updated version of the method with geometric averaging of coverages during the IFT iterations<sup>[10]</sup>. For estimating local solubilities for the different parts of the surfactant, we used the weight factor functionality in COSMOtherm to model the mPEG region, the lipophilic region and the linker region of the FI-750-M and the TPGS-750-M surfactants as different molecules. The non-iterative procedure for calculating solubility was used, because the iterative procedure gave inconsistent results for the perfluoroarene compound. Four different conformers were used for the FI-750-M surfactant with 16 ethylene oxide units to take into account surfactant flexibility and three different conformers were used for the TPGS-750-M surfactant, also with 16 ethylene oxide units. For the interfacial tension model to be reliable, neutral molecules are needed. Therefore, we only modeled the ion pair form of the sodium arylsulfinate **2**. The salts NaF, NaCl and NaBr were also as neutral ion pairs.

## 11. Analytical Data

### **2,3,5,6-tetrafluoro-4-tosylbenzonitrile (3)**

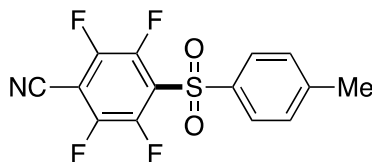

White solid, mp = 156–157 °C, yield 67 mg (81%),  $R_f$  0.38 (1:4, EtOAc/hexanes).  $^1\text{H}$  NMR (500 MHz,  $\text{cdcl}_3$ )  $\delta$  7.96 (d,  $J$  = 8.5 Hz, 2H), 7.41 (d,  $J$  = 8.5 Hz, 2H), 2.48 (s, 3H);  $^{19}\text{F}$  NMR (470 MHz,  $\text{cdcl}_3$ )  $\delta$  -128.36 – -128.95 (m, 2F), -132.79 – -133.35 (m, 2F);  $^{13}\text{C}$  NMR (126 MHz,  $\text{cdcl}_3$ )  $\delta$  148.7 – 148.5 (m), 146.5 – 146.4 (m), 145.1 – 145.0 (m), 143.0 – 142.8 (m), 136.9, 130.6, 128.4, 106.3, and 22.0. I.R:  $\nu$  ( $\text{cm}^{-1}$ ) = 3098 (w), 3067 (w), 2925 (w), 2857 (w), 2248 (m), 1594 (m), 1490 (s). I.R:  $\nu$  ( $\text{cm}^{-1}$ ) = 3098 (w), 3067 (w), 2925 (w), 2857 (w), 2248 (m), 1594 (m), 1490 (s). HRMS (CI),  $[\text{C}_{14}\text{H}_7\text{F}_4\text{NO}_2\text{S} + \text{H}]^+$  calcd. 330.0206, found ( $m/z$ ) 330.0215.

### **1,2,4,5-tetrafluoro-3-(phenylsulfonyl)-6-(trifluoromethyl)benzene<sup>[11]</sup> (4)**

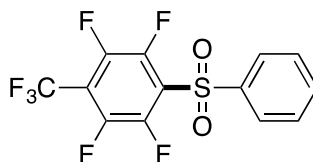

White solid, mp = 135–136 °C, yield 80 mg (89%),  $R_f$  0.40 (1:4, EtOAc/hexanes).  $^1\text{H}$  NMR (500 MHz,  $\text{cdcl}_3$ )  $\delta$  8.11 (d,  $J$  = 8.0 Hz, 2H), 7.75 (t,  $J$  = 7.5 Hz, 1H), 7.63 (t,  $J$  = 8.0 Hz, 2H);  $^{19}\text{F}$  NMR (470 MHz,  $\text{cdcl}_3$ )  $\delta$  -56.87 (t,  $J$  = 21.9 Hz), -133.88 (dd,  $J$  = 20.3, 11.4 Hz), -136.52 (td,  $J$  = 22.1, 13.4 Hz);  $^{13}\text{C}$  NMR (176 MHz,  $\text{cdcl}_3$ ) 145.4 – 145.0 (m), 143.9 – 143.5 (m), 140.0, 135.5, 129.9, 128.3, 125.3 (t,  $J_{\text{C,F}}$  = 14.1 Hz), 120.2 (q,  $J_{\text{C,F}}$  = 276 Hz), 114.3 (qt,  $J_{\text{C,F}}$  = 35.6, 12.7 Hz). I.R:  $\nu$  ( $\text{cm}^{-1}$ ) = 3103 (w), 3086 (w), 1650 (m), 1585 (m).

**2-((2,3,5,6-tetrafluoro-4-(trifluoromethyl)phenyl)sulfonyl)thiophene (5)**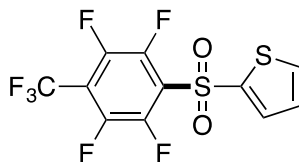

White solid, mp = 134–135 °C, yield 66 mg (73%),  $R_f$  0.23 (1:4, EtOAc/hexanes).  $^1\text{H}$  NMR (500 MHz,  $\text{CDCl}_3$ )  $\delta$  7.95 (d,  $J$  = 4.0 Hz, 1H), 7.86 (dd,  $J$  = 4.0 and 1.0 Hz, 1H), 7.22 (t,  $J$  = 4.0 Hz, 1H);  $^{19}\text{F}$  NMR (470 MHz,  $\text{cdcl}_3$ )  $\delta$  -56.9 (t,  $J_{(\text{C},\text{F})}$  = 21.1 Hz, 3F), -133.8 – -133.9 (m, 2F), -136.4 – -136.7 (m, 2F);  $^{13}\text{C}$  NMR (126 MHz,  $\text{CDCl}_3$ )  $\delta$  145.7 (d,  $J_{(\text{C},\text{F})}$  = 16.5 Hz), 145.2 (d,  $J_{(\text{C},\text{F})}$  = 16.5 Hz), 143.4 (d,  $J_{(\text{C},\text{F})}$  = 17.1 Hz), 143.2 (d,  $J_{(\text{C},\text{F})}$  = 17.1 Hz), 140.7, 136.9, 136.2, 128.7, 125.7 (d,  $J_{(\text{C},\text{F})}$  = 13.1 Hz), 120.2 (q,  $J_{(\text{C},\text{F})}$  = 272 Hz), 114.4–114.2 ppm. I.R:  $\nu$  ( $\text{cm}^{-1}$ ) = 3101 (m), 2963 (w), 2923 (m), 2858 (w). HRMS (CI),  $[\text{C}_{11}\text{H}_3\text{F}_7\text{O}_2\text{S}_2 + \text{H}]^+$  calcd. 364.9535, found ( $m/z$ ) 364.9531.

**4-((2,4-dimethoxyphenyl)sulfonyl)-2,3,5,6-tetrafluorobenzonitrile (6)**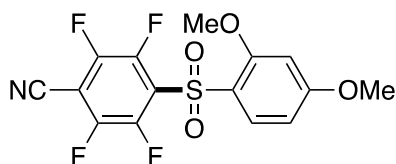

White solid, mp = 145–146 °C, yield 62 mg (66%),  $R_f$  0.14 (1:4, EtOAc/hexanes).  $^1\text{H}$  NMR (500 MHz,  $\text{cdcl}_3$ )  $\delta$  7.99 (d,  $J$  = 8.5 Hz, 1H), 6.63 (dd,  $J$  = 8.5 and 2.0 Hz, 1H), 6.44 (d,  $J$  = 2.0 Hz, 1H);  $^{19}\text{F}$  NMR (470 MHz,  $\text{cdcl}_3$ )  $\delta$  -130.0 (dt,  $J_{(\text{C},\text{F})}$  = 13.2 and 3.3 Hz, 2F), -134.0 (dt,  $J_{(\text{C},\text{F})}$  = 13.2 and 3.3 Hz, 2F);  $^{13}\text{C}$  NMR (126 MHz,  $\text{cdcl}_3$ )  $\delta$  167.2, 159.7, 148.3 (d,  $J$  = 16.0 Hz), 146.1 (d,  $J$  = 15.8 Hz), 145.7 (d,  $J$  = 12.2 Hz), 143.5 (d,  $J$  = 12.0 Hz), 132.4 (d,  $J$  = 5.5 Hz), 127.5 (t,  $J$  = 13.5 Hz), 119.9, 106.6, 105.6, 99.6 (d,  $J$  = 13.1 Hz), 98.0 (t,  $J$  = 17.2 Hz), 56.7, 55.9. I.R:  $\nu$  ( $\text{cm}^{-1}$ ) = 3111 (w), 3091 (w), 3025 (m), 2982 (w), 2949 (m), 2922 (m), 2869 (w), 2847 (m), 2248 (m). HRMS (CI),  $[\text{C}_{15}\text{H}_9\text{F}_4\text{NO}_4\text{S} + \text{H}]^+$  calcd. 376.0261, found ( $m/z$ ) 376.0250.



**4-((3-chloro-2,5,6-trifluoropyridin-4-yl)sulfonyl)benzonitrile (7)**

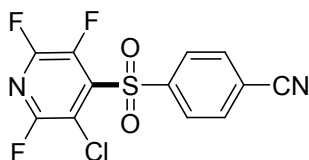

White solid, mp = 192-193 °C, yield 64 mg (77%),  $R_f$  0.51 (1:4, EtOAc/hexanes).  $^1\text{H}$  NMR (700 MHz,  $\text{cdcl}_3$ )  $\delta$  8.22 (d,  $J$  = 8.2 Hz, 2H), 7.93 (d,  $J$  = 8.2 Hz, 2H);  $^{19}\text{F}$  NMR (470 MHz,  $\text{cdcl}_3$ )  $\delta$  -67.78 (dd,  $J$  = 29.6 and 11.3 Hz, 1F), -82.88 (dd,  $J$  = 23.0 and 11.3 Hz, 1F), -134.59 (dd,  $J$  = 29.6 and 23.0 Hz, 1F);  $^{13}\text{C}$  NMR (176 MHz,  $\text{CdCl}_2$ )  $\delta$  152.8 – 151.3 (m), 149.3 – 147.6 (m), 142.9, 141.7 – 140 (m), 140.1 (d,  $J_{\text{C,F}}$  = 10.4 Hz), 133.5, 129.3, 119.4, 116.7, and 113.1 – 112.8 (m) ppm. I.R:  $\nu$  ( $\text{cm}^{-1}$ ) = 3098 (w), 3045 (w), 2959 (w), 2922 (m), 2852 (m), 2237 (m), 1611 (s), 1596 (s). HRMS (CI),  $[\text{C}_{12}\text{H}_4\text{ClF}_3\text{N}_2\text{O}_2\text{S} + \text{H}]^+$  calcd. 332.9707, found ( $m/z$ ) 332.9714.

**3-((3-chloro-2,5,6-trifluoropyridin-4-yl)sulfonyl)benzonitrile (8)**

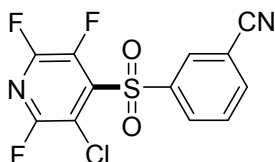

White solid, mp = 118-119 °C, yield 44 mg (53%),  $R_f$  0.28 (1:4, EtOAc/hexanes).  $^1\text{H}$  NMR (700 MHz,  $\text{cdcl}_3$ )  $\delta$  8.42 – 8.23 (m, 2H), 8.03 (d,  $J$  = 7.7 Hz, 1H), 7.81 (t,  $J$  = 7.7 Hz, 1H);  $^{19}\text{F}$  NMR (470 MHz,  $\text{cdcl}_3$ )  $\delta$  -67.76 (dd,  $J$  = 29.9, 11.9 Hz, 1F), -82.83 (dd,  $J$  = 23.0, 11.6 Hz, 1F), -134.63 (dd,  $J$  = 29.9, 23.0 Hz, 1F);  $^{13}\text{C}$  NMR (176 MHz,  $\text{CdCl}_2$ )  $\delta$  152.8 – 151.3 (m), 149.3 – 147.6 (m), 141.7 – 140.0 (m), 140.7, 140.1 – 139.9 (m), 138.5, 132.5, 132.2, 131.0, 116.5, 114.8, and 113.1 – 112.8 ppm. I.R:  $\nu$  ( $\text{cm}^{-1}$ ) = 3057 (w), 2944 (m), 2832 (m), 2238 (w), 1609 (w). HRMS (CI),  $[\text{C}_{12}\text{H}_4\text{ClF}_3\text{N}_2\text{O}_2\text{S}]^+$  calcd. 331.9629, found ( $m/z$ ) 331.9629.

**3-chloro-2,5,6-trifluoro-4-tosylpyridine (9)**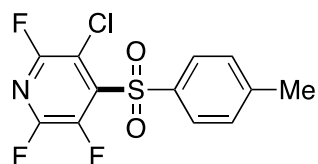

White solid, mp = 181 - 182 °C, yield 68 mg (84%),  $R_f$  0.30 (1.5:8.5, EtOAc/hexanes).  $^1\text{H}$  NMR (500 MHz,  $\text{cdcl}_3$ )  $\delta$  7.98 (d,  $J$  = 8.2 Hz, 2H), 7.41 (d,  $J$  = 8.2 Hz, 2H), 2.48 (s, 3H);  $^{19}\text{F}$  NMR (470 MHz,  $\text{cdcl}_3$ )  $\delta$  -68.98 (dd,  $J$  = 29.6, 12.0 Hz), -84.22 (dd,  $J$  = 22.6, 12.0 Hz), -135.21 (dd,  $J$  = 29.6, 23.1 Hz);  $^{13}\text{C}$  NMR (176 MHz,  $\text{cdcl}_3$ )  $\delta$  152.6 – 151.2 (m), 149.1 – 147.5 (m), 147.3, 114.8 (d,  $J_{\text{C,F}}$  = 10.2 Hz), 141.6 – 139.8 (m), 136.2, 130.5, 128.7, 112.8 – 112.6 (m), and 22.0 ppm. I.R:  $\nu(\text{cm}^{-1})$  = 3093 (w), 3071 (w), 2961 (m), 2925 (m), 2851 (m). HRMS (CI),  $[\text{C}_{12}\text{H}_7\text{ClF}_3\text{NO}_2\text{S} + \text{H}]^+$  calcd. 321.9911, found ( $m/z$ ) 321.9904.

**2,3,5,6-tetrafluoro-4-((1,2,5-trimethyl-1*H*-imidazol-4-yl)sulfonyl)pyridine (10)**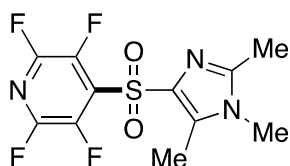

White solid, mp = 157-158 °C, yield 66 mg (82%),  $R_f$  0.11 (2:3, EtOAc/hexanes).  $^1\text{H}$  NMR (500 MHz,  $\text{cdcl}_3$ )  $\delta$  3.75 (s, 1H), 2.53 (s, 1H), 2.36 (s, 1H);  $^{19}\text{F}$  NMR (470 MHz,  $\text{cdcl}_3$ )  $\delta$  -86.4 – -86.5 (m, 2F), -138.4 – -138.6 (m, 2F);  $^{13}\text{C}$  NMR (126 MHz,  $\text{cdcl}_3$ )  $\delta$  149.5, 145.2 (d,  $J_{\text{C,F}}$  = 17.3 Hz), 145.0, 143.1 (dt,  $J_{\text{C,F}}$  = 17.3 and 7.7 Hz), 139.8 (dd,  $J_{\text{C,F}}$  = 27.8 and 7.7 Hz), 137.7 (dd,  $J_{\text{C,F}}$  = 36.5 and 7.7 Hz), 134.4 (dd,  $J_{\text{C,F}}$  = 17.3 and 7.7 Hz), 115.1, 36.7, 12.9, 10.7 ppm. IR:  $\nu(\text{cm}^{-1})$  = 2948 (w), 1643 (m), 1526 (w). HRMS (CI),  $[\text{C}_{11}\text{H}_9\text{F}_4\text{N}_3\text{O}_2\text{S} + \text{H}]^+$  calcd. 324.0424, found ( $m/z$ ) 324.0412.

**2,3,5,6-tetrafluoro-4-((4-fluorophenyl)sulfonyl)pyridine (11)**

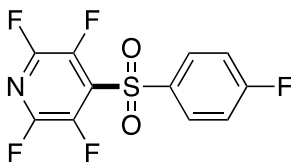

White solid, mp = 171 - 172 °C, yield 69 mg (89%),  $R_f$  0.35 (1:9, EtOAc/hexanes).  $^1\text{H}$  NMR (500 MHz,  $\text{cdCl}_3$ )  $\delta$  8.15 (dd,  $J$  = 8.5 and 5.5 Hz, 2H), 7.31 (dd,  $J$  = 8.5 and 5.5 Hz, 2H);  $^{19}\text{F}$  NMR (470 MHz,  $\text{cdCl}_3$ )  $\delta$  -85.40 – -85.56 (m, 2F), -99.00 – -99.06 (m, 1F), -137.02 – -137.19 (m, 2F);  $^{13}\text{C}$  NMR (126 MHz,  $\text{cdCl}_3$ )  $\delta$  167.2 (d,  $J_{\text{C,F}}$  = 260 Hz), 145.4 – 143.3 (m), 140.0 – 137.5 (m), 135.3, 131.1 – 131.8 (m), 131.9 (d,  $J_{\text{C,F}}$  = 9.6 Hz), 117.6 (d,  $J_{\text{C,F}}$  = 22.2 Hz). I.R:  $\nu$  ( $\text{cm}^{-1}$ ) = 3115 (w), 1633 (w), 1590 (m). HRMS (CI),  $[\text{C}_{11}\text{H}_4\text{F}_5\text{NO}_2\text{S} + \text{H}]^+$  calcd. 309.9961, found ( $m/z$ ) 309.9982.

**1,2,4,5-tetrafluoro-3-((4-fluorophenyl)sulfonyl)-6-(trifluoromethyl)benzene (12)**

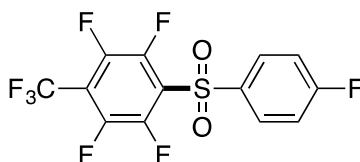

White solid, mp = 132-133 °C, yield 61 mg (65%),  $R_f$  0.56 (1:4, EtOAc/hexanes).  $^1\text{H}$  NMR (500 MHz,  $\text{cdCl}_3$ )  $\delta$  8.13 (dd,  $J$  = 8.5 and 5.0 Hz, 2H), 7.30 (dd,  $J$  = 8.5 and 0.5 Hz, 2H);  $^{19}\text{F}$  NMR (470 MHz,  $\text{cdCl}_3$ )  $\delta$  -56.8 – -57.0 (m, 3F), -133.9 – -134.0 (m, 2F), -136.3 – -136.4 (m, 2F);  $^{13}\text{C}$  NMR (176 MHz,  $\text{cdCl}_3$ )  $\delta$  167.7, 166.2, 145.4 -14.4 (m), 136.1, 131.5 (d,  $J_{\text{C,F}}$  = 9.9 Hz), 125.2 (t,  $J_{\text{C,F}}$  = 14.1 Hz), 120.(q,  $J_{\text{C,F}}$  = 275 Hz), 117.4 (d,  $J_{\text{C,F}}$  = 23 Hz), 114.8 – 114.3 (m). IR:  $\nu$  ( $\text{cm}^{-1}$ ) = 3114 (w), 2958 (w), 2922 (m), 2854 (m). HRMS (CI),  $[\text{C}_{13}\text{H}_4\text{F}_8\text{O}_2\text{S} + \text{H}]^+$  calcd. 376.9883, found ( $m/z$ ) 376.9877.

**2,3,5,6-tetrafluoro-4-tosylpyridine (13)**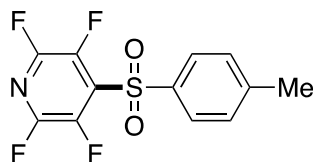

White solid, mp = 183 - 184 °C, yield 70 mg (92%),  $R_f$  0.38 (1:9, EtOAc/hexanes).  $^1\text{H}$  NMR (500 MHz,  $\text{cdcl}_3$ )  $\delta$  7.99 (d,  $J$  = 8.5 Hz, 2H), 7.43 (d,  $J$  = 8.5 Hz, 2H), 2.48 (s, 3H);  $^{19}\text{F}$  NMR (470 MHz,  $\text{cdcl}_3$ )  $\delta$  -85.9 4– -86.03 (m, 2F), -137.10 – -137.25 (m, 2F).  $^{13}\text{C}$  NMR (101 MHz,  $\text{cdcl}_3$ )  $\delta$  147.5, 145.7 – 144.4 (m), 140.3 – 137.2 (m), 136.4, 133.6 (t,  $J_{\text{C,F}}$  = 17.4 Hz), 130.7, 128.7, and 22.0 ppm. HRMS (CI),  $[\text{C}_{12}\text{H}_7\text{F}_4\text{NO}_2\text{S} + \text{H}]^+$  calcd. 306.0212, found ( $m/z$ ) 306.0209.

**2,3,5,6-tetrafluoro-4-((3-nitrophenyl)sulfonyl)pyridine (14)**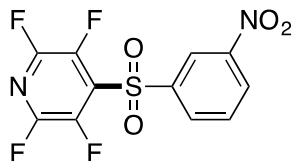

White solid, mp = 127-128 °C, yield 48 mg (57%),  $R_f$  0.19 (1:4, EtOAc/hexanes).  $^1\text{H}$  NMR (500 MHz,  $\text{cdcl}_3$ )  $\delta$  8.92 (s, 1H), 8.62 (d,  $J$  = 8.2 Hz, 1H), 8.45 (d,  $J$  = 7.8 Hz, 1H), 7.91 (t,  $J$  = 8.0 Hz, 1H);  $^{19}\text{F}$  NMR (470 MHz,  $\text{cdcl}_3$ )  $\delta$  -84.4 – -84.6 (m, 2F), -136.3 – -136.5 (m, 2F);  $^{13}\text{C}$  NMR (126 MHz,  $\text{cdcl}_3$ )  $\delta$  148.8, 145.4 (d,  $J_{\text{C,F}}$  = 13.9 Hz), 143.4 (d,  $J_{\text{C,F}}$  = 13.9 Hz), 141.3, 139.7 (d,  $J_{\text{C,F}}$  = 36.5 Hz), 137.7 (d,  $J_{\text{C,F}}$  = 36.5 Hz), 134.1, 131.6, 130.2, and 124.1 ppm. IR:  $\nu(\text{cm}^{-1})$  = 3096 (m), 3052 (w), 2956 (w), 2926 (m), 2875 (w), 2855 (m), 1542 (s), 1352 (s). HRMS (CI),  $[\text{C}_{11}\text{H}_4\text{F}_4\text{N}_2\text{O}_4\text{S} + \text{H}]^+$  calcd. 336.9901, found ( $m/z$ ) 336.9891.

**4-((4-acetyl-2,3,5,6-tetrafluorophenyl)sulfonyl)benzonitrile (15)**

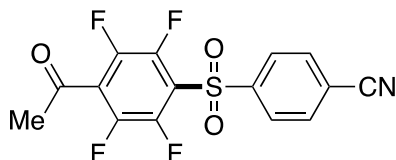

White solid, mp = 184-185 °C, yield 45 mg (50%),  $R_f$  0.44 (1:4, EtOAc/hexanes).  $^1\text{H}$  NMR (500 MHz,  $\text{CDCl}_3$ )  $\delta$  8.21 (d,  $J$  = 8.5 Hz, 2H), 7.91 (d,  $J$  = 8.5 Hz, 2H), 2.61 (s, 3H);  $^{19}\text{F}$  NMR (470 MHz,  $\text{cdcl}_3$ )  $\delta$  -130.8 (d,  $J_{(\text{C},\text{F})}$  = 9.4 Hz, 2F), -134.8 (d,  $J_{(\text{C},\text{F})}$  = 9.4 Hz, 2F);  $^{13}\text{C}$  NMR (126 MHz,  $\text{CDCl}_3$ )  $\delta$  190.5, 145.3 (d,  $J_{(\text{C},\text{F})}$  = 16.2 Hz), 144.2, 143.2 (d,  $J_{(\text{C},\text{F})}$  = 16.2 Hz), 133.5, 129.0, 125.0, 122.1, 118.9, 116.8, and 32.4 ppm. I.R:  $\nu$  ( $\text{cm}^{-1}$ ) = 3105 (m), 3048 (w), 2958 (w), 2926 (m), 2855 (w), 2236 (m), 1938 (w), 1714 (s). HRMS (CI),  $[\text{C}_{15}\text{H}_7\text{F}_4\text{NO}_3\text{S} + \text{H}]^+$  calcd. 358.0156, found ( $m/z$ ) 358.0142.

**1-(2,3,5,6-tetrafluoro-4-(naphthalen-2-ylsulfonyl)phenyl)ethan-1-one (16)**

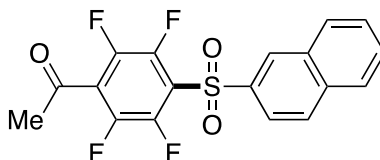

White solid, mp = 145-146 °C, yield 71 mg (74%),  $R_f$  0.42 (1:4, EtOAc/hexanes).  $^1\text{H}$  NMR (500 MHz,  $\text{cdcl}_3$ )  $\delta$  8.69 (s, 1H), 8.05 (d,  $J$  = 8.5 Hz, 1H), 8.02 – 8.00 (m, 2H), 7.94 (d,  $J$  = 8.0 Hz, 1H), 7.72 (dd,  $J$  = 8.0 and 0.5 Hz, 1H), 7.67 (dd,  $J$  = 8.0 and 0.5 Hz, 1H);  $^{19}\text{F}$  NMR (470 MHz,  $\text{cdcl}_3$ )  $\delta$  -134.4 – -134.6 (m, 2F), -138.8 – -138.9 (m, 2F);  $^{13}\text{C}$  NMR (126 MHz,  $\text{cdcl}_3$ )  $\delta$  190.8, 145.2 (d,  $J_{(\text{C},\text{F})}$  = 15.4 Hz), 144.9 (d,  $J_{(\text{C},\text{F})}$  = 15.4 Hz), 143.1 (d,  $J_{(\text{C},\text{F})}$  = 18.3 Hz), 142.8 (d,  $J_{(\text{C},\text{F})}$  = 15.4 Hz), 137.2, 136.0, 132.2, 130.5, 130.3, 130.2, 129.9, 128.8, 124.0, 123.5, 122.2, and 32.3 ppm. I.R:  $\nu$  ( $\text{cm}^{-1}$ ) = 3077 (w), 3056 (w), 2962 (w), 2929 (m), 2851 (w), 1714 (s), 1626 (m), 1589 (m). HRMS (CI),  $[\text{C}_{18}\text{H}_{10}\text{F}_4\text{O}_3\text{S} + \text{H}]^+$  calcd. 383.0360, found ( $m/z$ ) 383.0367.

**2,3,5,6-tetrafluoro-4-((6-(trifluoromethyl)pyridin-3-yl)sulfonyl)benzonitrile (17)**

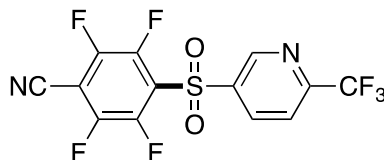

White solid, mp = 127-128 °C, yield 69 mg (72%),  $R_f$  0.55 (1:4, EtOAc/hexanes).  $^1\text{H}$  NMR (500 MHz,  $\text{CDCl}_3$ )  $\delta$  9.37 (s, 1H), 8.58 (d,  $J$  = 8.0 Hz, 1H), 7.97 (d,  $J$  = 8.0 Hz, 1H);  $^{19}\text{F}$  NMR (470 MHz,  $\text{cdcl}_3$ )  $\delta$  -68.4 (s, 3F), -127.2 – -127.3 (m, 2F), -132.4 – -132.5 (m, 2F);  $^{13}\text{C}$  NMR (126 MHz,  $\text{CDCl}_3$ )  $\delta$  153.8 (q,  $J_{(\text{C},\text{F})}$  = 36.3 Hz), 149.7, 148.8 (dd,  $J_{(\text{C},\text{F})}$  = 16.4 and 6.0 Hz), 146.7 (dd,  $J_{(\text{C},\text{F})}$  = 17.9 and 4.2 Hz), 145.3 (dd,  $J_{(\text{C},\text{F})}$  = 17.9 and 4.2 Hz), 143.2 – 143.1 (m), 139.0, 138.3, 125.5 – 125.3 (m), 121.6, 121.5, 119.4, and 100.2 ppm. I.R:  $\nu$  ( $\text{cm}^{-1}$ ) = 3104 (w), 3058 (w), 3028 (w), 2922 (m), 2844 (w), 2251 (m), 1584 (m), 1572 (m). HRMS (CI),  $[\text{C}_{13}\text{H}_3\text{F}_7\text{N}_2\text{O}_2\text{S} + \text{H}]^+$  calcd. 384.9876, found ( $m/z$ ) 384.9883.

**2,3,5,6-tetrafluoro-4-(naphthalen-2-ylsulfonyl)benzonitrile (18)**

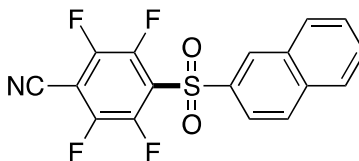

White solid, mp = 184 - 185 °C, yield 86 mg (94%),  $R_f$  0.48 (1:4, EtOAc/hexanes).  $^1\text{H}$  NMR (500 MHz,  $\text{cdcl}_3$ )  $\delta$  8.70 (s, 1H), 8.06 (d,  $J$  = 8.0 Hz, 1H), 8.05 (d,  $J$  = 8.0 Hz, 1H), 7.99 (d,  $J$  = 8.0 Hz, 1H), 7.96 (d,  $J$  = 8.0 Hz, 1H), 7.76 – 7.73 (m, 1H), 7.73 – 7.69 (m, 1H);  $^{19}\text{F}$  NMR (470 MHz,  $\text{cdcl}_3$ )  $\delta$  -128.5 (dd,  $J$  = 21.6 and 13.2 Hz, 2F), -132.8 (dd,  $J$  = 21.6 and 13.2 Hz, 2F);  $^{13}\text{C}$  NMR (126 MHz,  $\text{cdcl}_3$ )  $\delta$  148.6 (d,  $J_{(\text{C},\text{F})}$  = 16.2 Hz), 146.5 (d,  $J_{(\text{C},\text{F})}$  = 16.2 Hz), 145.2 (d,  $J_{(\text{C},\text{F})}$  = 8.9 Hz), 143.1 (d,  $J_{(\text{C},\text{F})}$  = 8.9 Hz), 136.5, 136.2, 132.2, 131.0, 130.6, 130.5, 130.0, 128.5, 128.3, 122.1, and

106.3 ppm. I.R:  $\nu$  ( $\text{cm}^{-1}$ ) = 3171 (w), 2924 (w), 2239 (m), 1619 (m). HRMS (CI),  $[\text{C}_{17}\text{H}_7\text{F}_4\text{NO}_2\text{S}]^+$  calcd. 366.0206, found ( $m/z$ ) 366.0191.

**1,2,4,5-tetrafluoro-3-tosyl-6-(trifluoromethyl)benzene (19)**

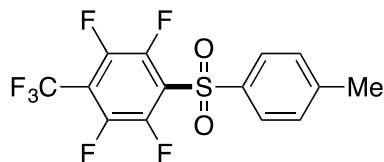

White solid, mp = 159-160 °C, yield 76 mg (82%),  $R_f$  0.44 (1:4, EtOAc/hexanes).  $^1\text{H}$  NMR (400 MHz,  $\text{CDCl}_3$ )  $\delta$  7.97 (d,  $J$  = 8.4 Hz, 2H), 7.41 (d,  $J$  = 8.4 Hz, 2H), 2.45 (s, 3H);  $^{19}\text{F}$  NMR (376 MHz,  $\text{CDCl}_3$ )  $\delta$  -56.88 (t,  $J$  = 23.3 Hz, 3F), -134.05 – -134.14 (m, 2F), -136.69 – -136.81 (m, 2F);  $^{13}\text{C}$  NMR (101 MHz,  $\text{CDCl}_3$ )  $\delta$  147.0, 145.6-145.5 (m), 143.3-142.8 (m), 137.1, 130.5, 128.4, 125.7 (t,  $J_{(\text{C},\text{F})}$  = 14.3 Hz), 120.2 (q,  $J_{(\text{C},\text{F})}$  = 277 Hz), 116.0 – 113.4 (m), and 21.9 ppm. HRMS (CI),  $[\text{C}_{14}\text{H}_7\text{F}_7\text{O}_2\text{S}]^+$  calcd. 373.0128, found ( $m/z$ ) 373.0114.

**4-((4-cyanophenyl)sulfonyl)-2,3,5,6-tetrafluorobenzonitrile (20)**

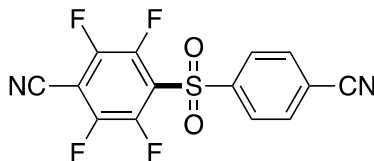

Yellow solid, mp = 229-230 °C, yield 61 mg (72%),  $R_f$  0.47 (1:4, EtOAc/hexanes).  $^1\text{H}$  NMR (500 MHz, dmsO)  $\delta$  8.25 (d,  $J$  = 8.6 Hz, 2H), 8.21 (d,  $J$  = 8.6 Hz, 2H);  $^{19}\text{F}$  NMR (470 MHz,  $\text{cdcl}_3$ )  $\delta$  -128.65 – -129.06 (m), -133.52 (td,  $J$  = 13.8, 5.0 Hz);  $^{13}\text{C}$  NMR (126 MHz, dmsO)  $\delta$  148.4 (d,  $J_{(\text{C},\text{F})}$  = 16.9 Hz), 146.3 (d,  $J_{(\text{C},\text{F})}$  = 20.0 Hz), 144.7 (d,  $J_{(\text{C},\text{F})}$  = 14.7 Hz), 142.8, 142.6 (d,  $J_{(\text{C},\text{F})}$  = 16.4 Hz), 134.2, 128.6, 117.9, 117.2, and 107.2 ppm. I.R:  $\nu$  ( $\text{cm}^{-1}$ ) = 3098 (w), 3044 (w), 2960 (w), 2923 (m), 2853 (m), 2237 (m), 1610 (s), 1595 (s). HRMS (CI),  $[\text{C}_{14}\text{H}_4\text{F}_4\text{N}_2\text{O}_2\text{S} + \text{H}]^+$  calcd. 341.0002, found ( $m/z$ ) 341.0011.

**2,3,5,6-tetrafluoro-4-((tetrahydrofuran-3-yl)sulfonyl)benzonitrile (21)**

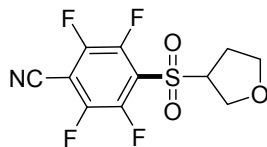

White solid, mp = 133 - 134 °C, yield 60 mg (77%), *R*<sub>f</sub> 0.38 (1:4, EtOAc/hexanes). <sup>1</sup>H NMR (700 MHz, cdcl<sub>3</sub>) δ 4.39 – 4.28 (m, 1H), 4.03 (ddd, *J* = 23.3, 13.2, 5.6 Hz, 3H), 3.85 (dd, *J* = 14.7, 7.5 Hz, 1H), 2.53 – 2.26 (m, 2H); <sup>19</sup>F NMR (470 MHz, cdcl<sub>3</sub>) δ -127.63 (dq, *J* = 12.2, 7.0 Hz, 2F), -131.93 (dq, *J* = 12.2, 7.0 Hz, 2F); <sup>13</sup>C NMR (176 MHz, cdcl<sub>3</sub>) δ 148.5 – 146.8 (m), 145.6 – 144.0 (m), 124.0 (t, *J*<sub>(C,F)</sub> = 16 Hz), 106.1, 99.8 (t, *J*<sub>(C,F)</sub> = 16 Hz), 68.4, 66.9, 66.2, and 27.3 ppm. I.R.: ν (cm<sup>-1</sup>) = 2986 (w), 2886 (w), 2247 (w), 1468 (s). HRMS (CI), [C<sub>11</sub>H<sub>7</sub>F<sub>4</sub>NO<sub>3</sub>S + Na]<sup>+</sup> calcd. 331.9975, found (*m/z*) 331.9974.

**3-chloro-2,5,6-trifluoro-4-((tetrahydrofuran-3-yl)sulfonyl)pyridine (22)**

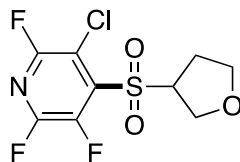

Yellow solid, mp = 128-129 °C, yield 54 mg (71%), *R*<sub>f</sub> 0.14 (1:4, EtOAc/hexanes). <sup>1</sup>H NMR (500 MHz, cdcl<sub>3</sub>) δ 4.33 (dd, *J* = 10.3, 4.7 Hz, 1H), 4.24 – 4.13 (m, 1H), 4.12 – 3.97 (m, 2H), 3.89 (dd, *J* = 14.2, 7.7 Hz, 1H), 2.50 (dt, *J* = 12.8, 5.6 Hz, 1H), 2.28 (ddt, *J* = 13.7, 9.4, 7.0 Hz, 1H); <sup>19</sup>F NMR (470 MHz, cdcl<sub>3</sub>) δ -67.8 (dd, *J*<sub>(C,F)</sub> = 29.6 and 11.7 Hz, 1F), -82.9 (dd, *J*<sub>(C,F)</sub> = 23.0 and 11.7 Hz, 1F), -135.0 (dd, *J*<sub>(C,F)</sub> = 30.0 and 23.0 Hz, 1F); <sup>13</sup>C NMR (176 MHz, cdcl<sub>3</sub>) δ 152.9 – 151.4 (m), 149.3 – 147.7 (m), 142.2 – 140.4 (m), 139.0 (d, *J*<sub>(C,F)</sub> = 11 Hz), 113.6 – 113.3 (m), 68.4, 66.8, 64.7, 27.3 ppm. IR: ν(cm<sup>-1</sup>) = 2966 (m), 2902 (m), 2494 (w), 1715 (m), 1612 (s). HRMS (CI), [C<sub>9</sub>H<sub>7</sub>ClF<sub>3</sub>NO<sub>3</sub>S + H]<sup>+</sup> calcd. 301.9860, found (*m/z*) 301.9861.



**tert-butyl 3-((2,3,5,6-tetrafluoro-4-(trifluoromethyl)phenyl)sulfonyl)azetidine-1-carboxylate (23)**

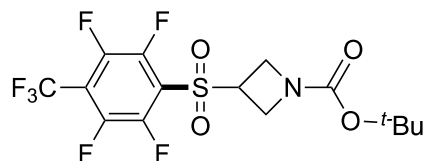

White solid, mp = 152 - 153 °C, yield 85 mg (78%),  $R_f$  0.53 (2:3, EtOAc/hexanes).  $^1\text{H}$  NMR (500 MHz,  $\text{cdCl}_3$ )  $\delta$  4.40 – 4.37 (m, 2H), 4.36 – 4.31 (m, 1H), 4.30 – 4.22 (m, 2H), 1.45 (s, 9H);  $^{19}\text{F}$  NMR (470 MHz,  $\text{cdCl}_3$ )  $\delta$  -56.87 (t,  $J$  = 21.2 Hz, 3F), -133.26 – -133.33 (m, 2F), -135.07 – -135.23 (m, 2F);  $^{13}\text{C}$  NMR (126 MHz,  $\text{cdCl}_3$ )  $\delta$  155.6, 145.8 (d,  $J_{\text{C,F}}$  = 14.5 Hz), 143.7 (d,  $J_{\text{C,F}}$  = 15.4 Hz), 121.8 – 121.6 (m), 120.0 (t,  $J_{\text{C,F}}$  = 278 Hz), 115.6 – 115.2 (m), 81.2, 55.4, 49.2, and 28.4 ppm. I.R:  $\nu$  ( $\text{cm}^{-1}$ ) = 2984 (w), 2895 (w), 1708 (m), 1606 (w). HRMS (CI),  $[\text{C}_{15}\text{H}_{14}\text{F}_7\text{NO}_4\text{S} + \text{H} - \text{boc}]^+$  calcd. 337.0007, found ( $m/z$ ) 336.9998. MALDI-TOF ( $\text{C}_{15}\text{H}_{14}\text{F}_7\text{NO}_4\text{S} + \text{Na}$ ) calcd. 460.0429, found 460.0459.

**1-(2,3,5,6-tetrafluoro-4-tosylphenyl)ethan-1-one (24)**

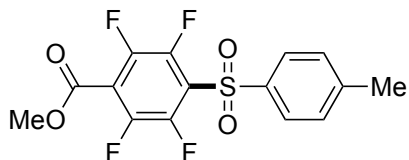

White solid, mp = 141–142 °C, yield 62 mg (69%),  $R_f$  0.40 (1:4, EtOAc/hexanes).  $^1\text{H}$  NMR (500 MHz,  $\text{cdCl}_3$ )  $\delta$  7.97 (d,  $J$  = 8.0 Hz, 2H), 7.39 (d,  $J$  = 8.0 Hz, 2H), 3.98 (s, 3H), 2.46 (s, 3H);  $^{19}\text{F}$  NMR (470 MHz,  $\text{cdCl}_3$ )  $\delta$  -135.13 – -135.05 (m, 2F), -136.29 – -136.39 (m, 2F);  $^{13}\text{C}$  NMR (176 MHz,  $\text{cdCl}_3$ )  $\delta$  159.0, 146.7 – 145.5 (m), 137.6, 130.4 (d,  $J_{\text{C,F}}$  = 40 Hz), 128.4, 126.2, 124.2, 117.1 (t,  $J_{\text{C,F}}$  = 17 Hz), 53.9, and 22.0 ppm. I.R:  $\nu$  ( $\text{cm}^{-1}$ ) = 3091 (w), 3070 (w), 2964 (m), 2920 (m), 2851 (m), 1741 (s), 1598 (m). HRMS (CI),  $[\text{C}_{15}\text{H}_{10}\text{F}_4\text{O}_4\text{S} + \text{Na}]^+$  calcd. 385.0134, found ( $m/z$ ) 385.0141.

**2,3,5,6-tetrafluoro-4-((4-fluorophenyl)sulfonyl)benzaldehyde (25)**

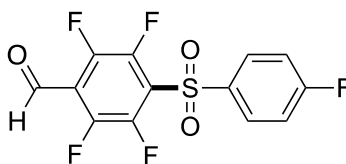

Cream white solid, mp = 111–112 °C, yield 59 mg (70%),  $R_f$  0.28 (3:7, EtOAc/hexanes).  $^1\text{H}$  NMR (400 MHz,  $\text{cdcl}_3$ )  $\delta$  10.28 (s, 1H), 8.13 (dd,  $J$  = 7.6 and 5.6 Hz, 2H), 7.30 (t,  $J$  = 8.8 Hz);  $^{19}\text{F}$  NMR (376 MHz,  $\text{cdcl}_3$ )  $\delta$  -99.83 (d,  $J$  = 5.6 Hz, 1F), -134.98 (m, -134.94 – -135.02, 2F), -141.71 (m, -141.66 – -141.75, 2 F);  $^{13}\text{C}$  NMR (176 MHz,  $\text{cdcl}_3$ )  $\delta$  181.4, 167.6, 166.1, 147.6-143.3 (m), 136.1 (d,  $J_{\text{C,F}}$  = 4.0 Hz), 131.5 (d,  $J_{\text{C,F}}$  = 10.2 Hz), 126.0 (dd,  $J_{\text{C,F}}$  = 15.0, 4.0 Hz), 118.4 (dd,  $J_{\text{C,F}}$  = 1.7, 1.1 Hz), 117.4 (dd,  $J_{\text{C,F}}$  = 23.2, 1.1 Hz). IR:  $\nu$  ( $\text{cm}^{-1}$ ) = 3114 (w), 2957 (w), 2924 (m), 2892 (w), 2875 (w), 2854 (w), 2770 (w), 1910 (w), 1717 (s), 1641 (w), 1589 (s). MALDI-TOF 335.973 (Calcd.  $m/z$  335.983).

**1,2,4,5-tetrafluoro-3-(trifluoromethyl)-6-((2,4,6-triisopropylphenyl)sulfonyl)benzene (26)**

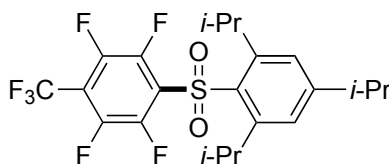

White solid, yield 87 mg (72%),  $R_f$  0.32 (15:85, EtOAc/hexanes).  $^1\text{H}$  NMR (500 MHz,  $\text{cdcl}_3$ )  $\delta$  6.91 (s, 2H), 3.56 – 3.51 (m, 2H), 2.95 – 2.79 (m, 1H), 1.20-1.19 (m, 6H), 1.11 – 0.99 (m, 12H);  $^{19}\text{F}$  NMR (470 MHz,  $\text{cdcl}_3$ )  $\delta$  -56.03 (dd,  $J$  = 21.6 and 6.6 Hz, 3F), -136.32 (d,  $J$  = 9.8 Hz, 2F), -141.08 (d,  $J$  = 9.8 Hz, 2F). MALDI-TOF 484.133 (Calcd.  $m/z$  484.130).

## **12. References**

- [1] N. Du, G. P. Robertson, J. Song, I. Pinnau, S. Thomas, M. D. Guiver, *Macromolecules*, **2008**, *41*, 9656.
- [2] R. Ahlrichs, M. Bar, M. Haser, H. Horn, C. Kolmel, *Chem. Phys. Lett.* **1989**, *162*, 165-169.
- [3] a) A. D. Becke, *Phys. Rev. A* **1988**, *38*, 3098-3100; b) J. P. Perdew, *Phys. Rev. B: Condens. Matter* **1986**, *33*, 8822-8824.
- [4] A. Schafer, H. Horn, R. Ahlrichs, *J. Chem. Phys.* **1992**, *97*, 2571-2577.
- [5] A. Klamt, G. Schüürmann, *J. Chem. Soc., Perkin Trans. 2* **1993**, 799-805.
- [6] A. Klamt, F. Eckert, W. Arlt, in *Annual Review of Chemical and Biomolecular Engineering, Vol 1, Vol. 1*, **2010**, pp. 101-122.
- [7] M. P. Andersson, F. Eckert, J. Reinich, A. Klamt, *Fluid Phase Equilib.* **2017**, <https://doi.org/10.1016/j.fluid.2017.06.005>, *in press*.
- [8] F. Eckert, A. Klamt, C3.0, Release 13.01 ed., COSMOlogic GmbH & Co. KG, Leverkusen, Germany, **2013**.
- [9] M. P. Andersson, M. Bennetzen, A. Klamt, S. L. S. Stipp, *J. Chem. Theory Comput.* **2014**, *10*, 3401-3408.
- [10] A. Silvestri, S. L. S. Stipp, M. P. Andersson, *J. Chem. Theory Comput.* **2017**, *13*, 804-810.
- [11] D. J. Alsop, J. Burdon, J. C. Tatlow, *J. Chem. Soc.* **1962**, 1801.

### **13. $^1\text{H}$ , $^{13}\text{C}$ , and $^{19}\text{F}$ NMR Spectra**

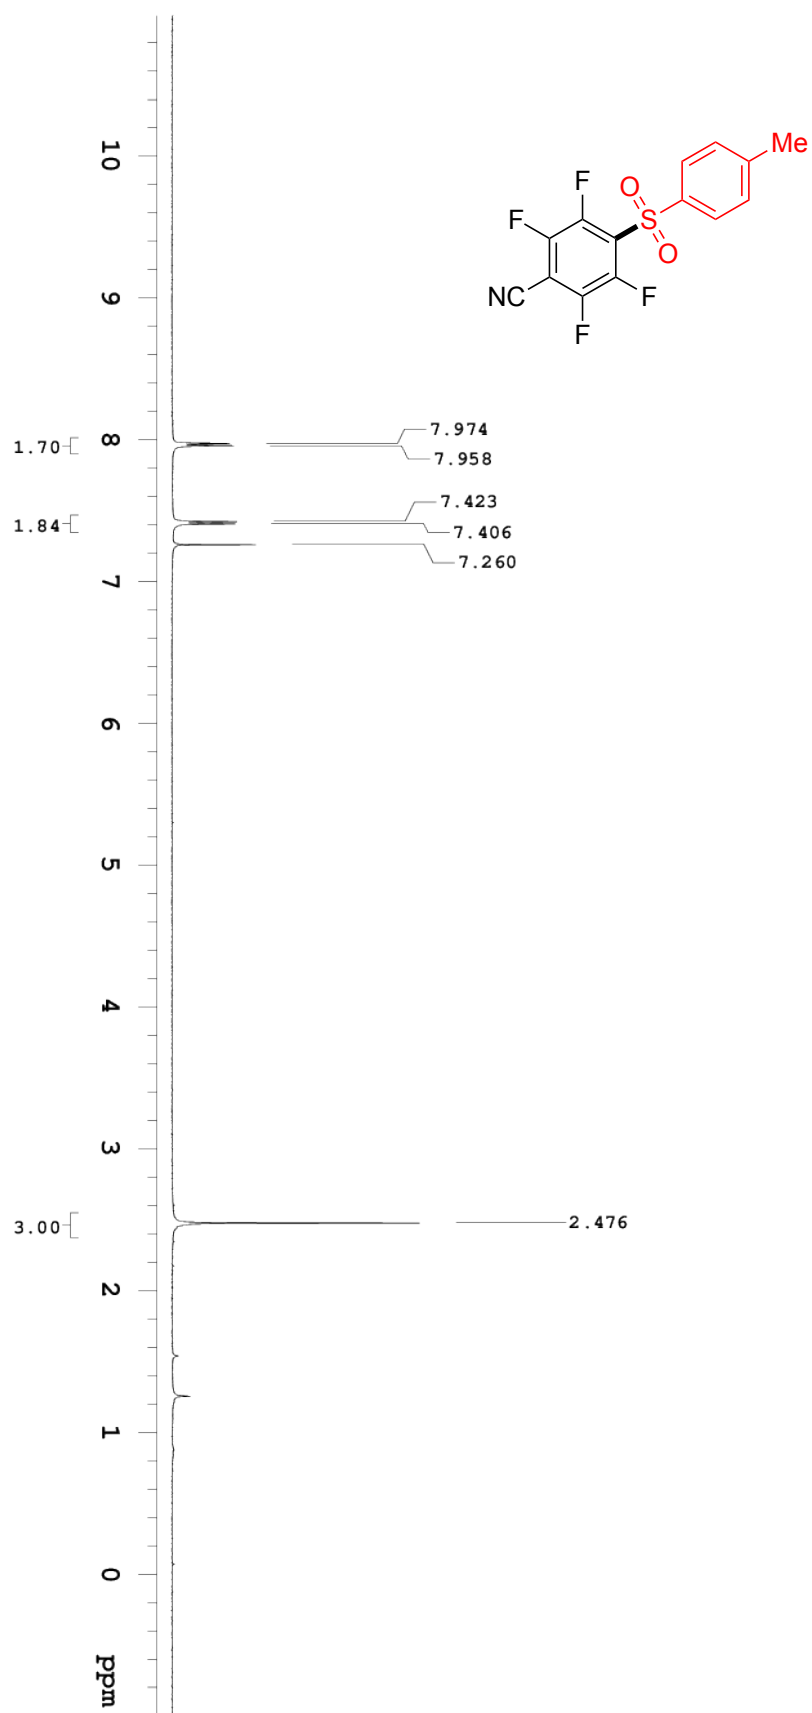

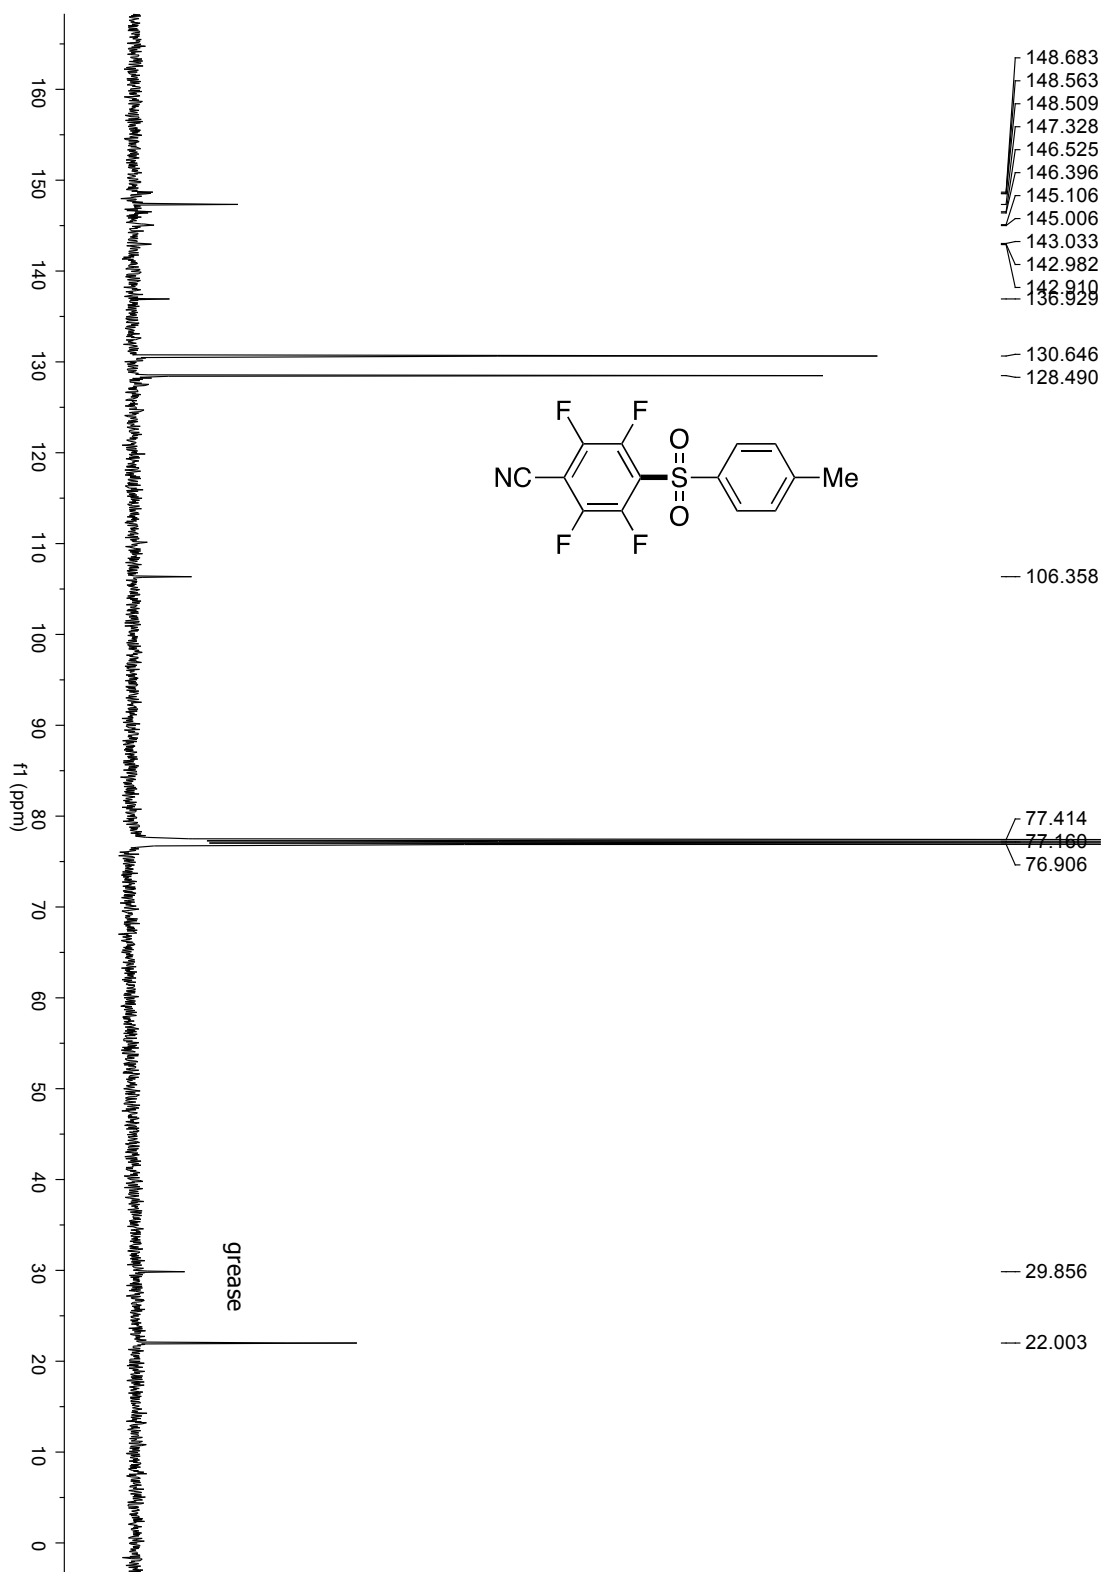

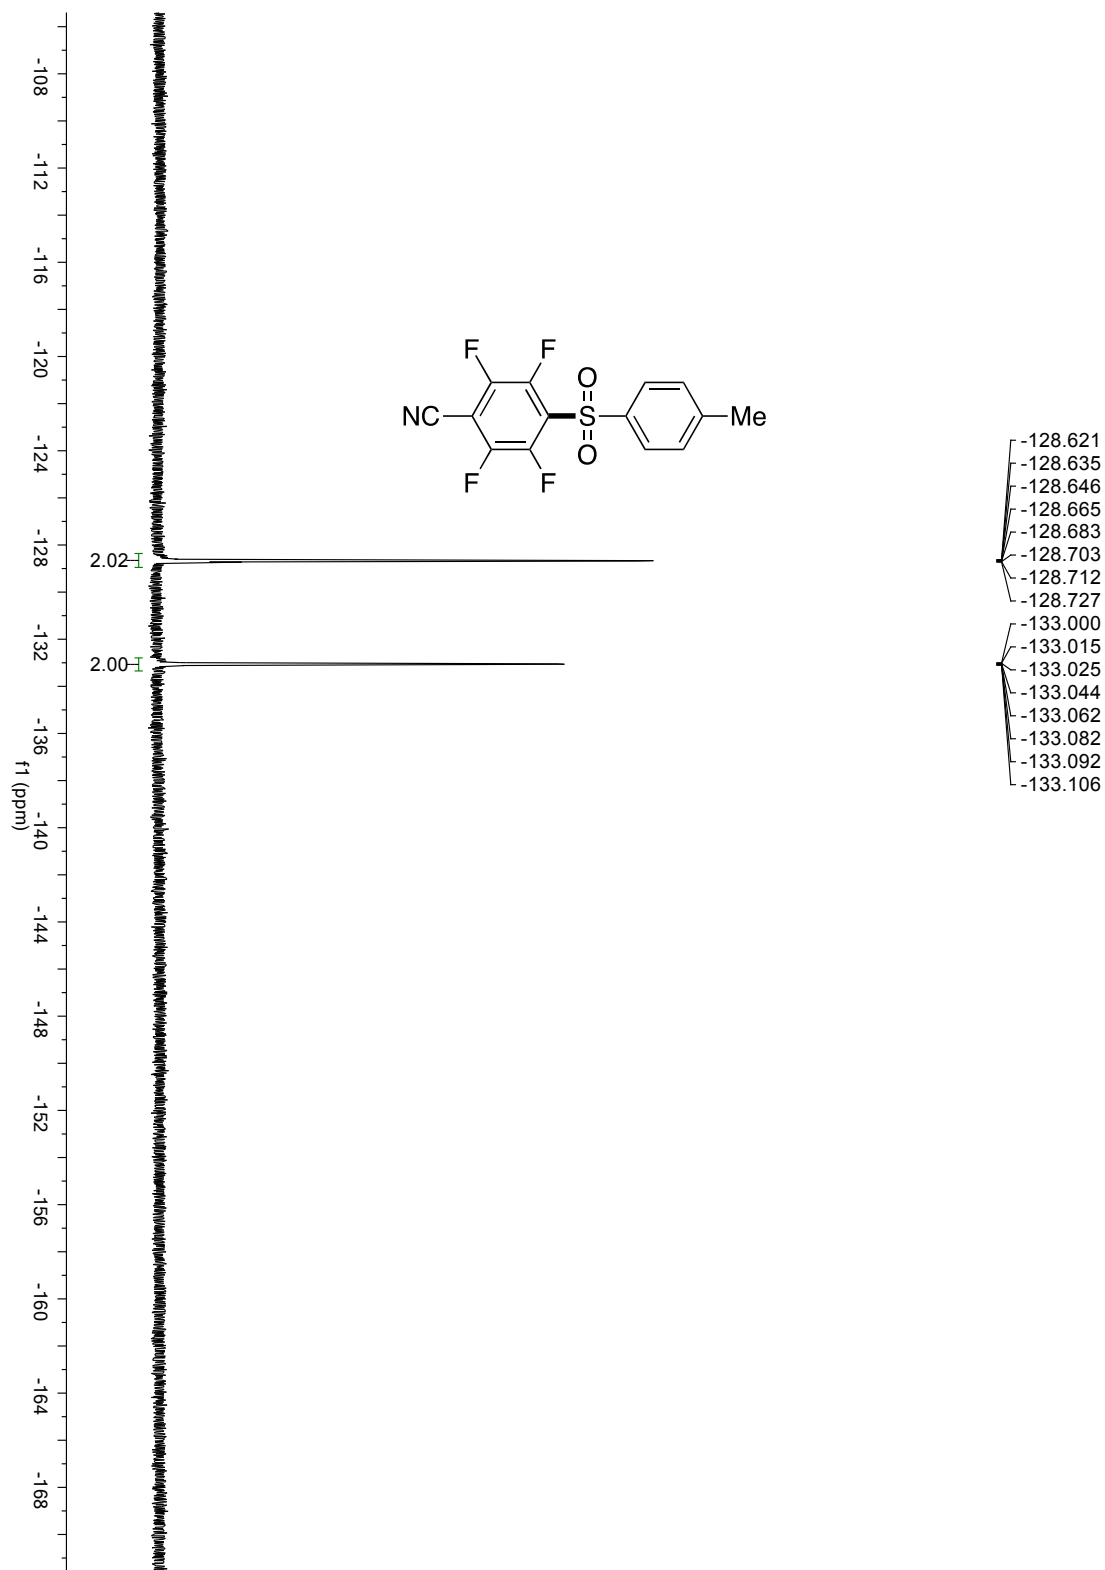

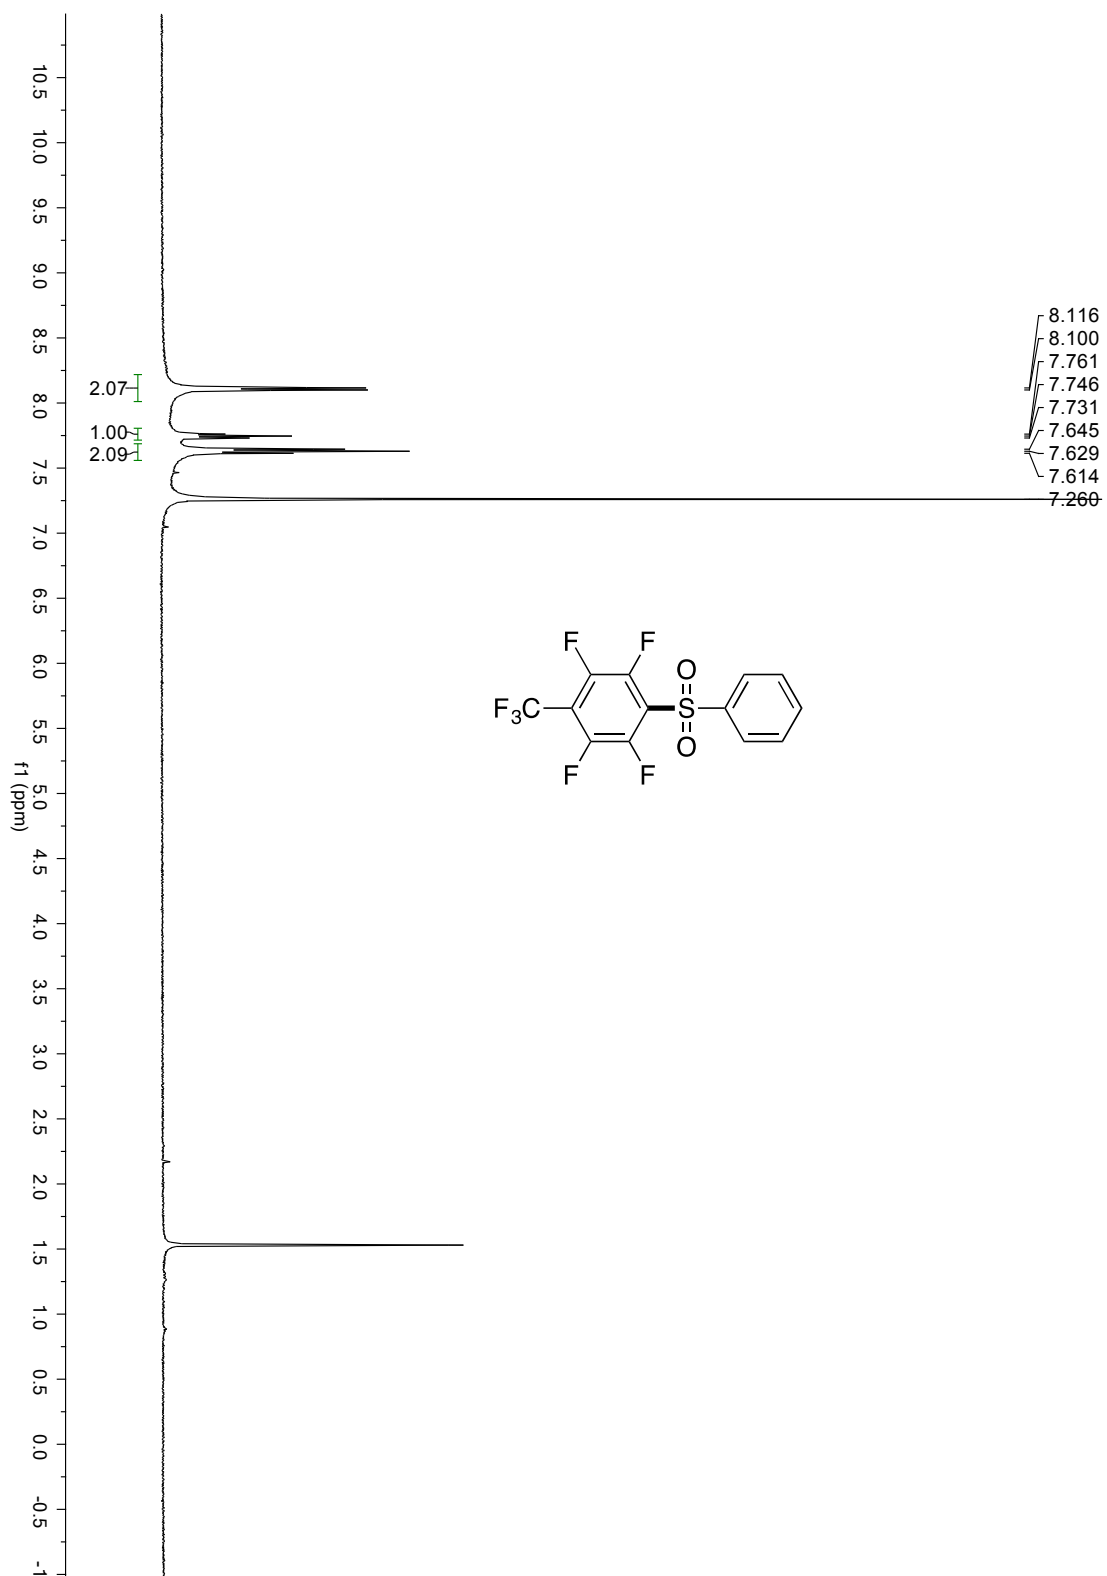



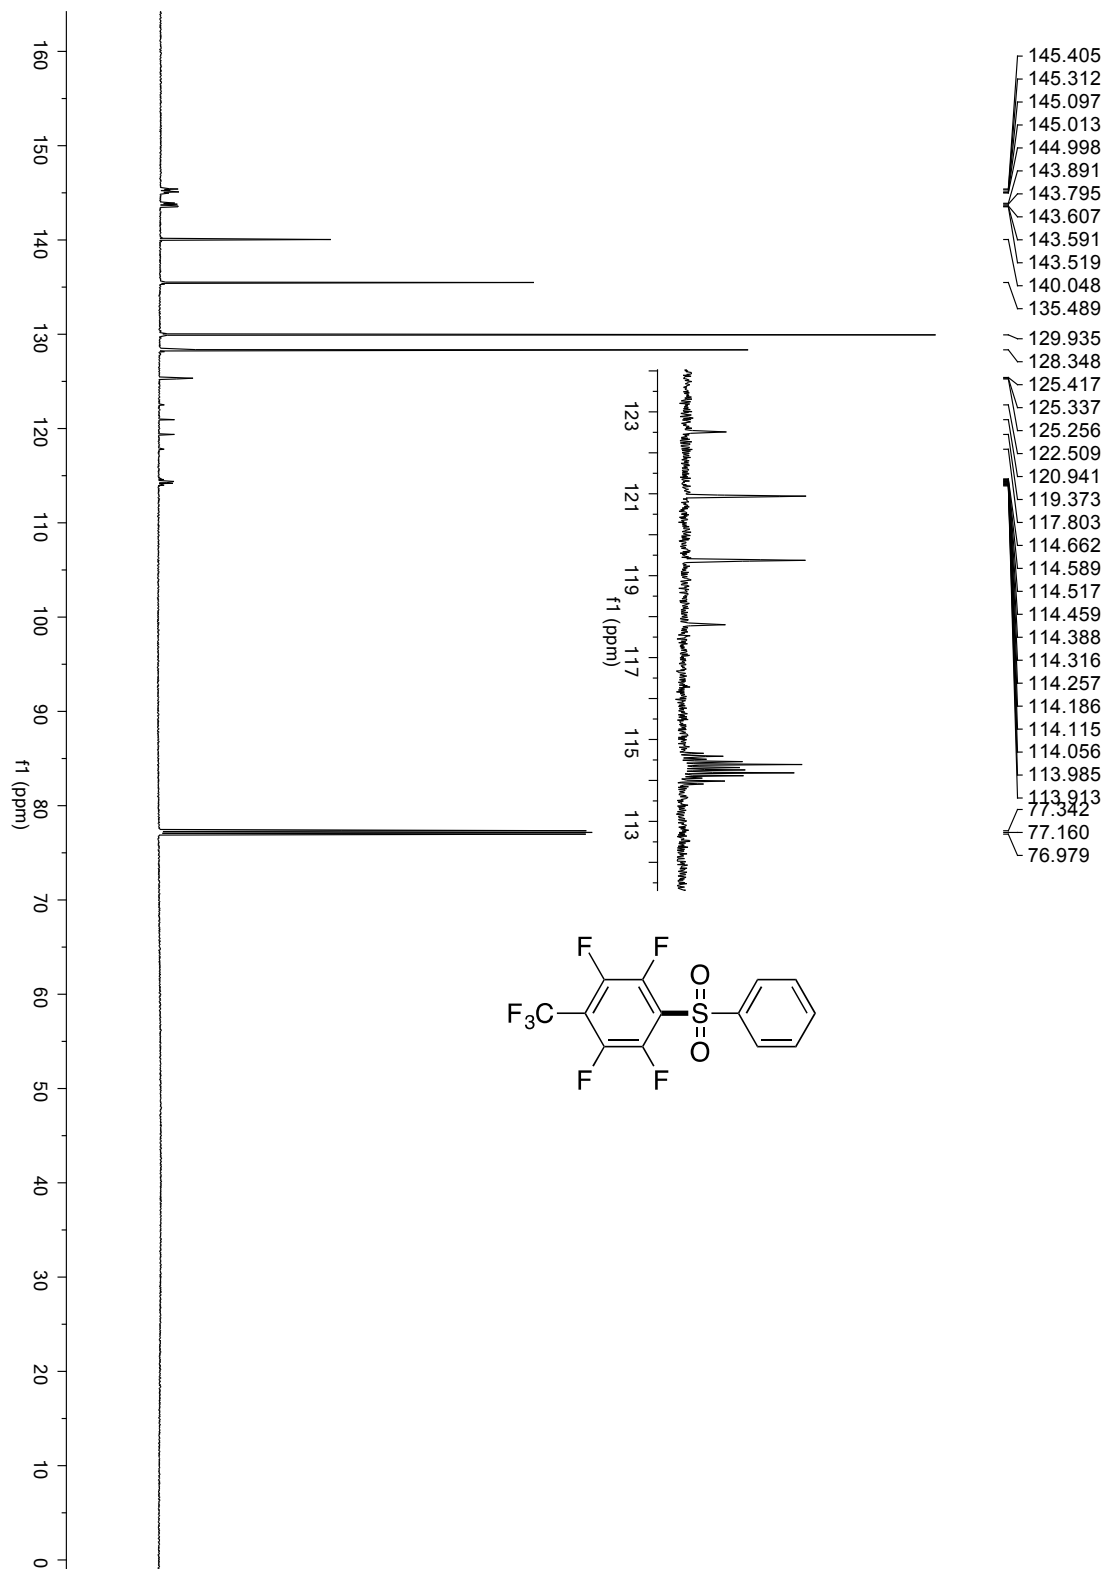

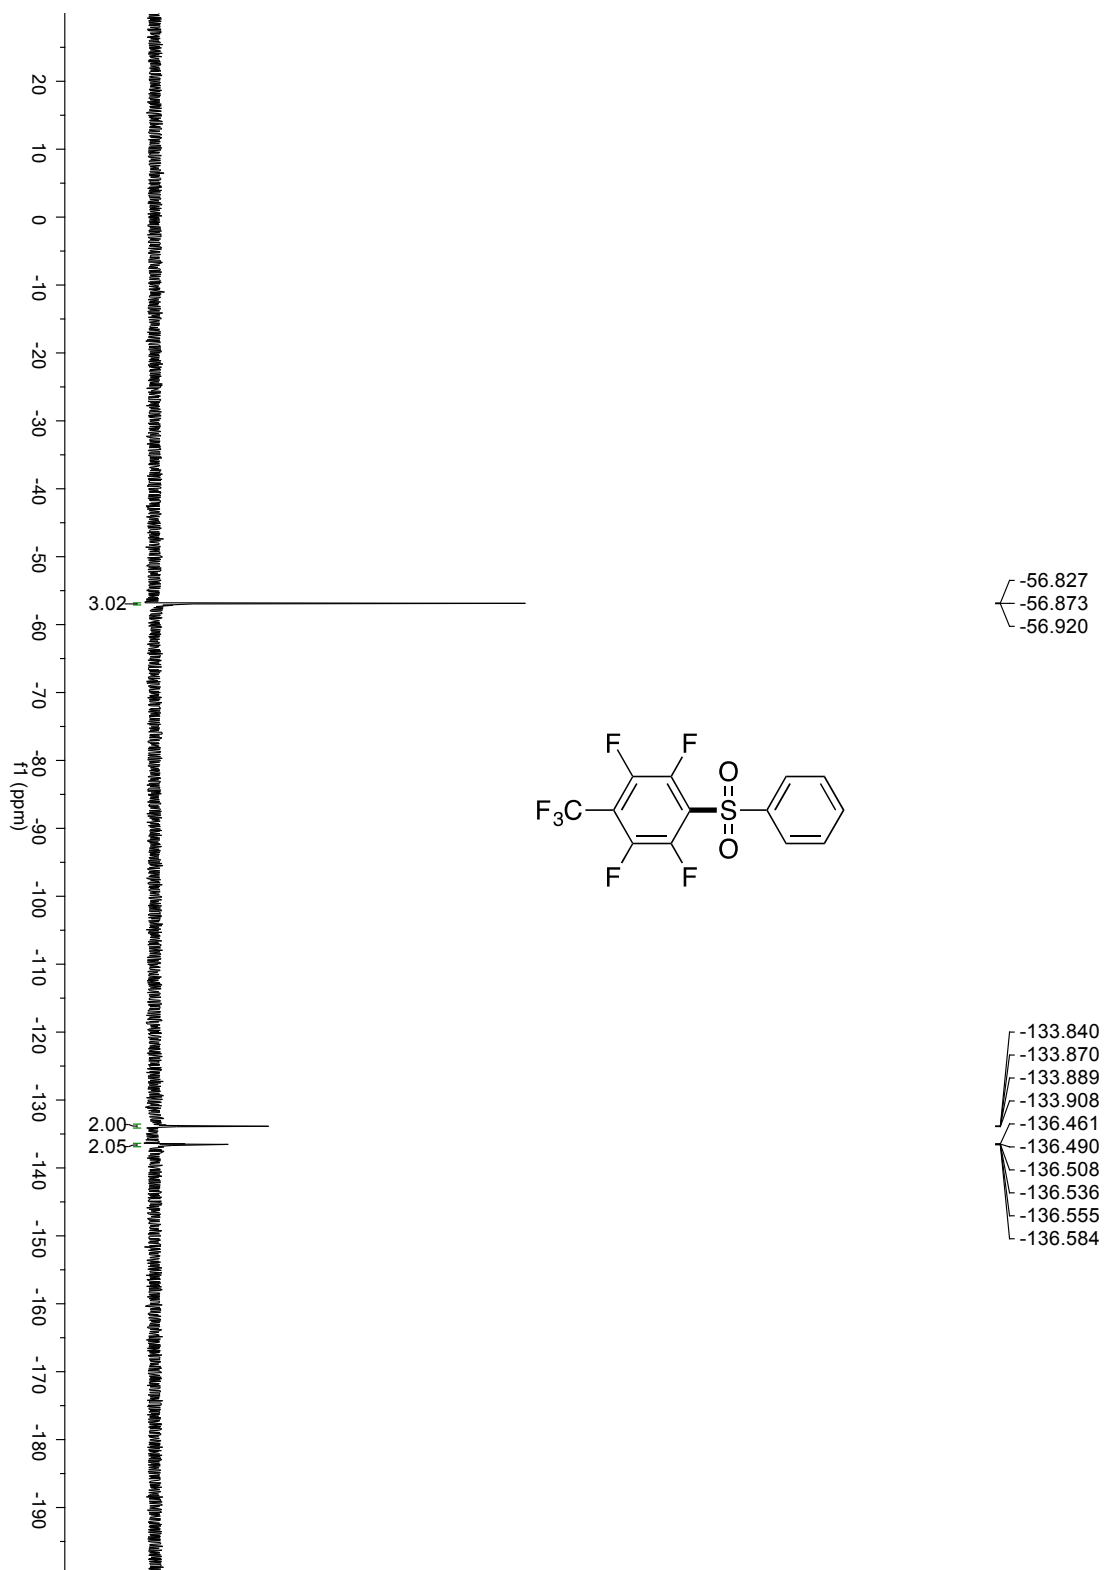

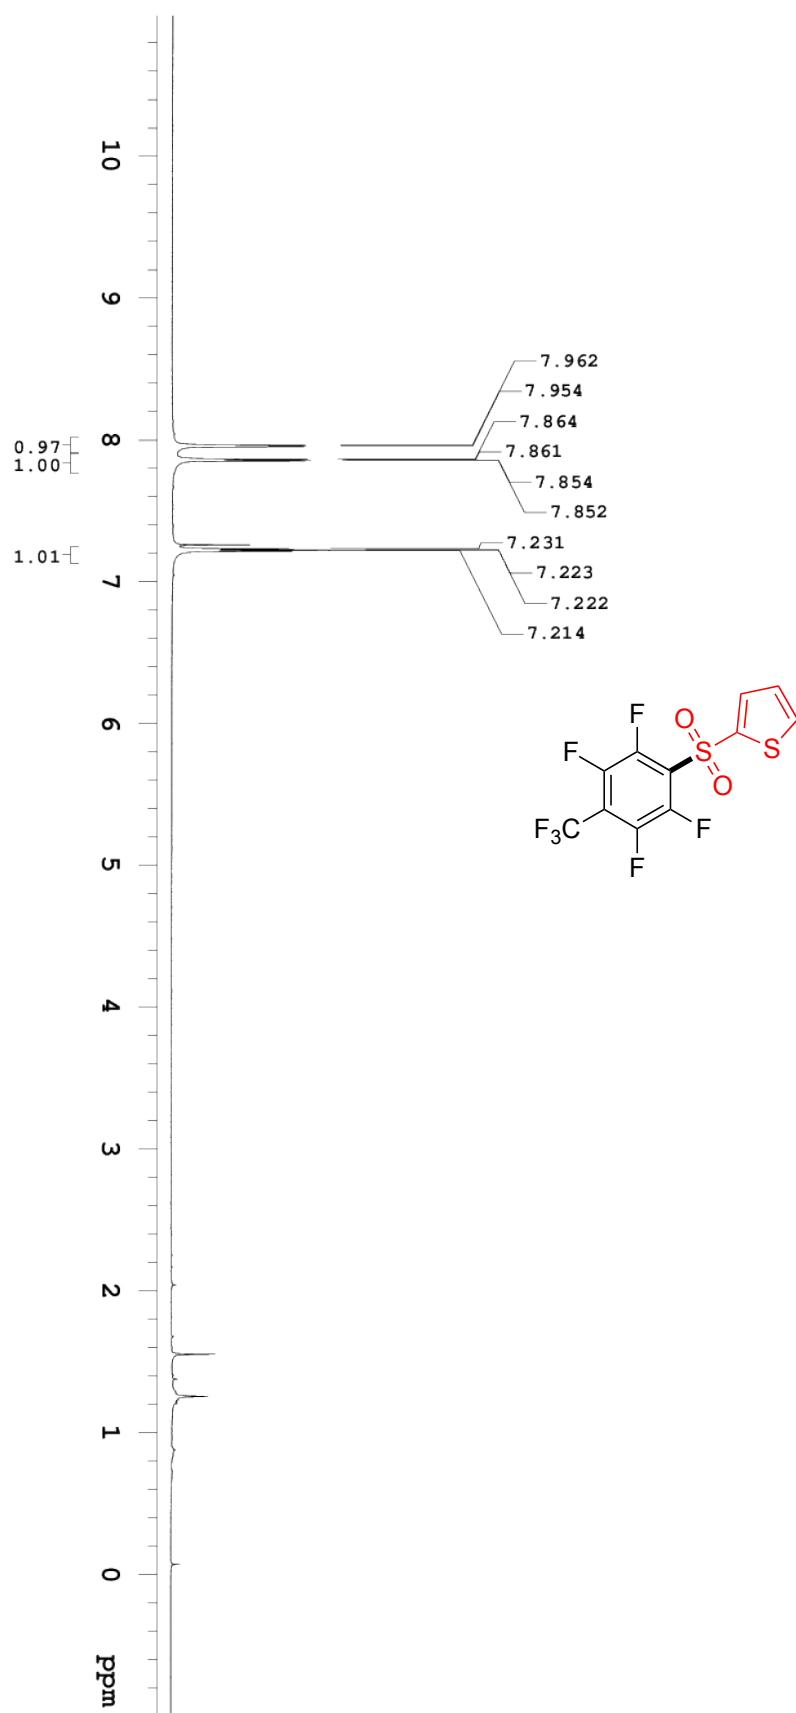

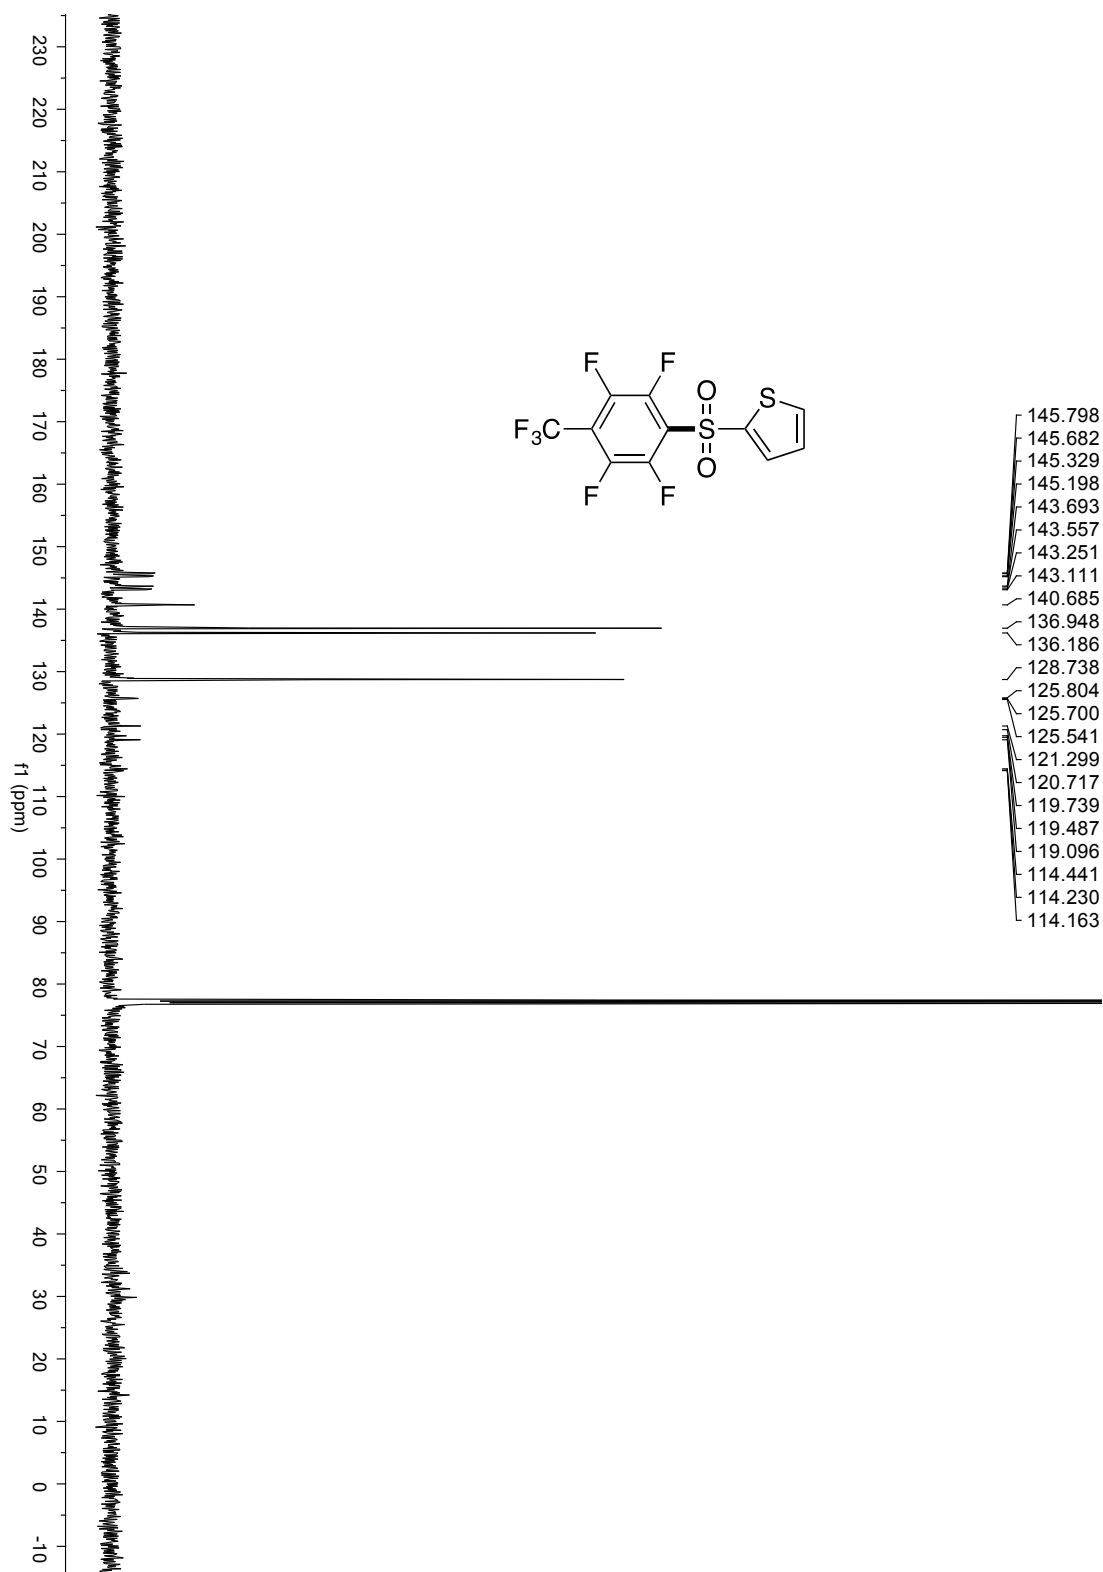

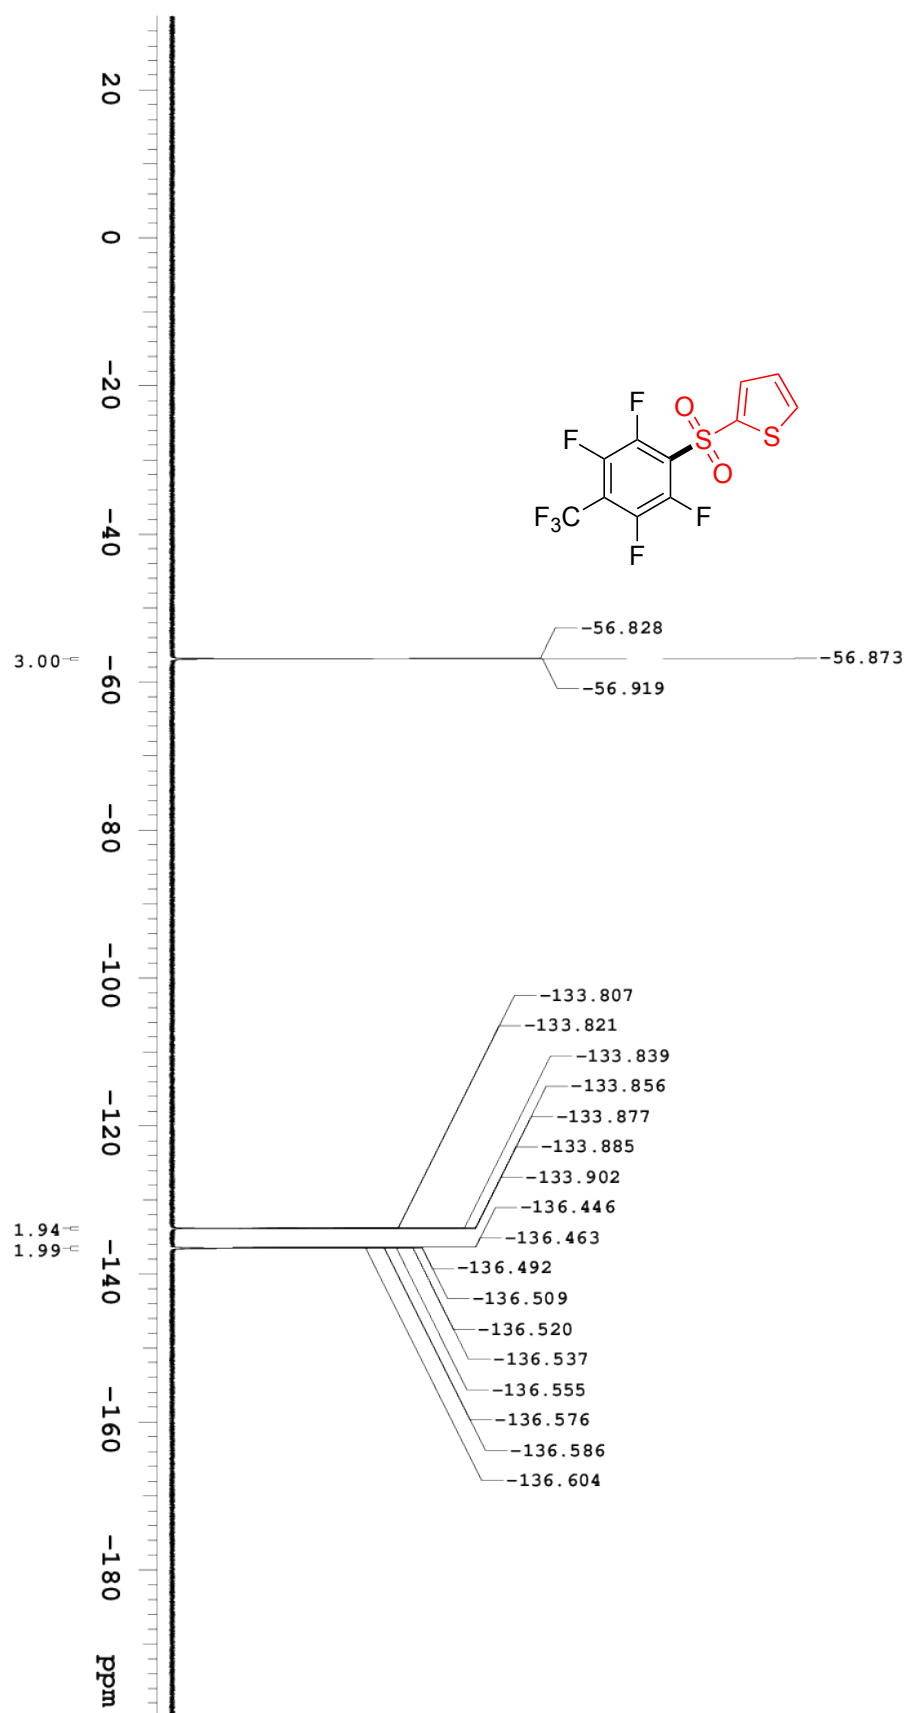

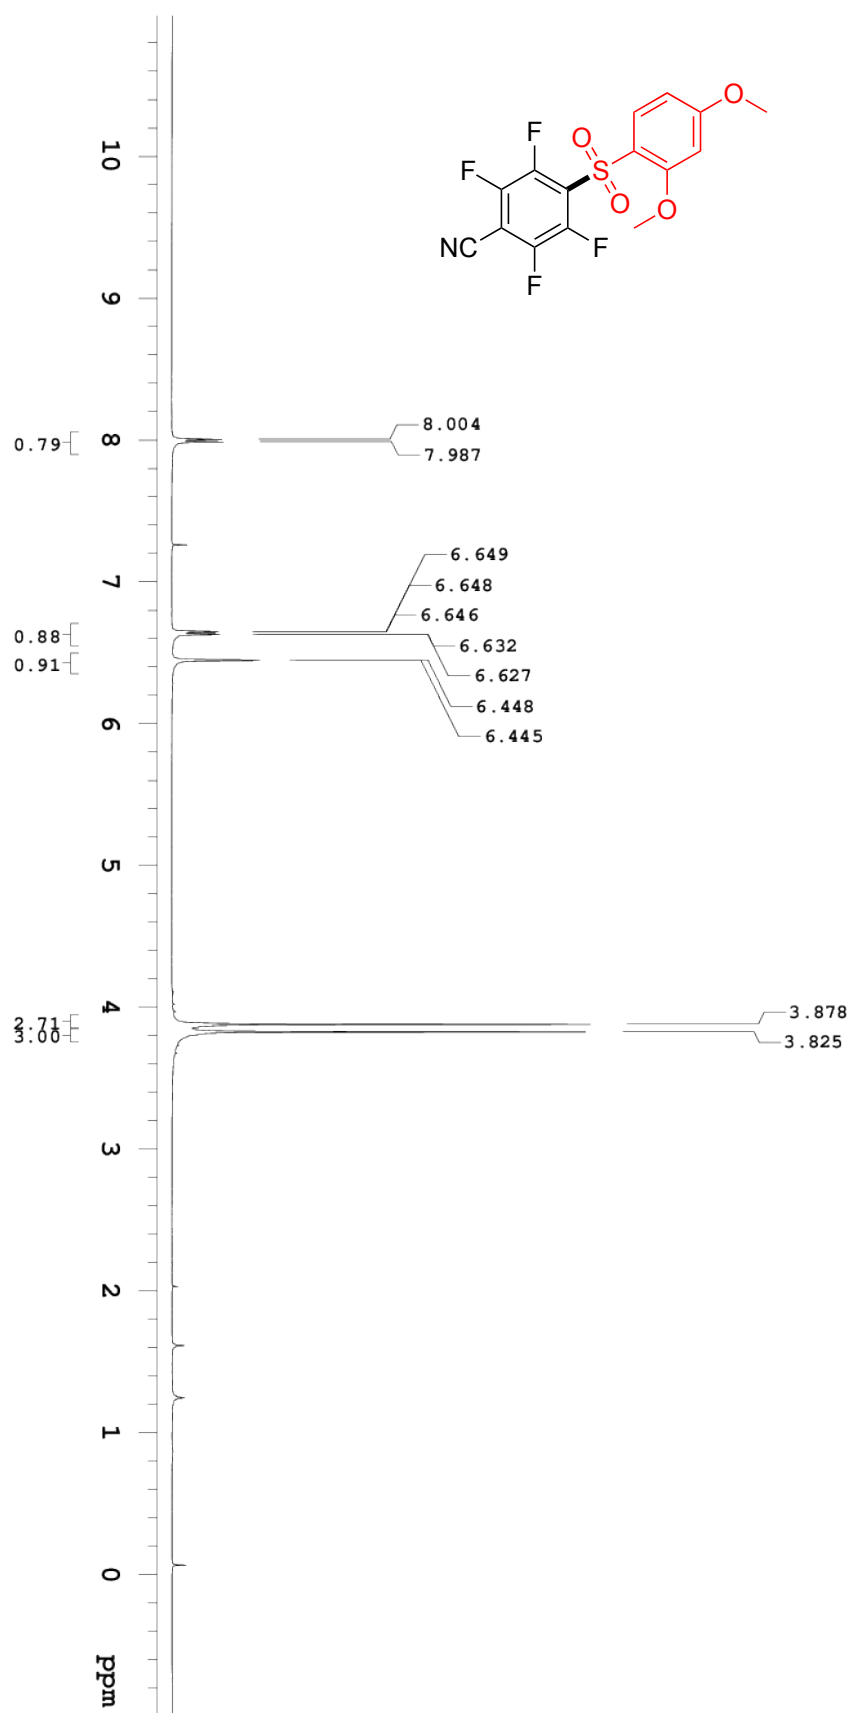

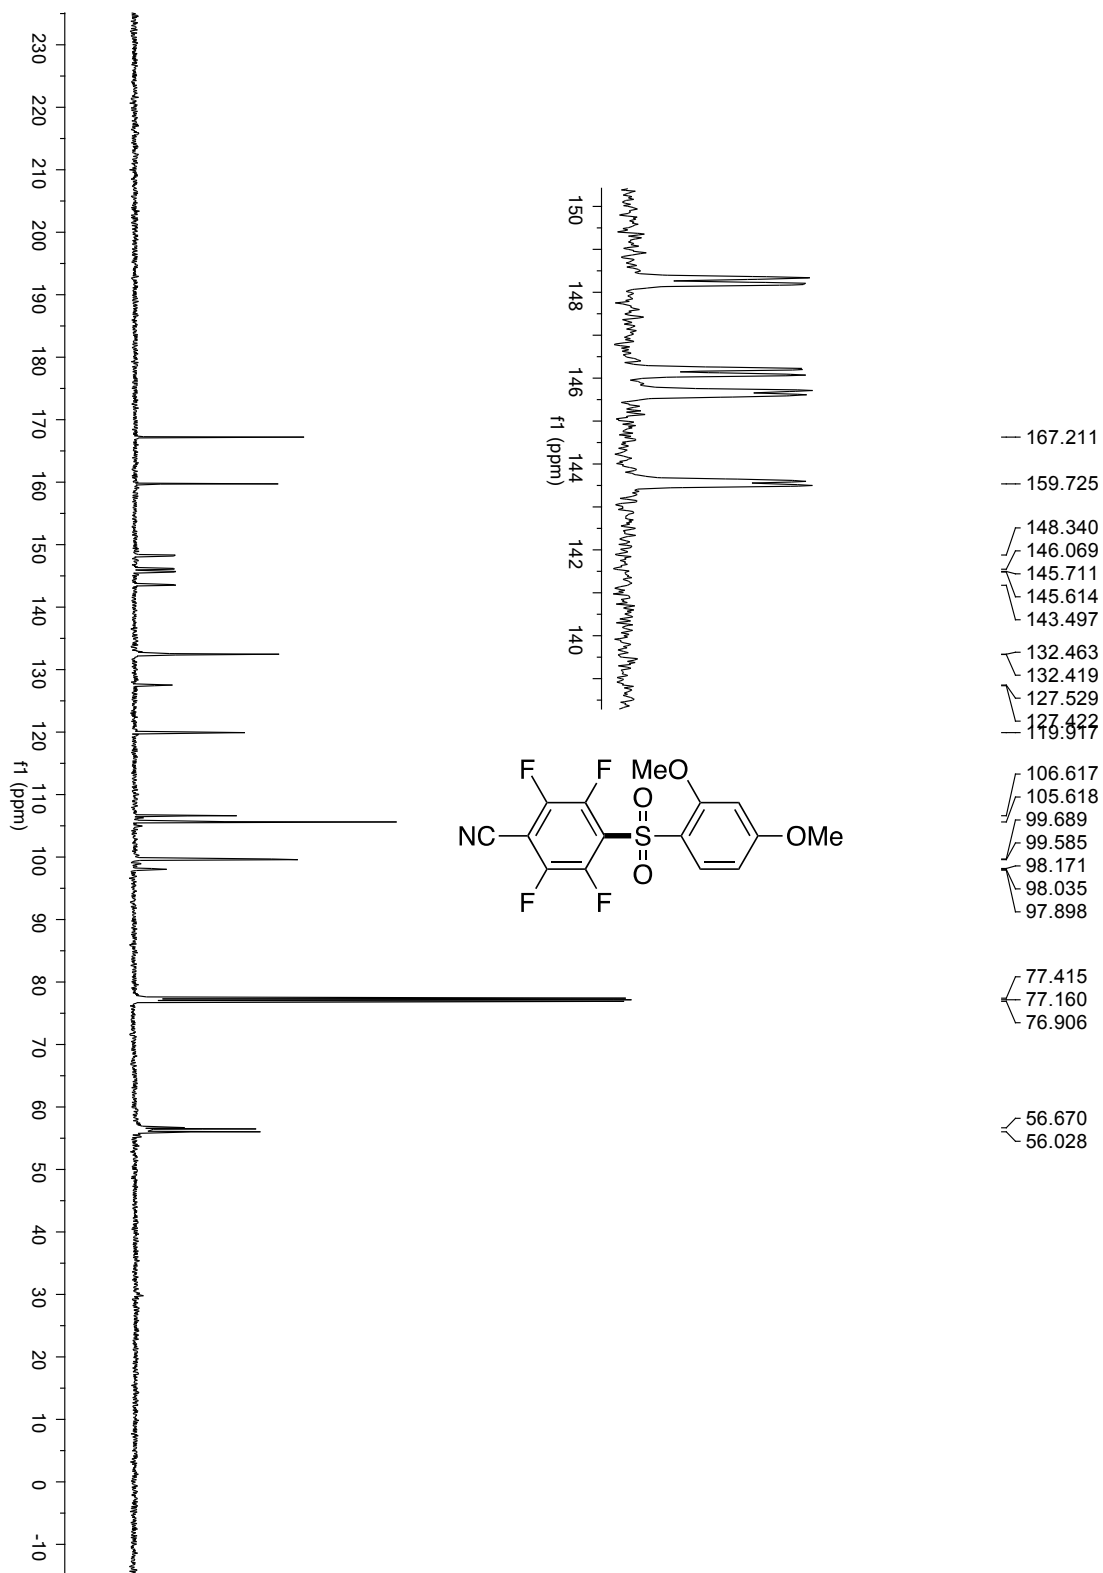

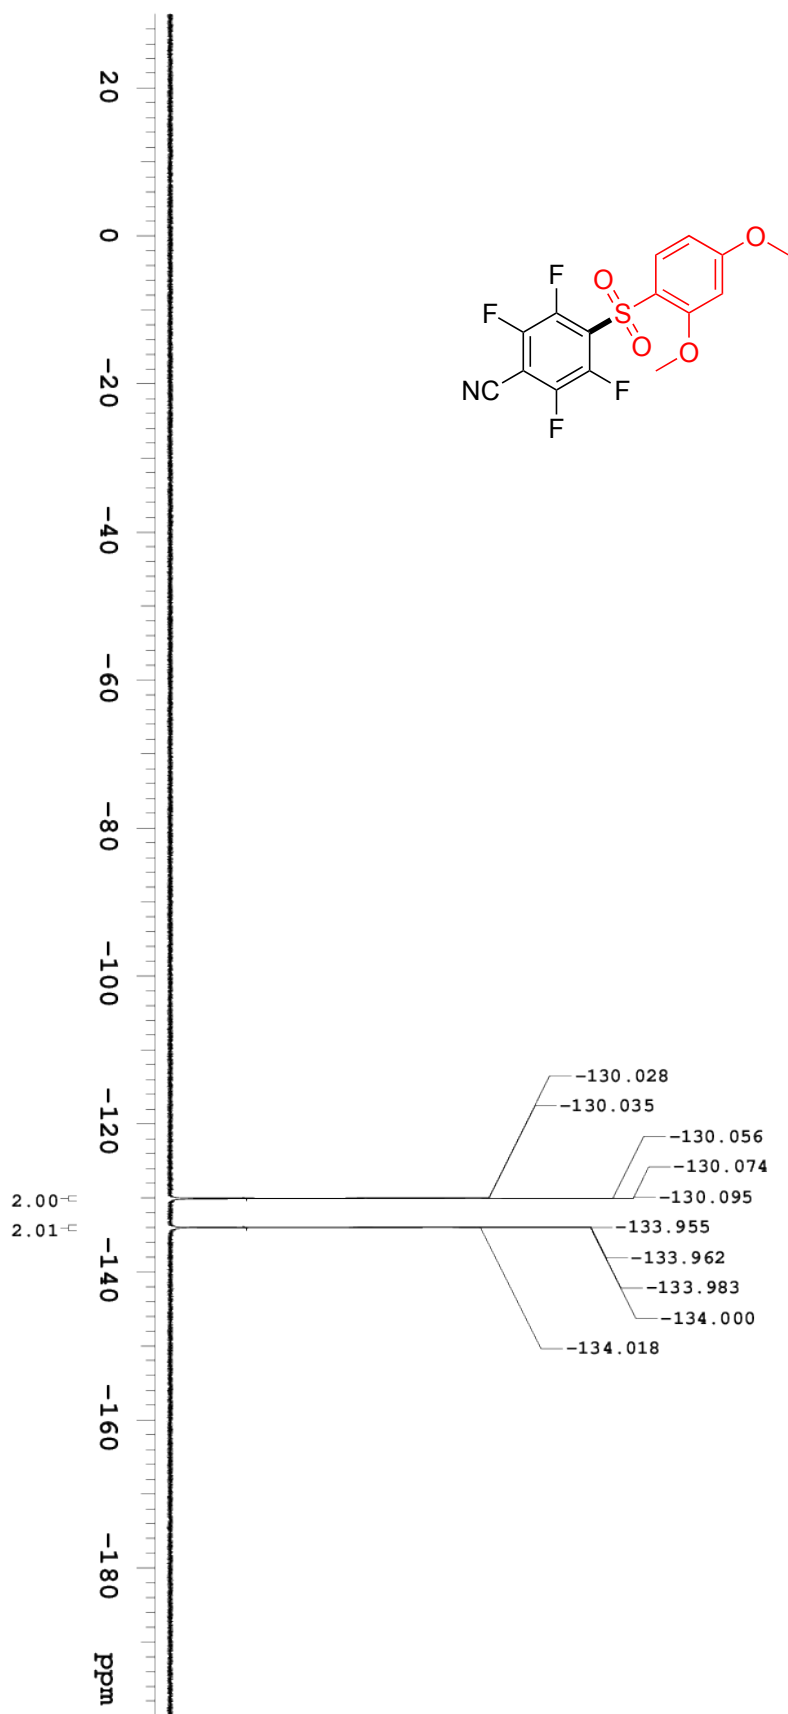



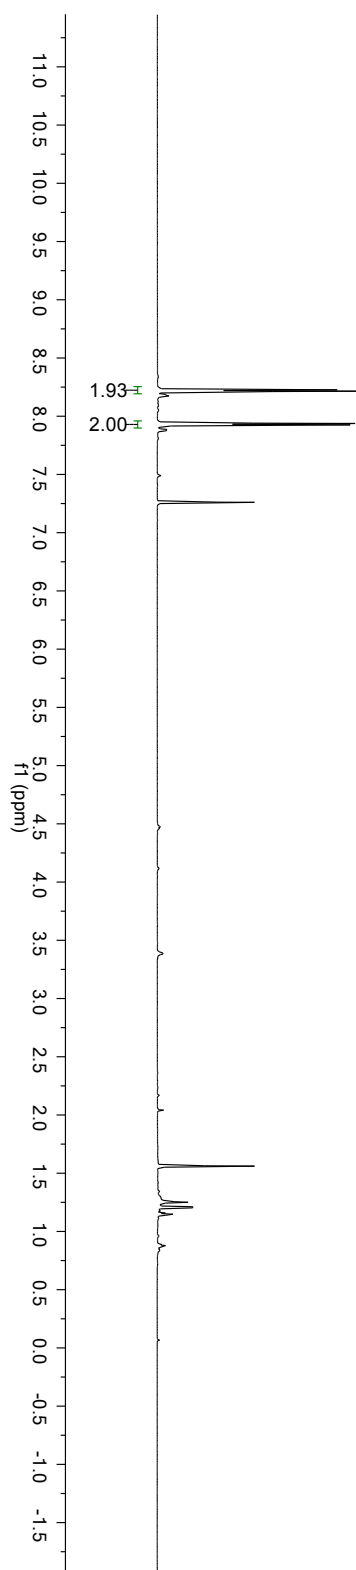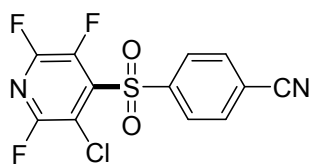

8.227  
8.215  
7.938  
7.926  
7.260

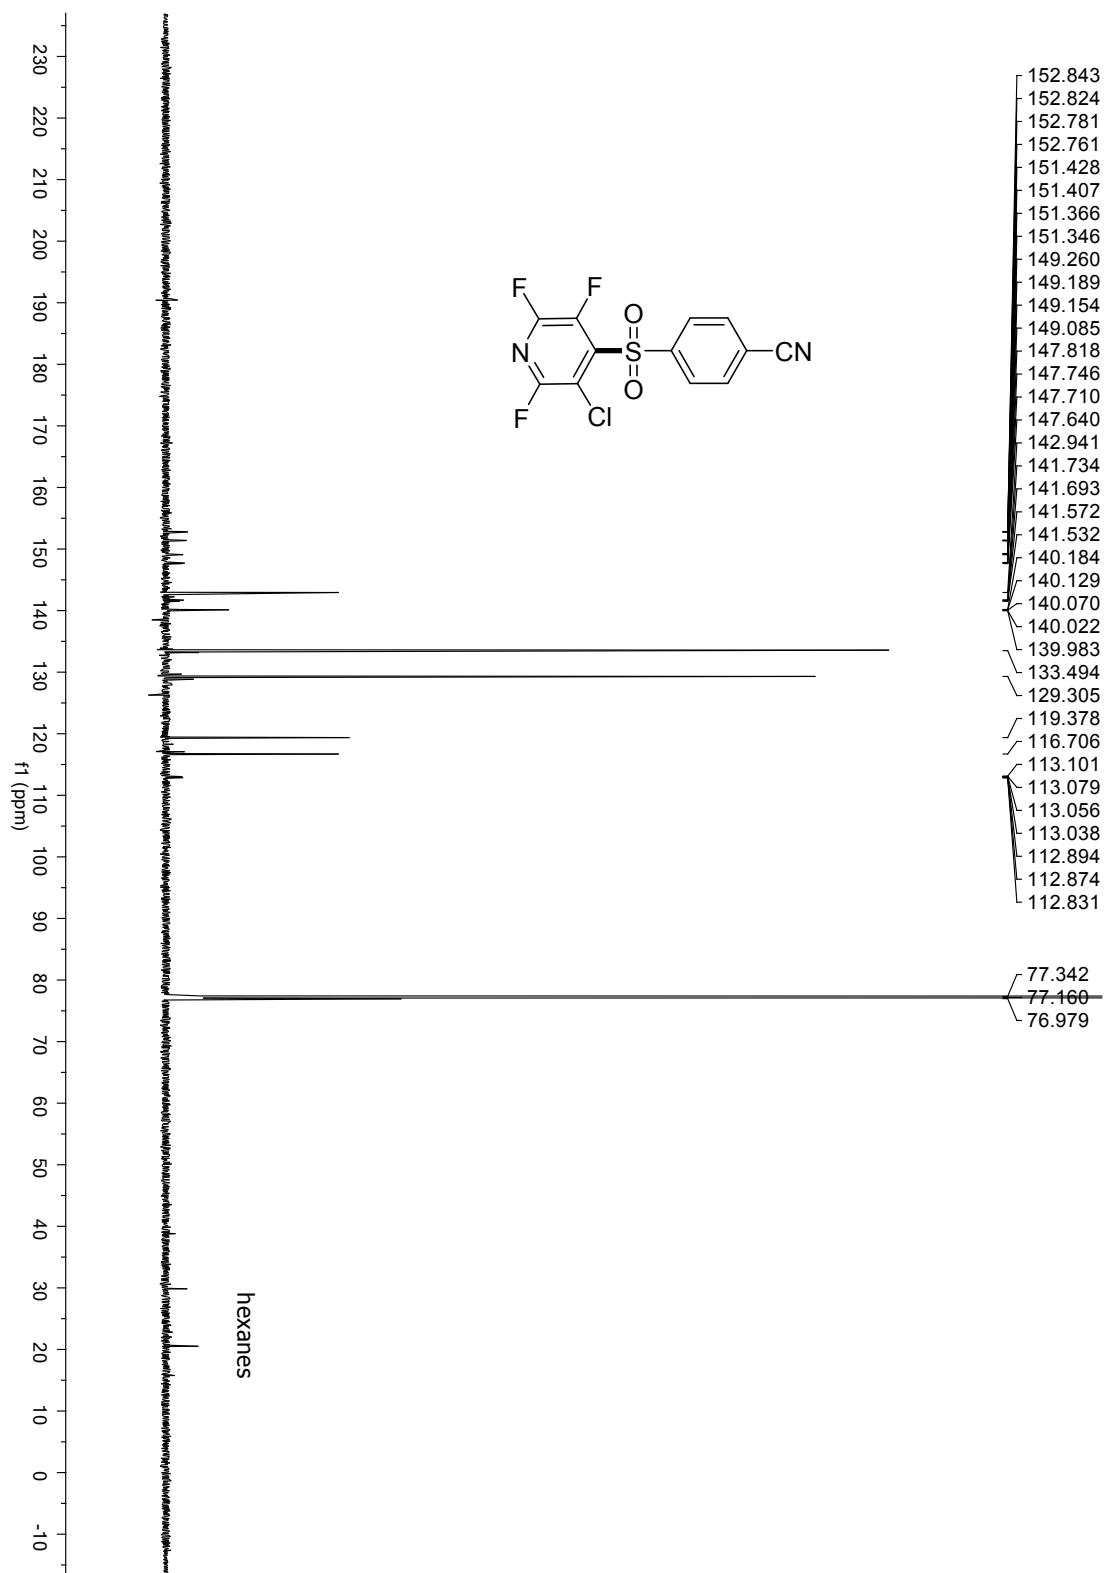

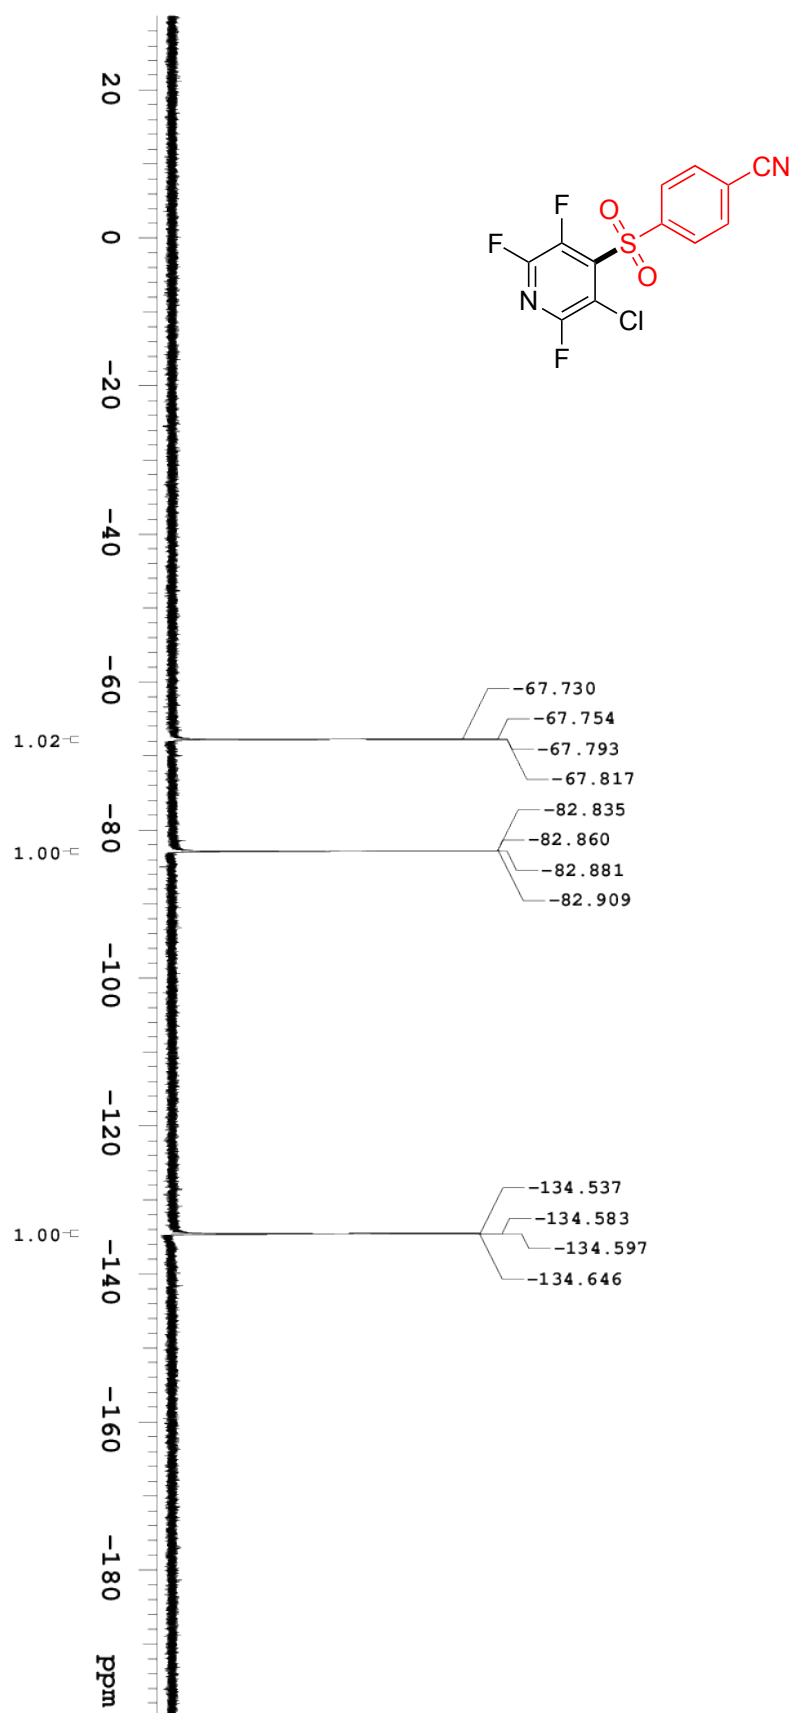

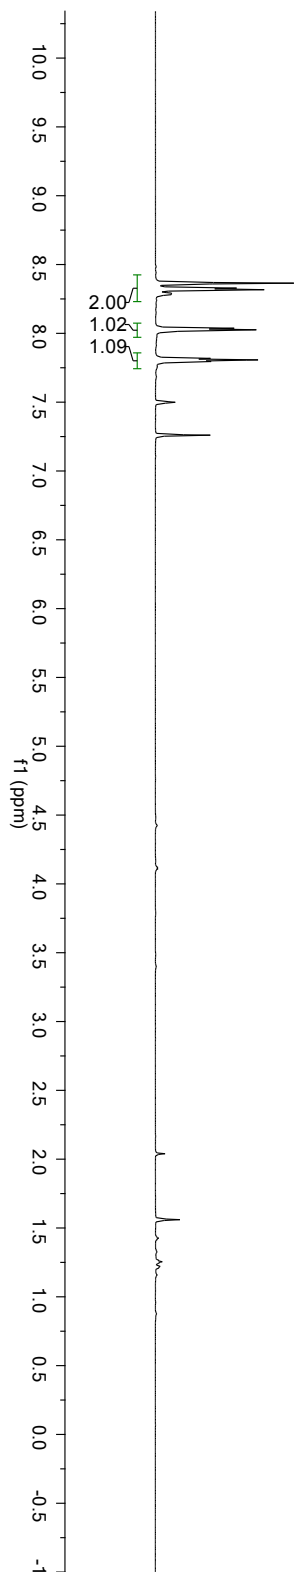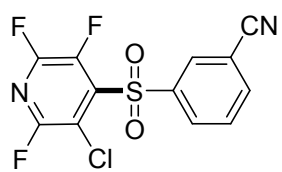

8.364  
8.328  
8.317  
8.037  
8.026  
7.818  
7.807  
7.796  
7.260

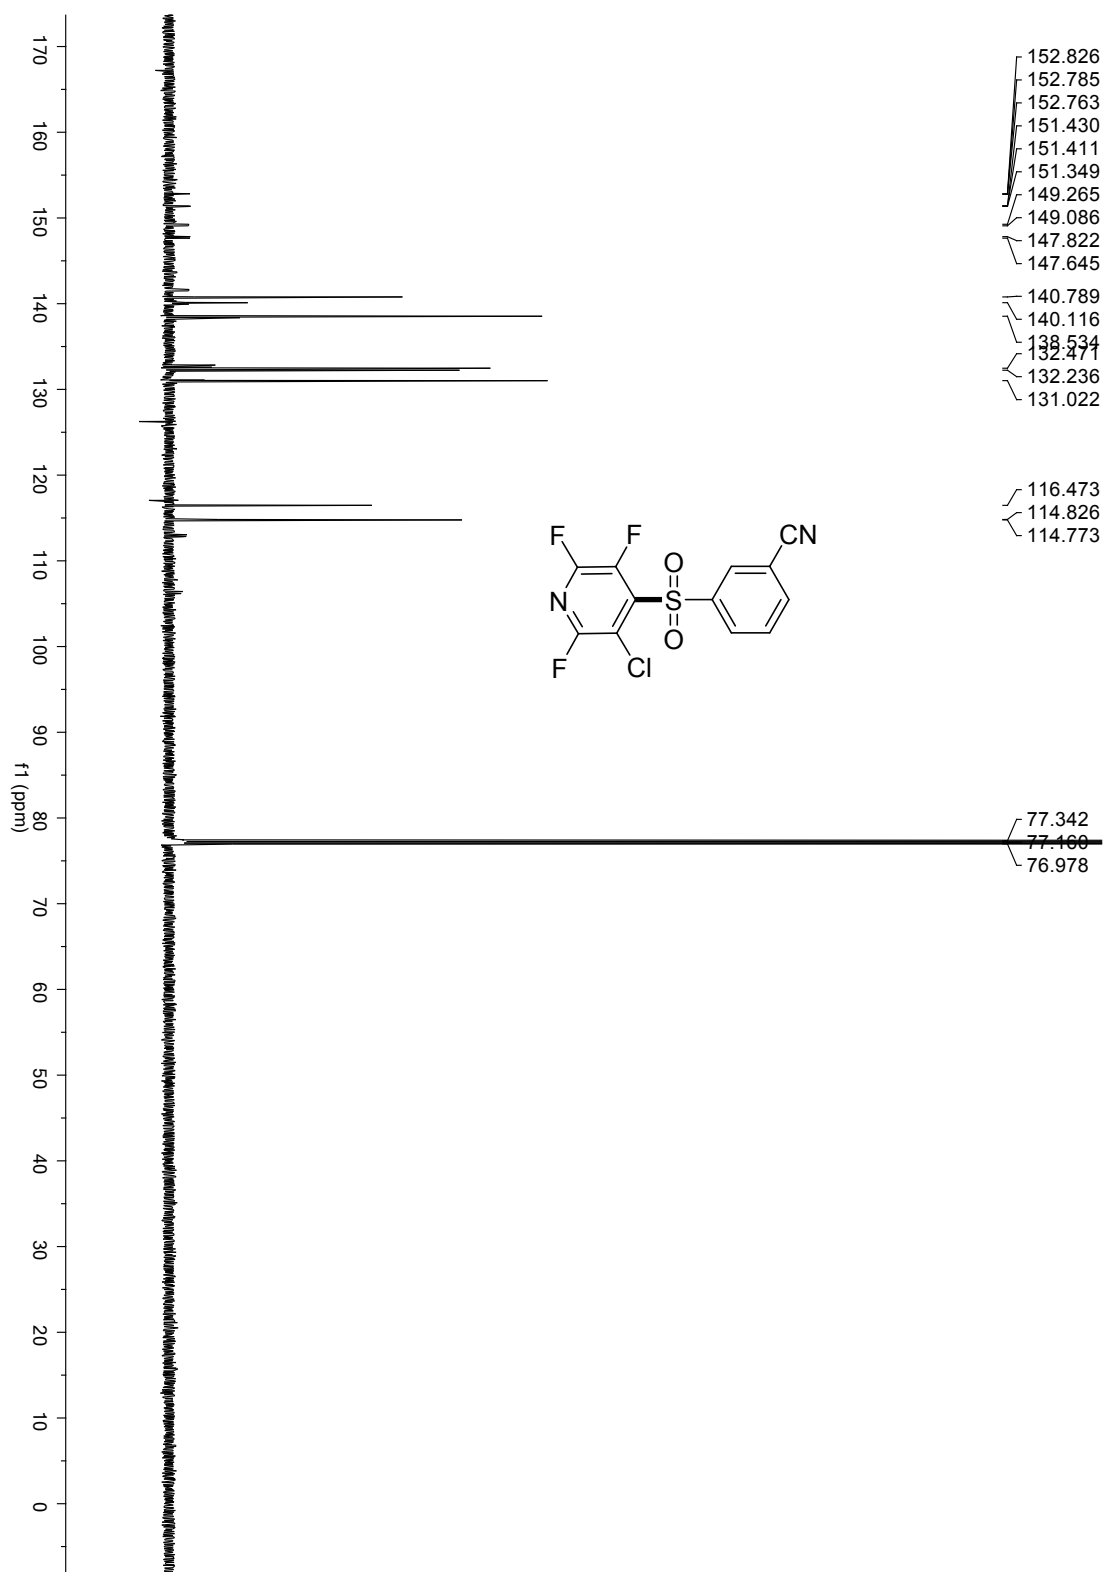

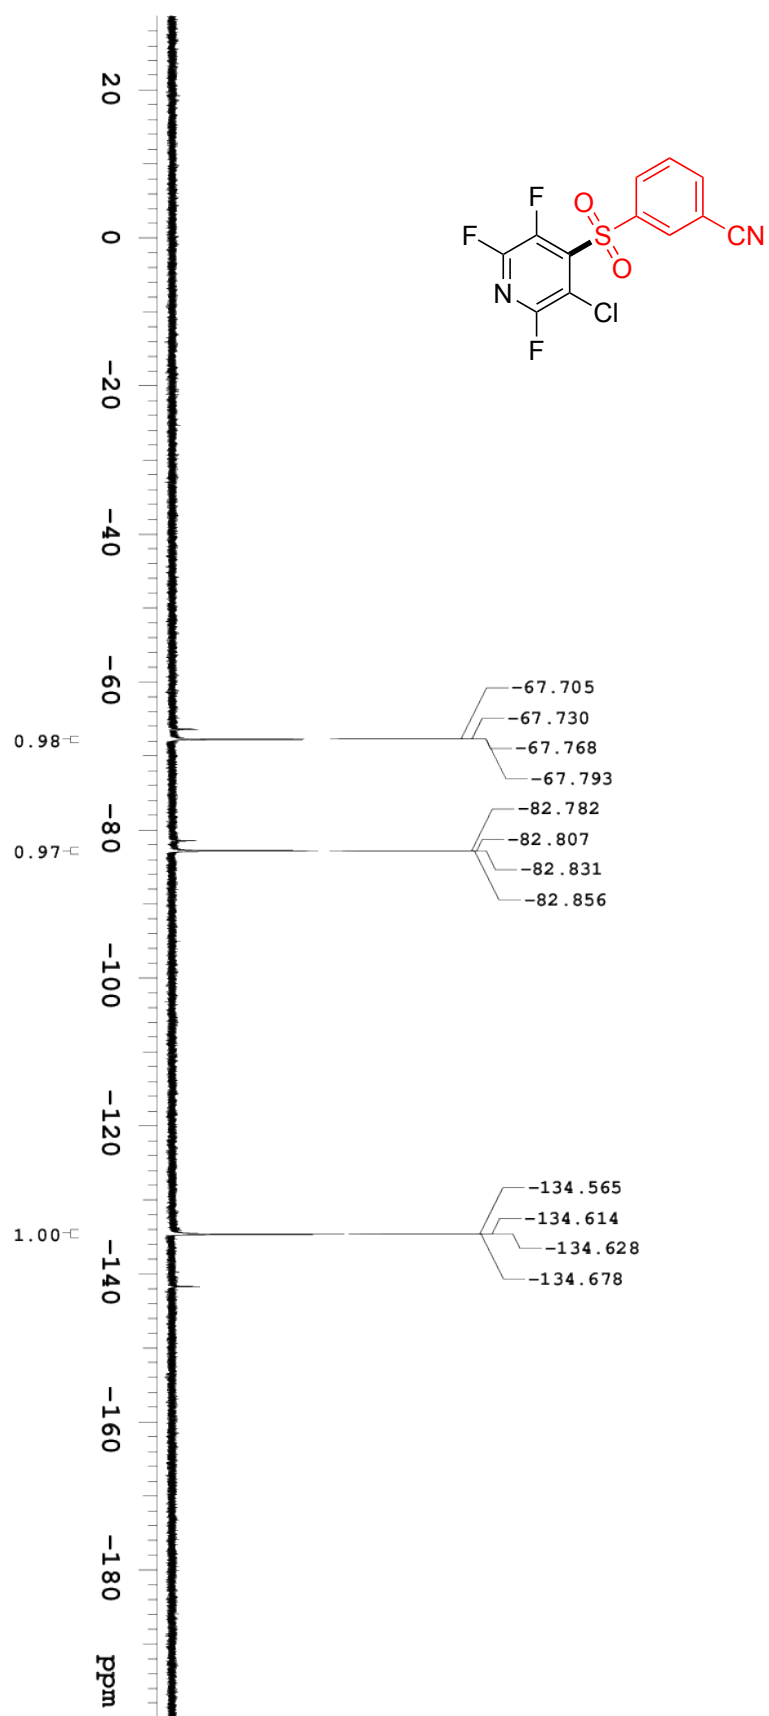

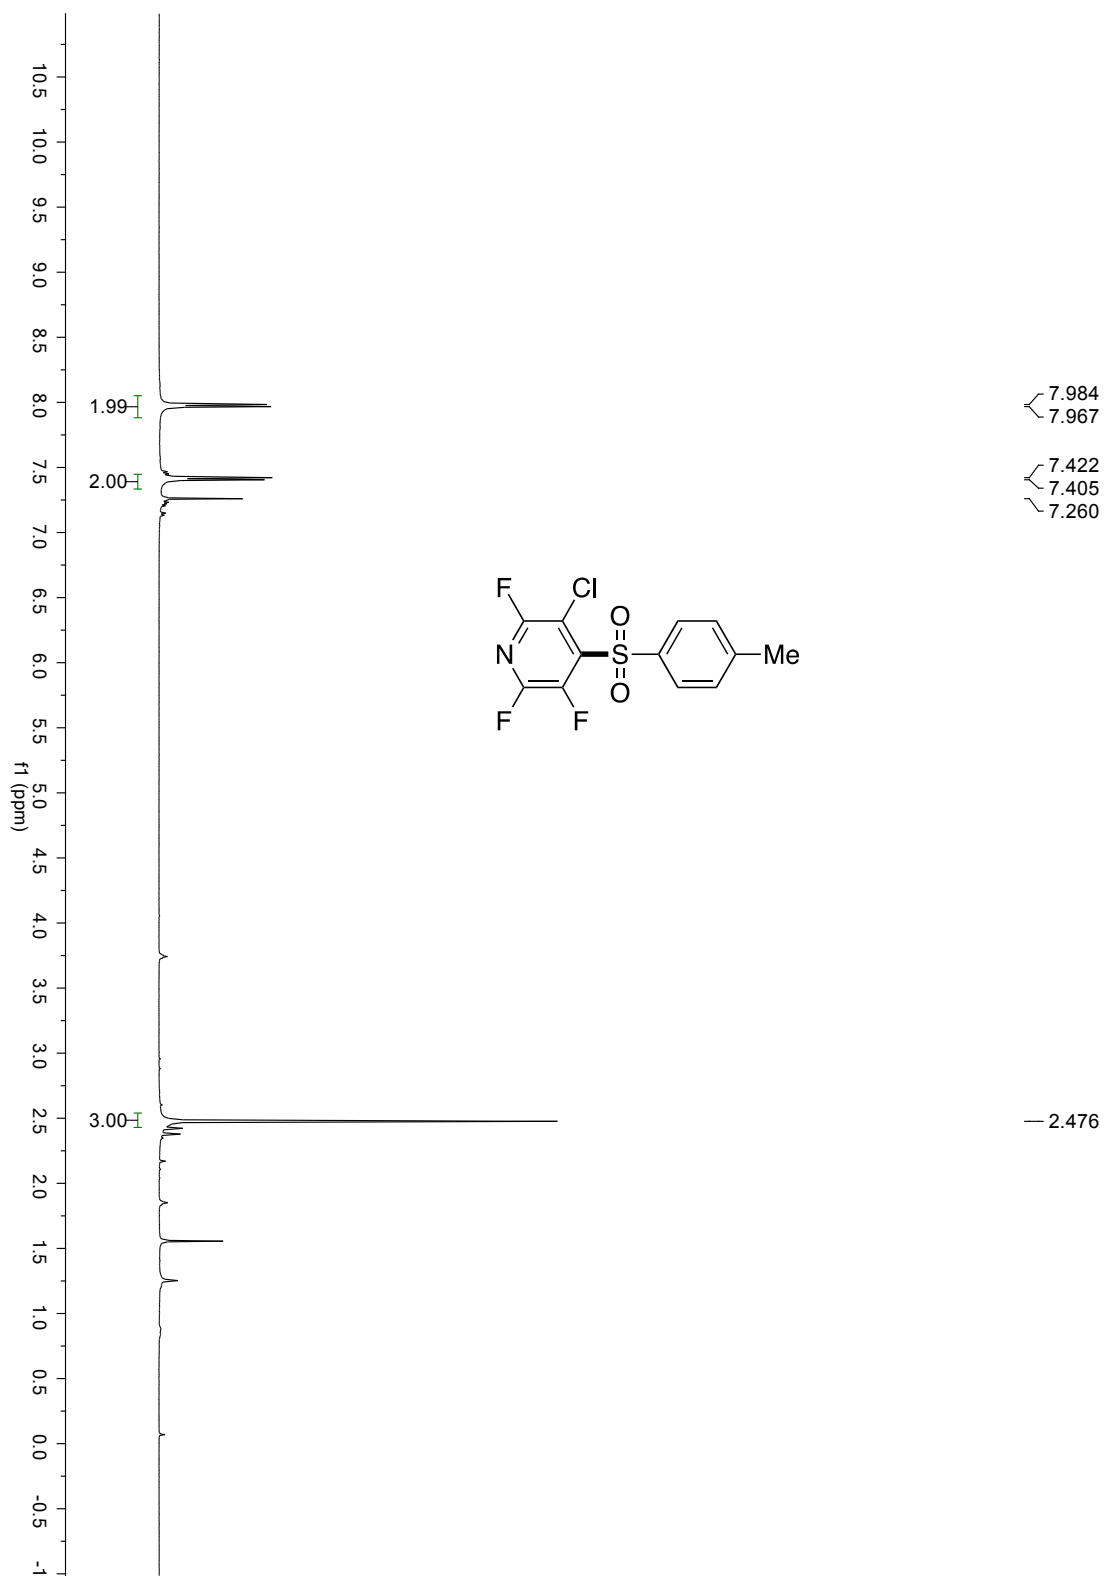

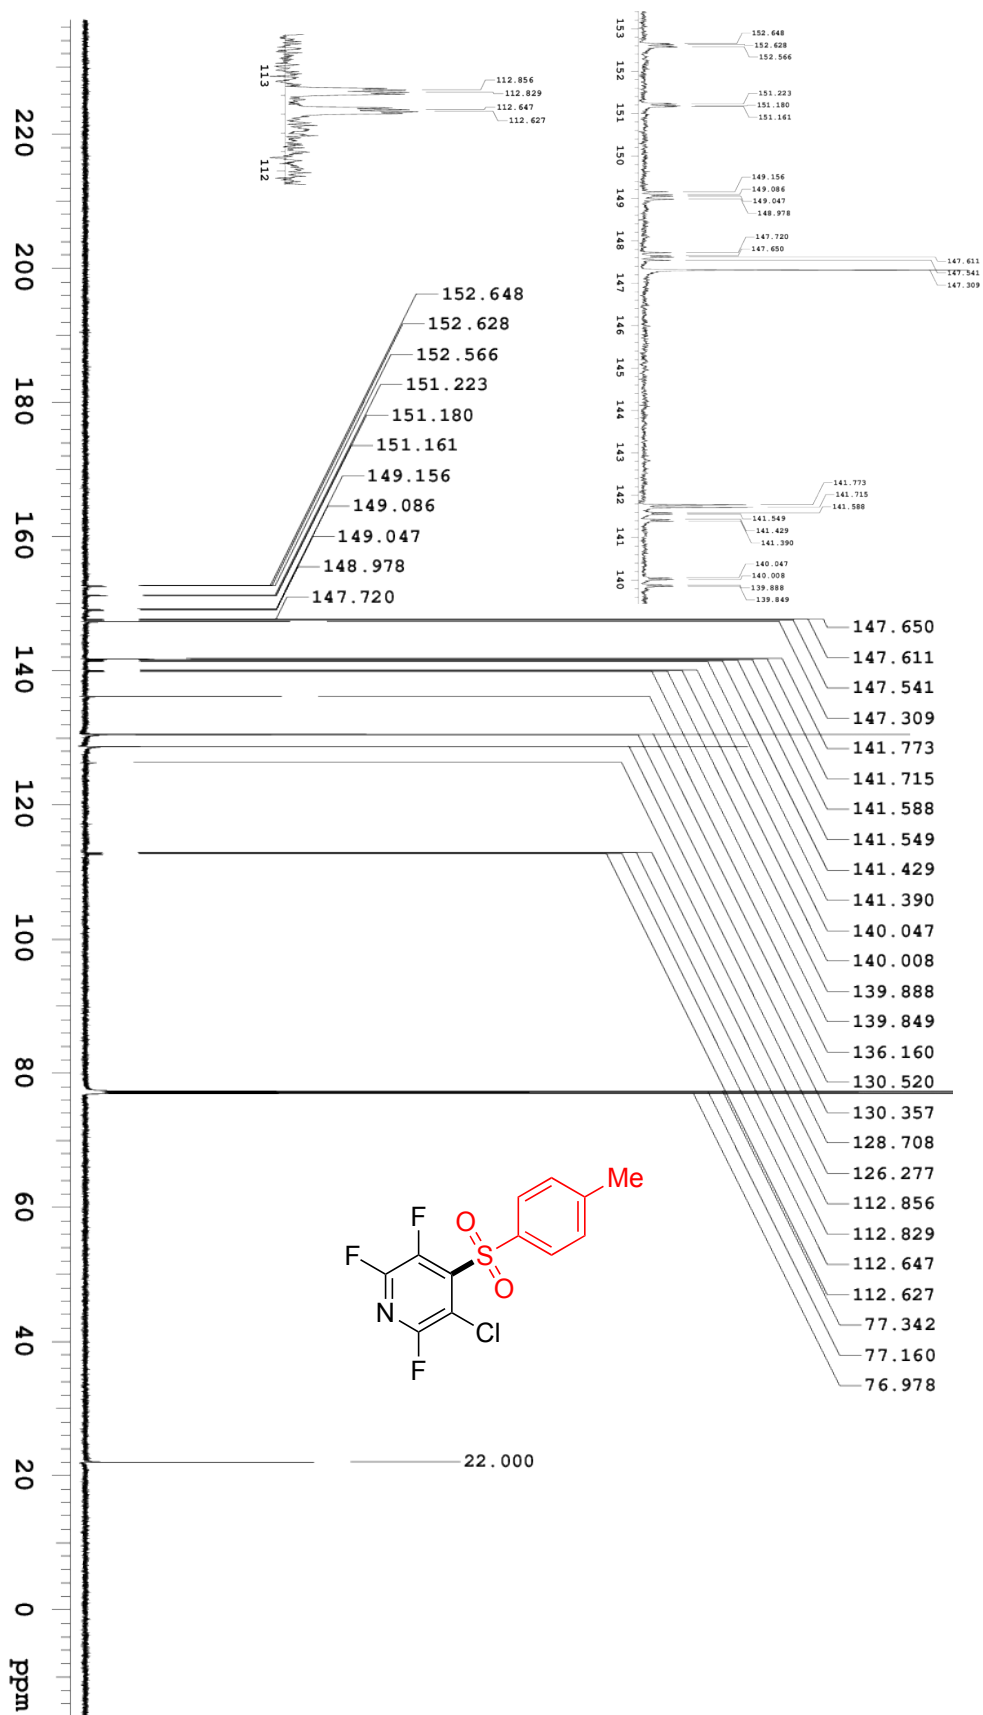



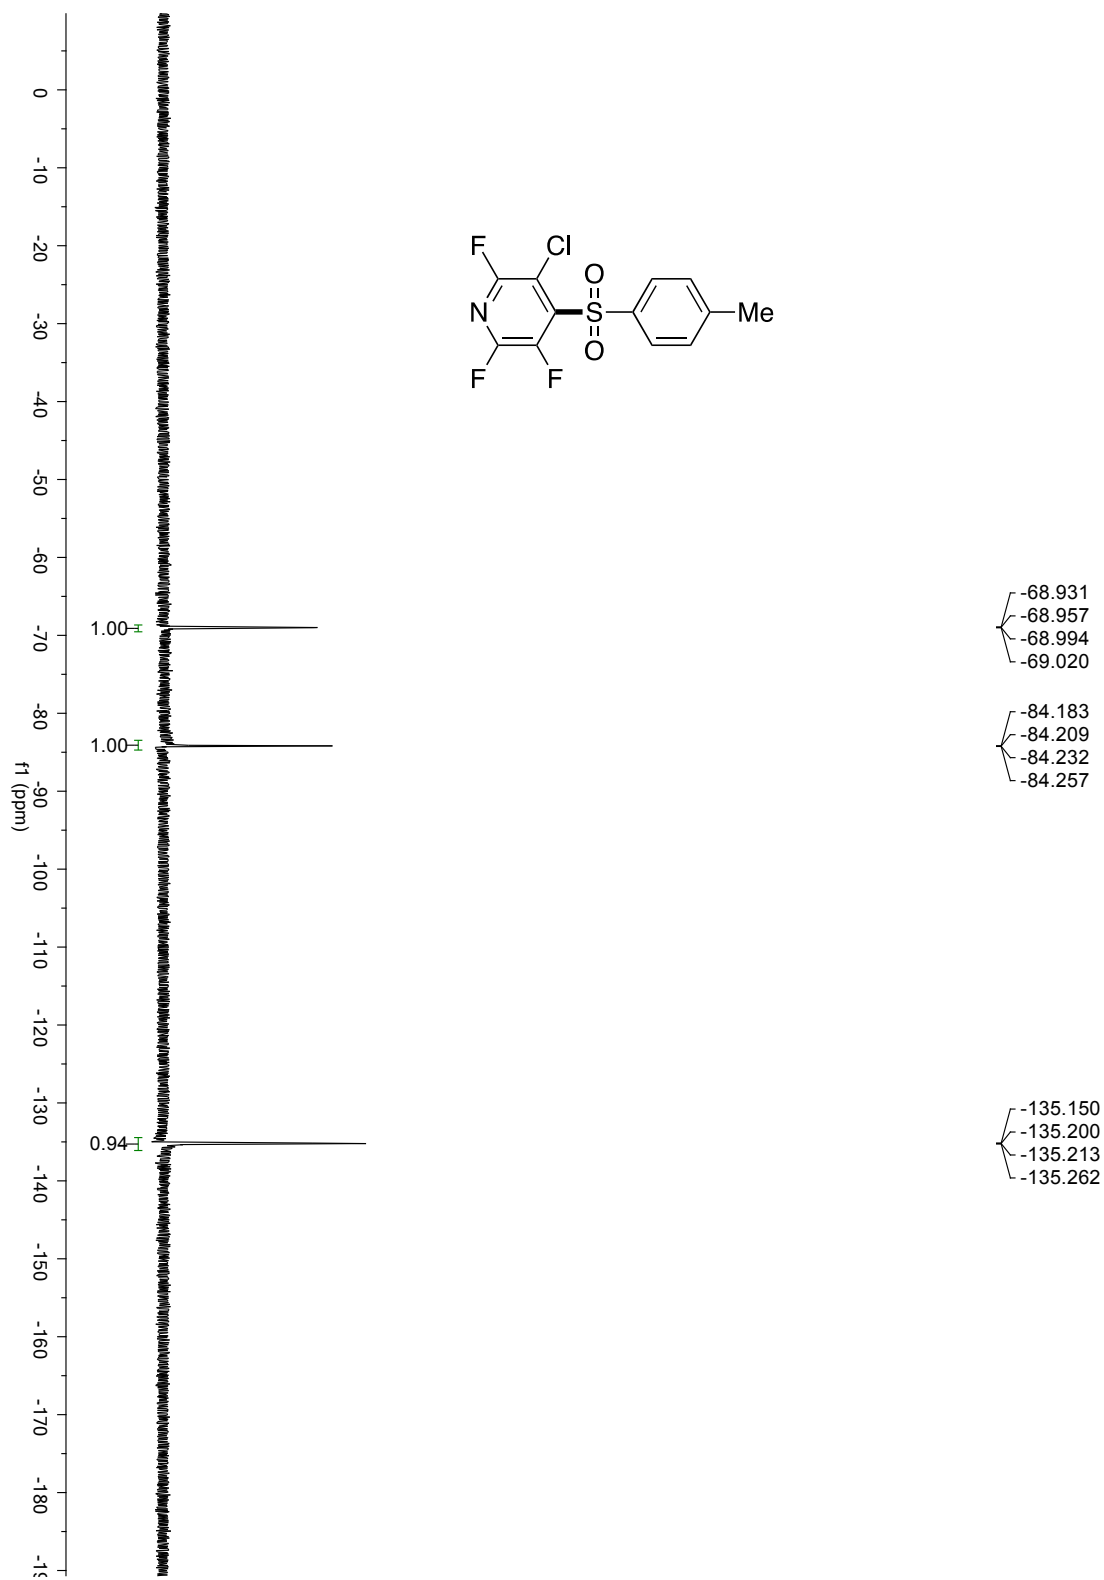

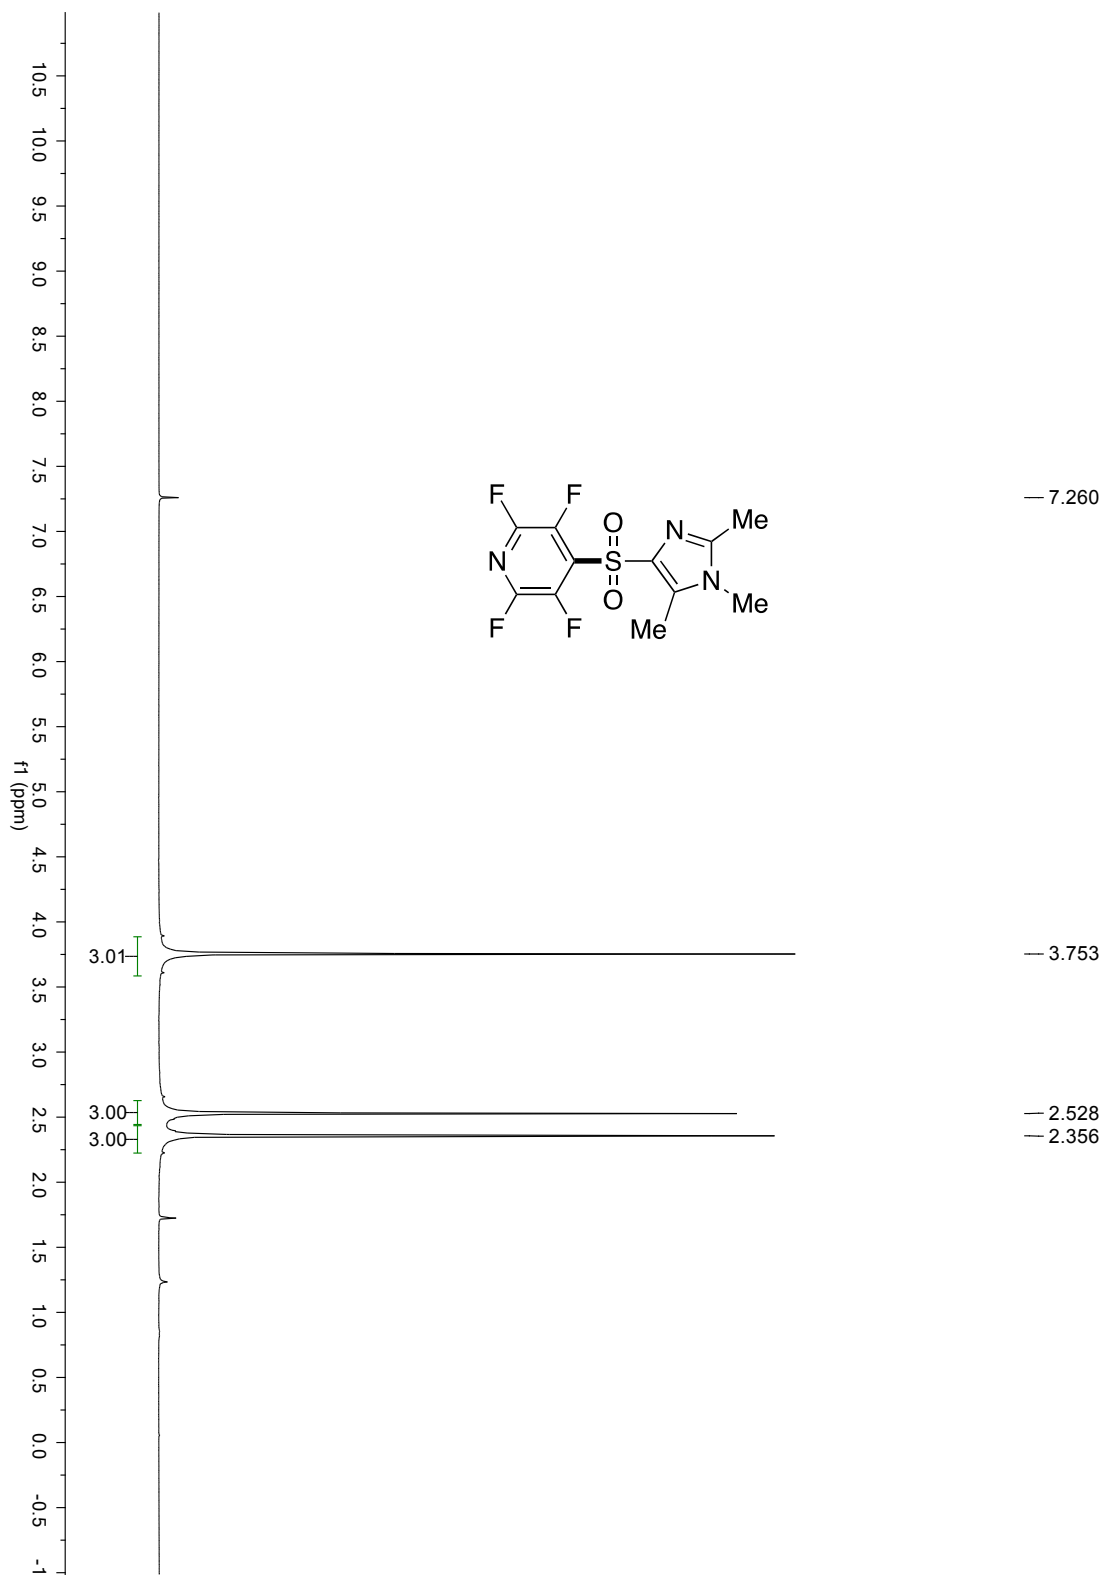

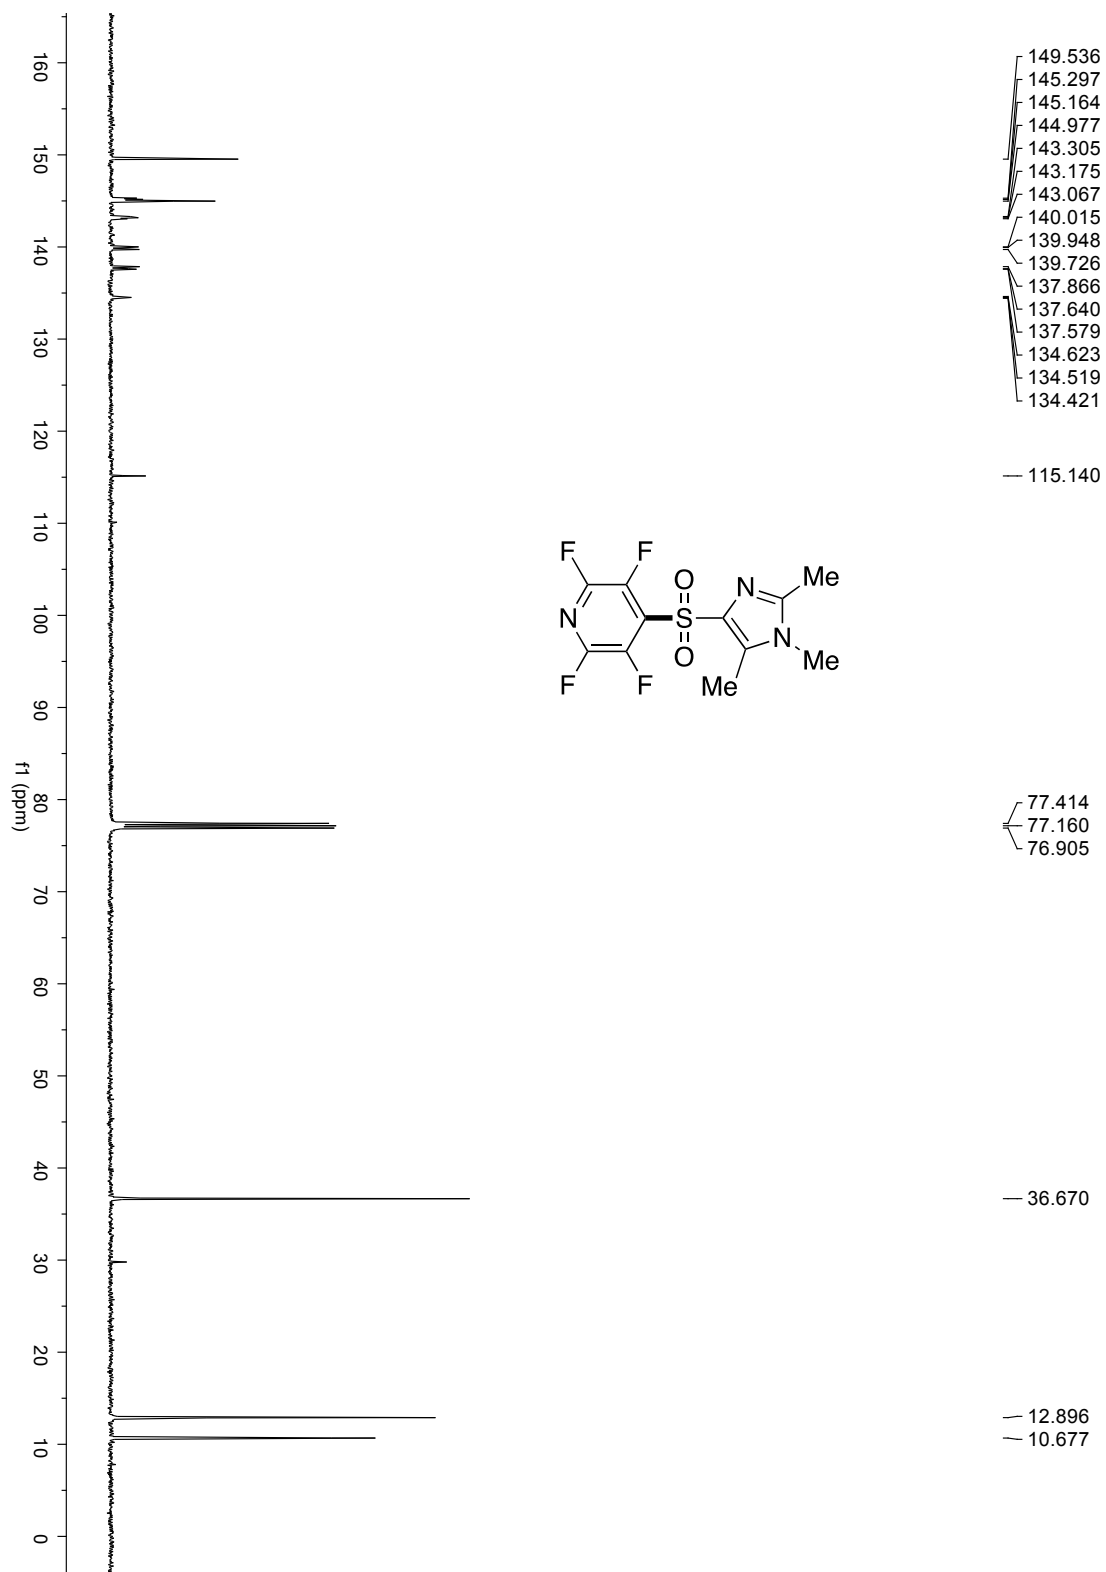

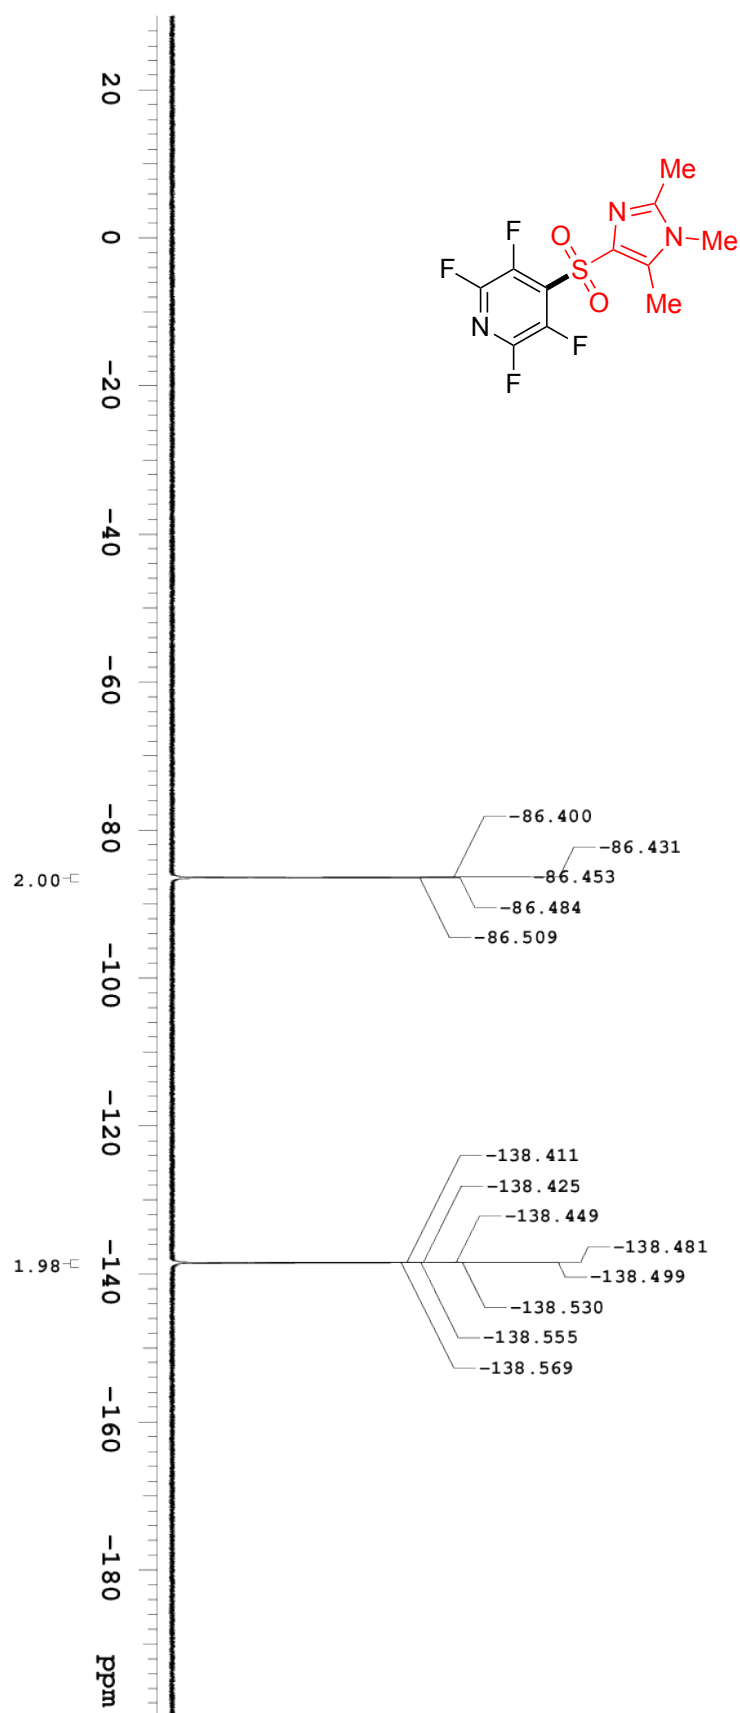

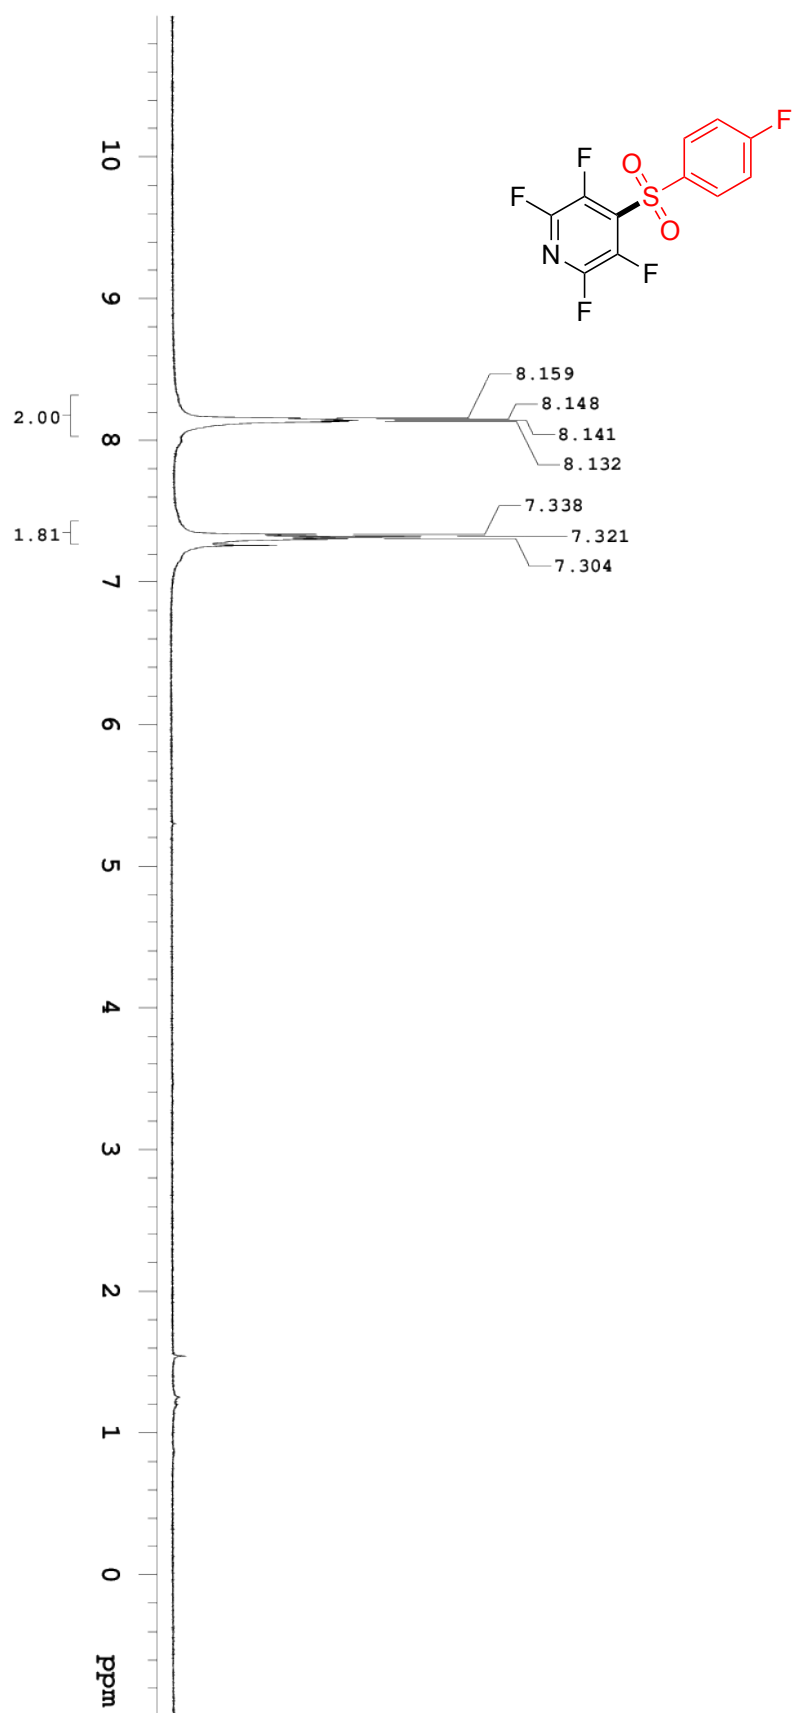

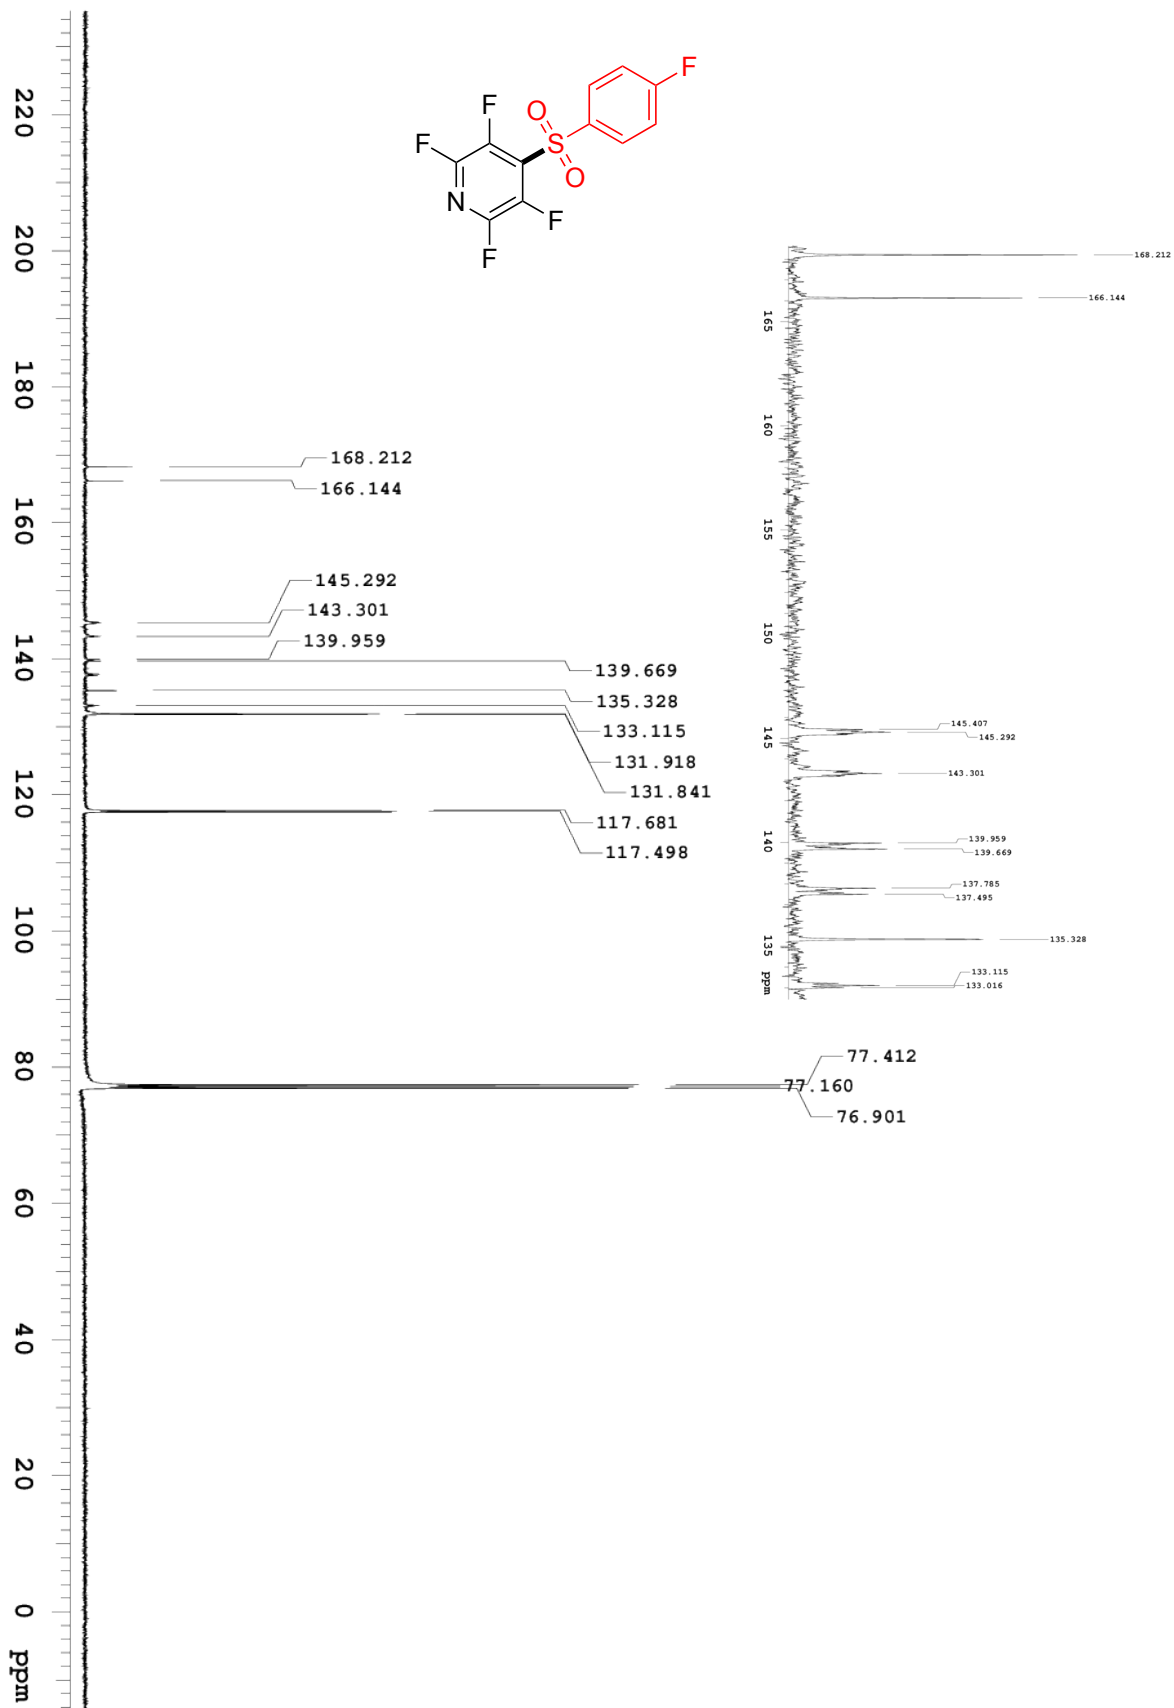

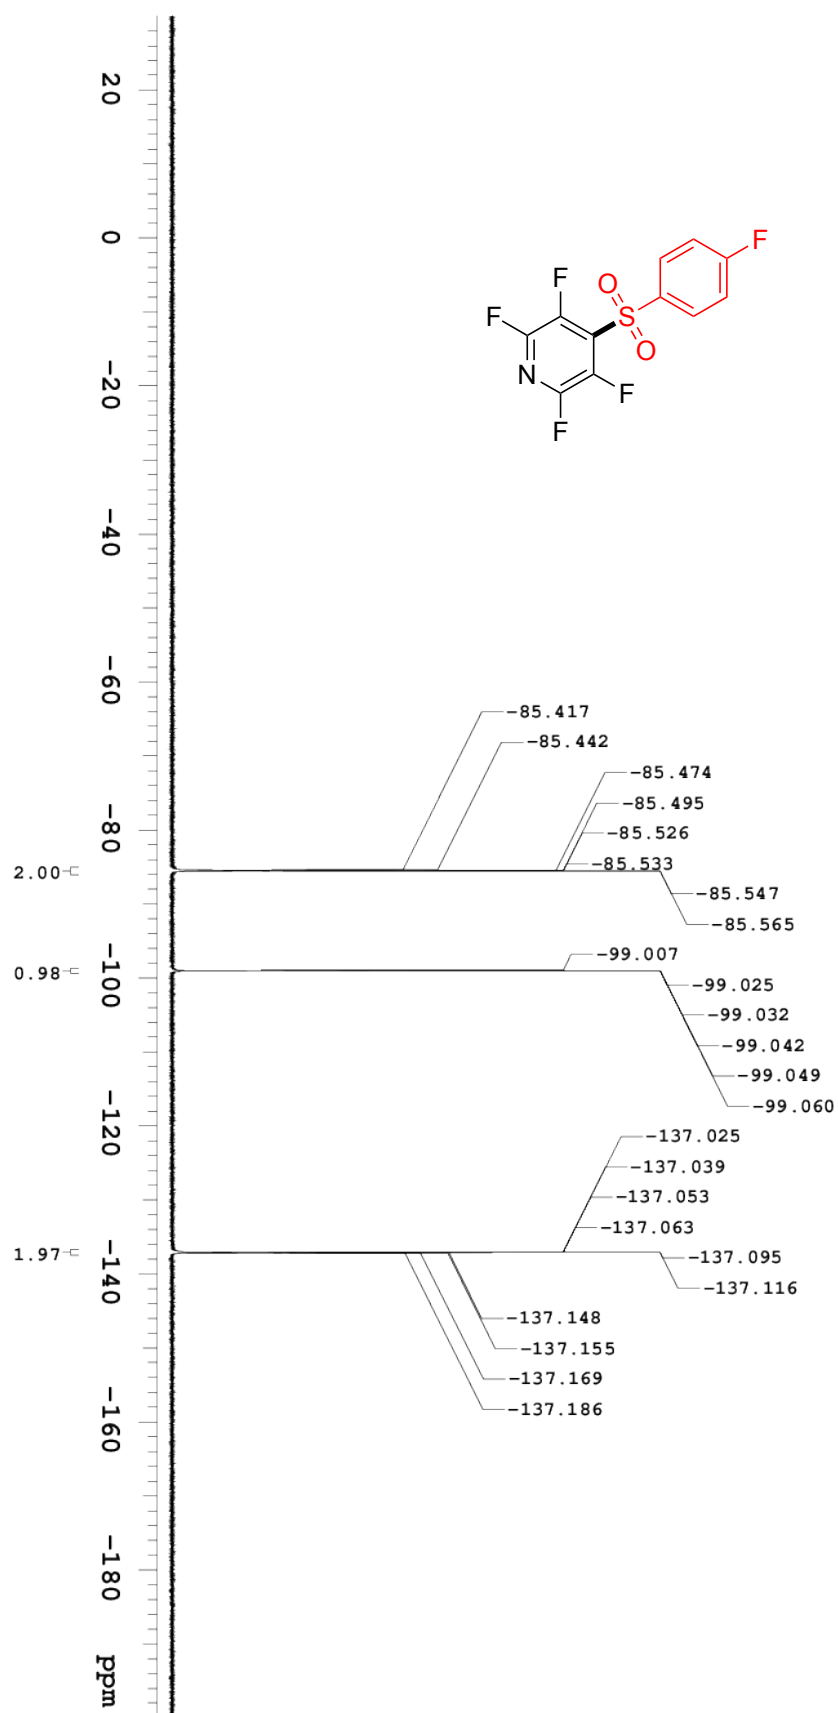

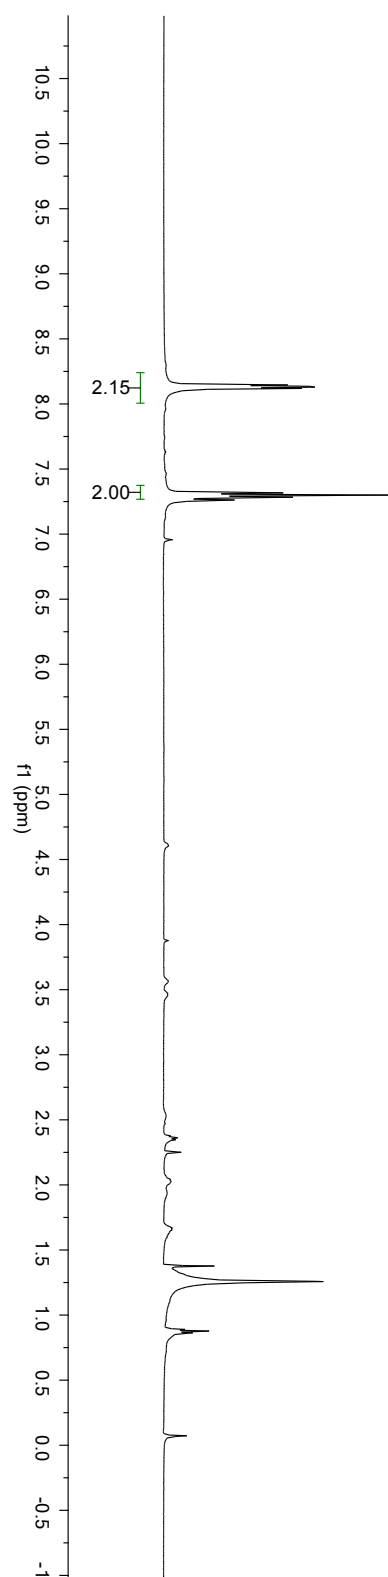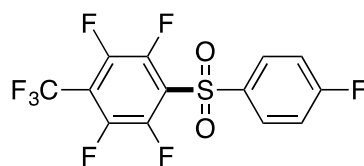

8.146  
8.135  
8.129  
8.119  
7.317  
7.300  
7.284  
7.262



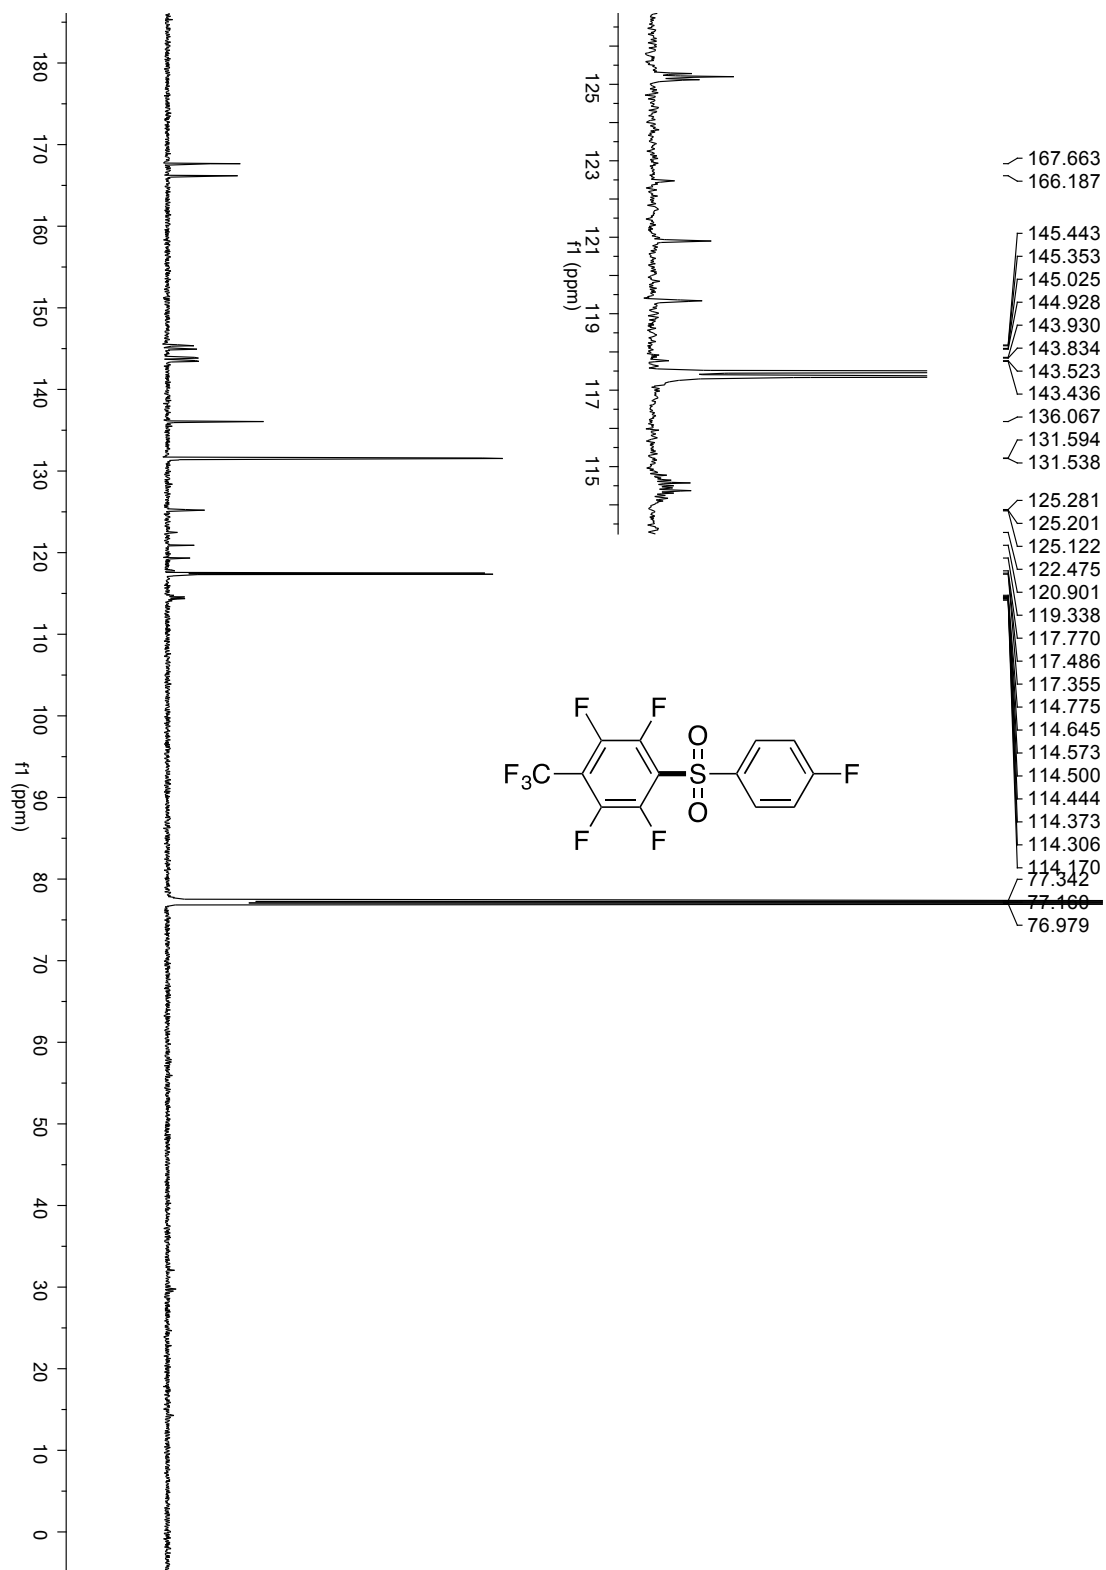

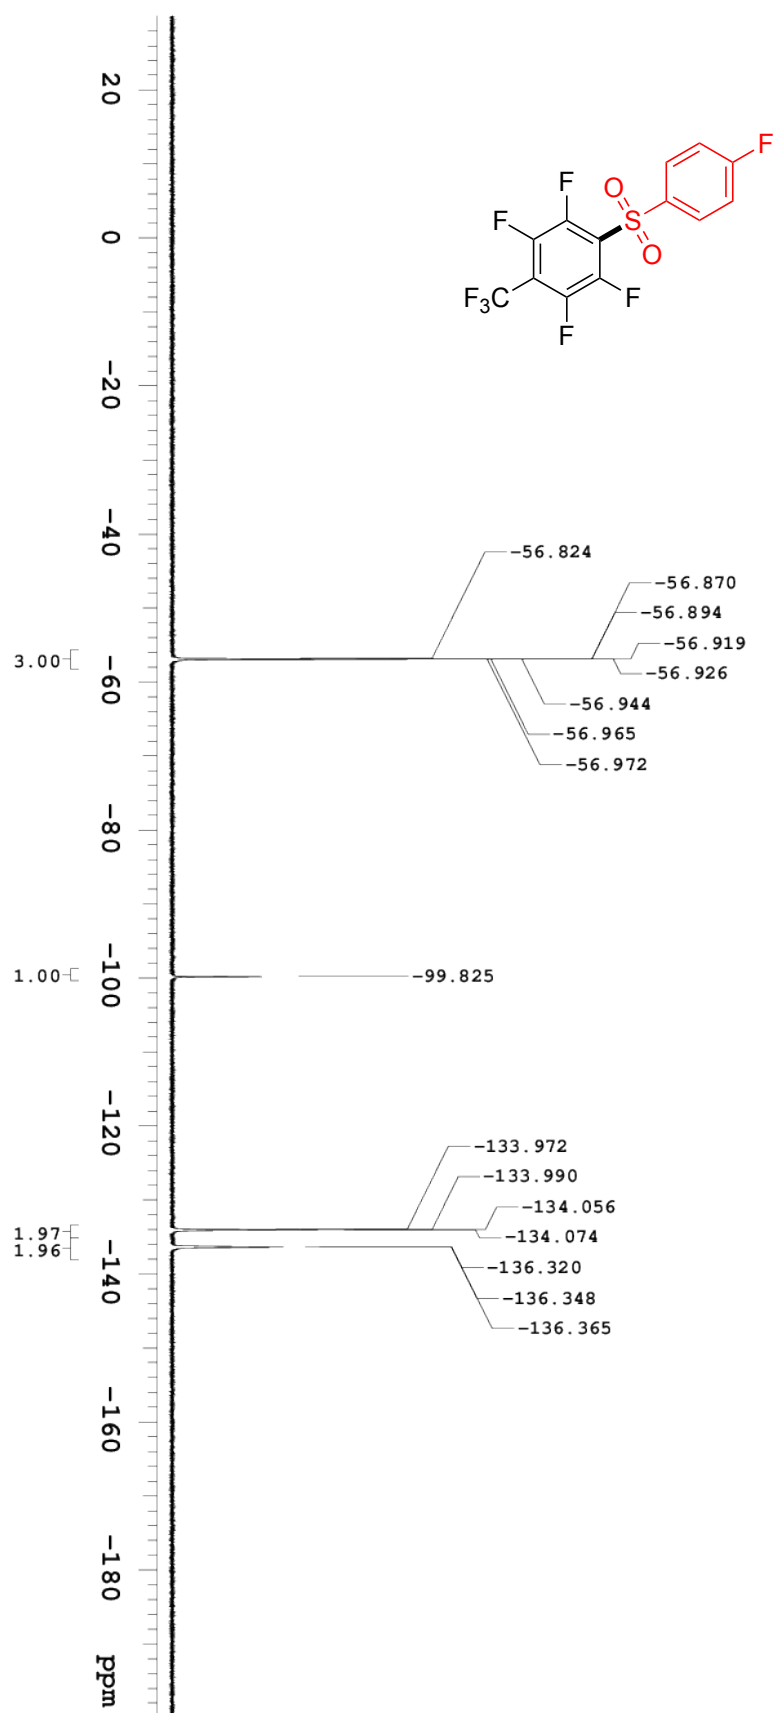

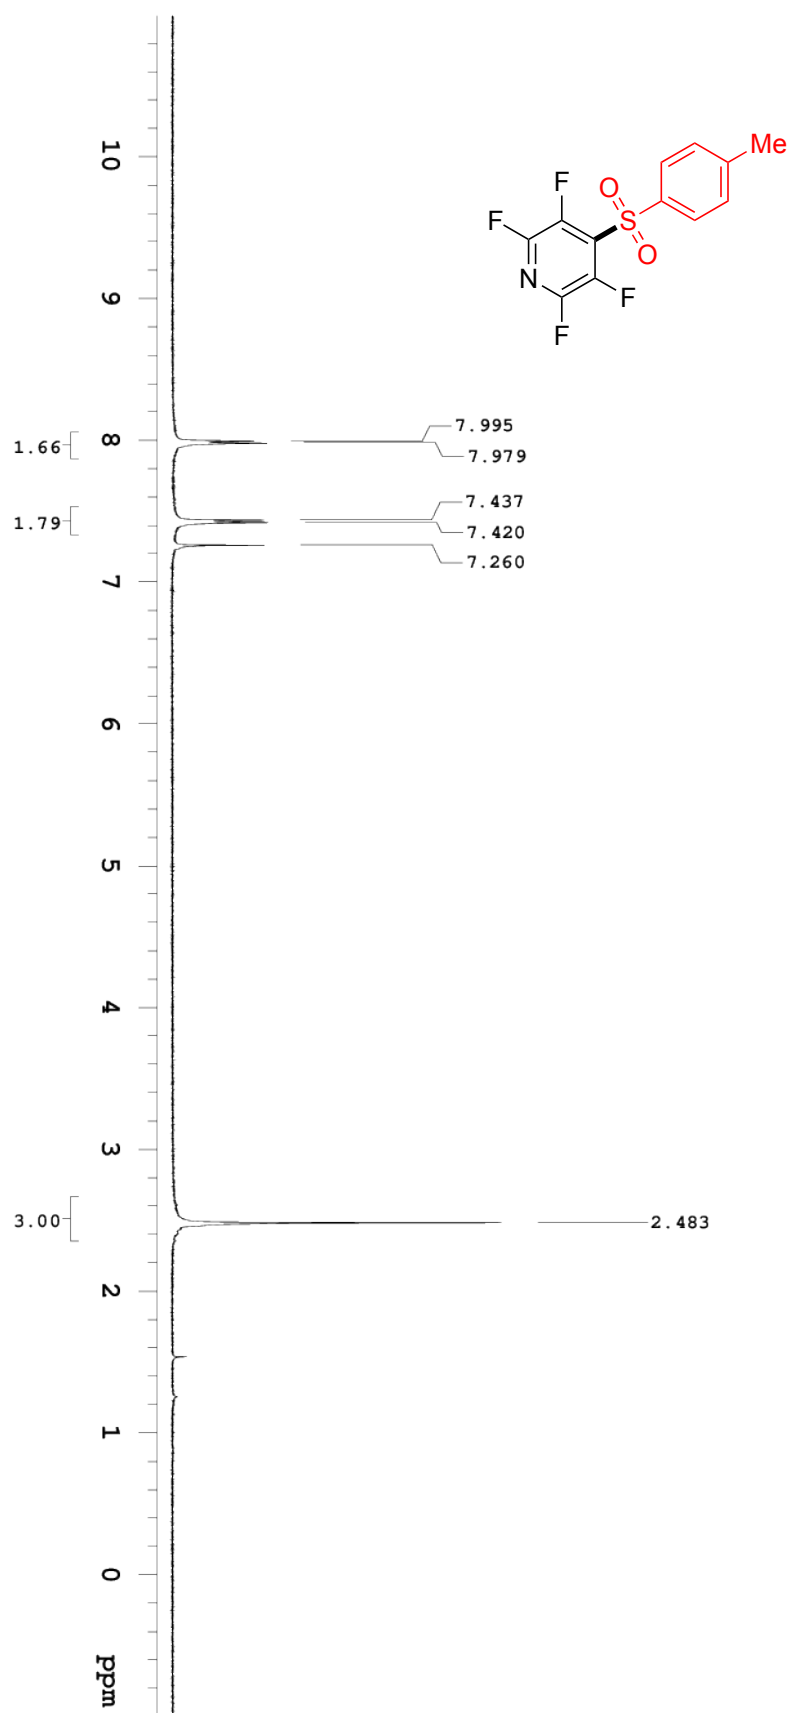

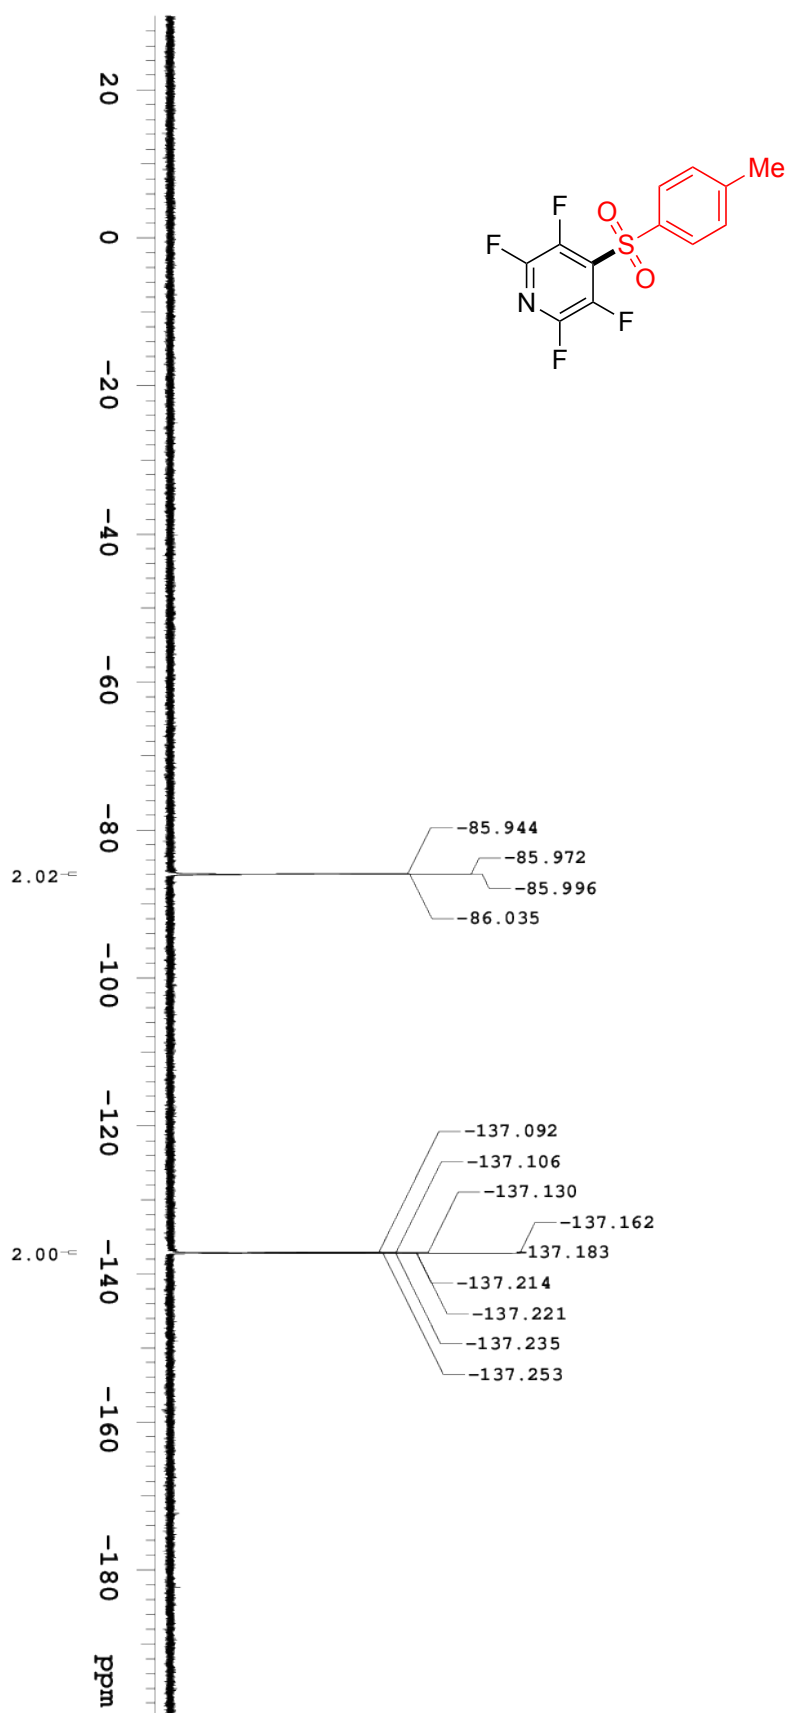

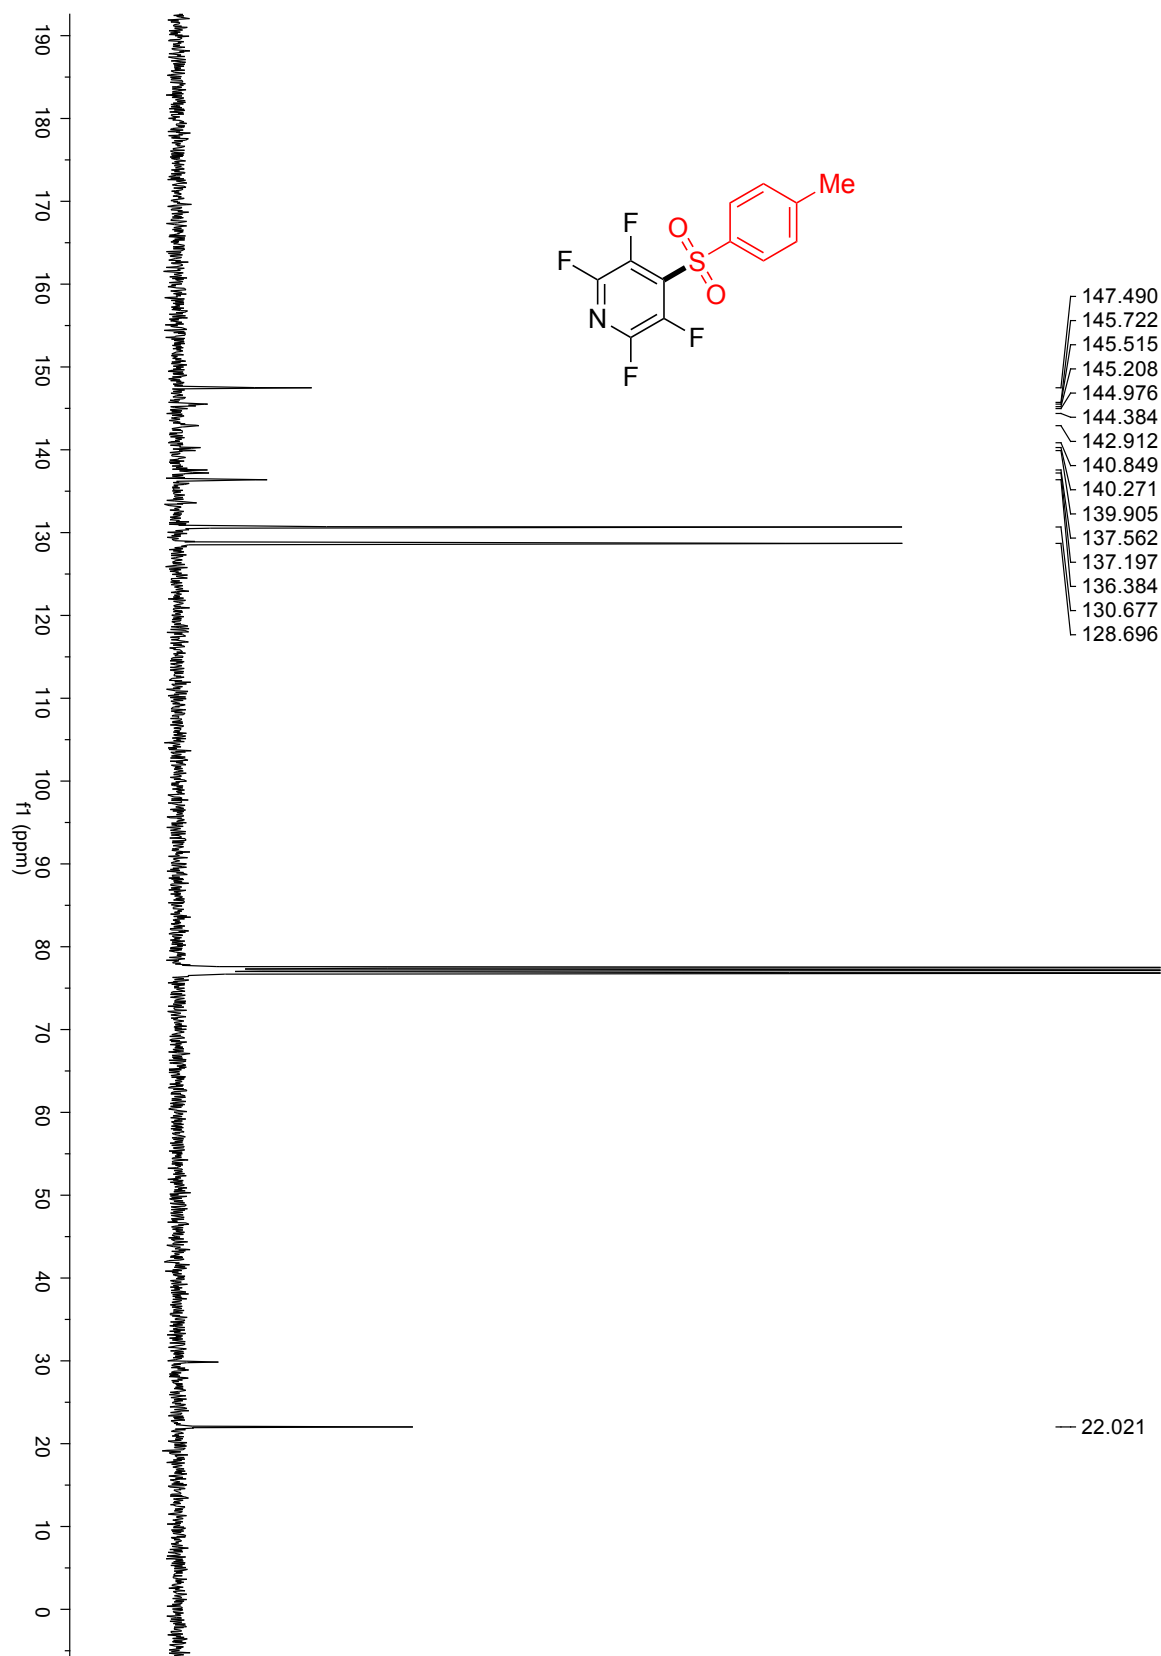

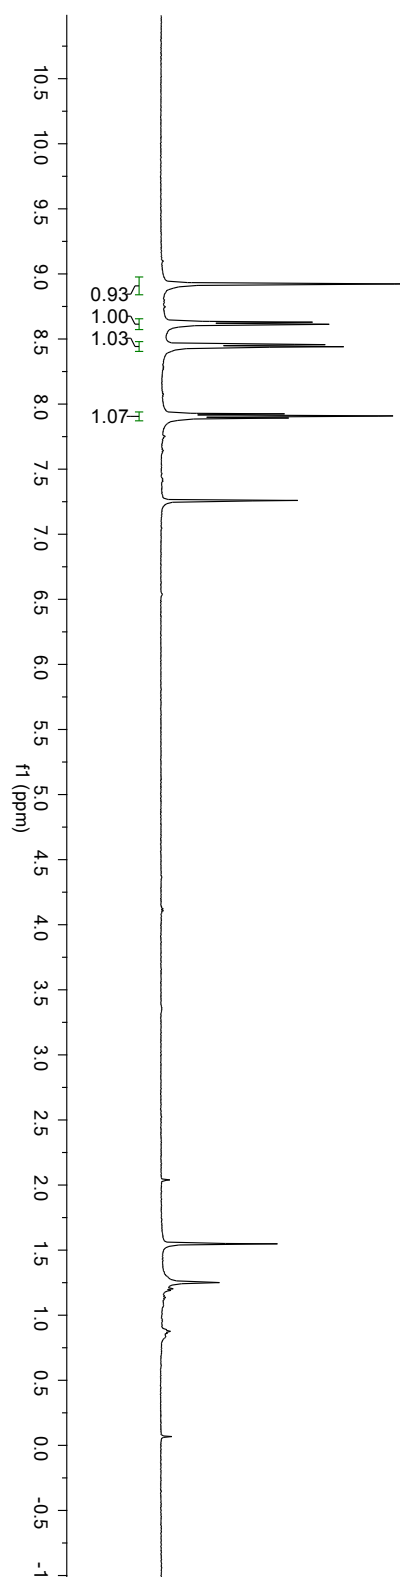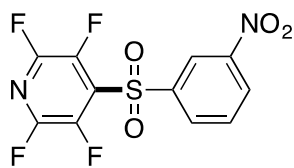

8.923  
 8.629  
 8.613  
 8.457  
 8.441  
 7.925  
 7.909  
 7.893  
 7.260  
 7.257

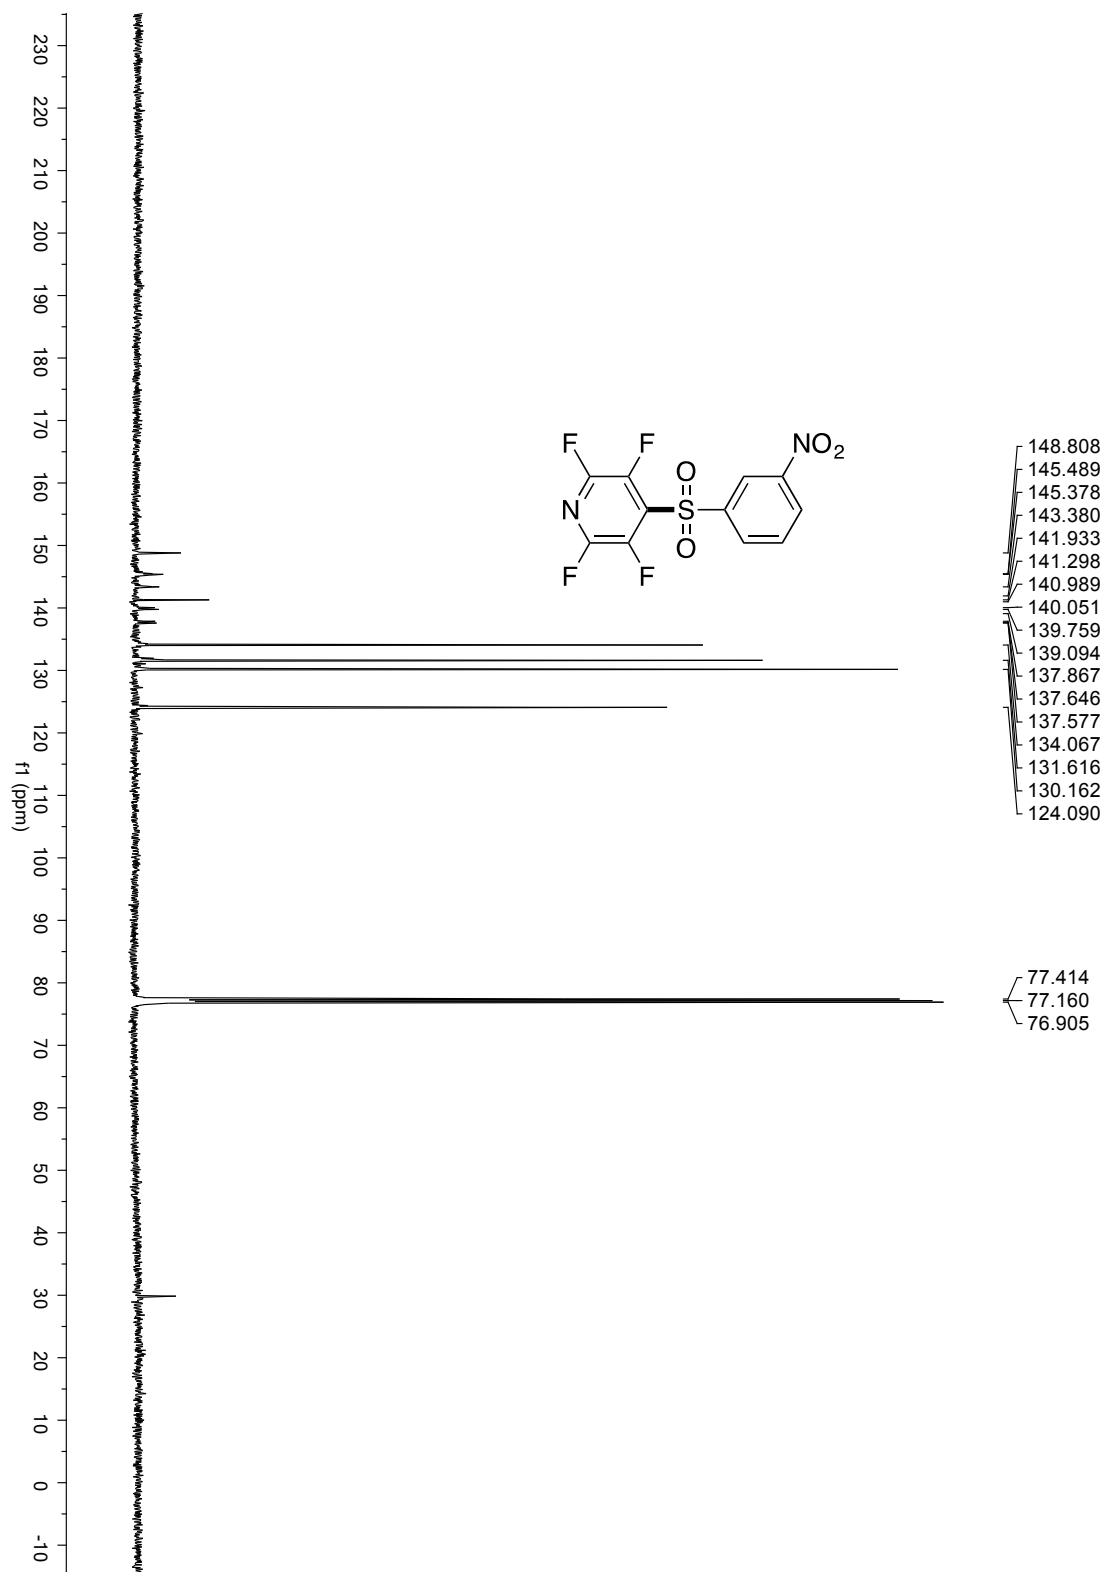

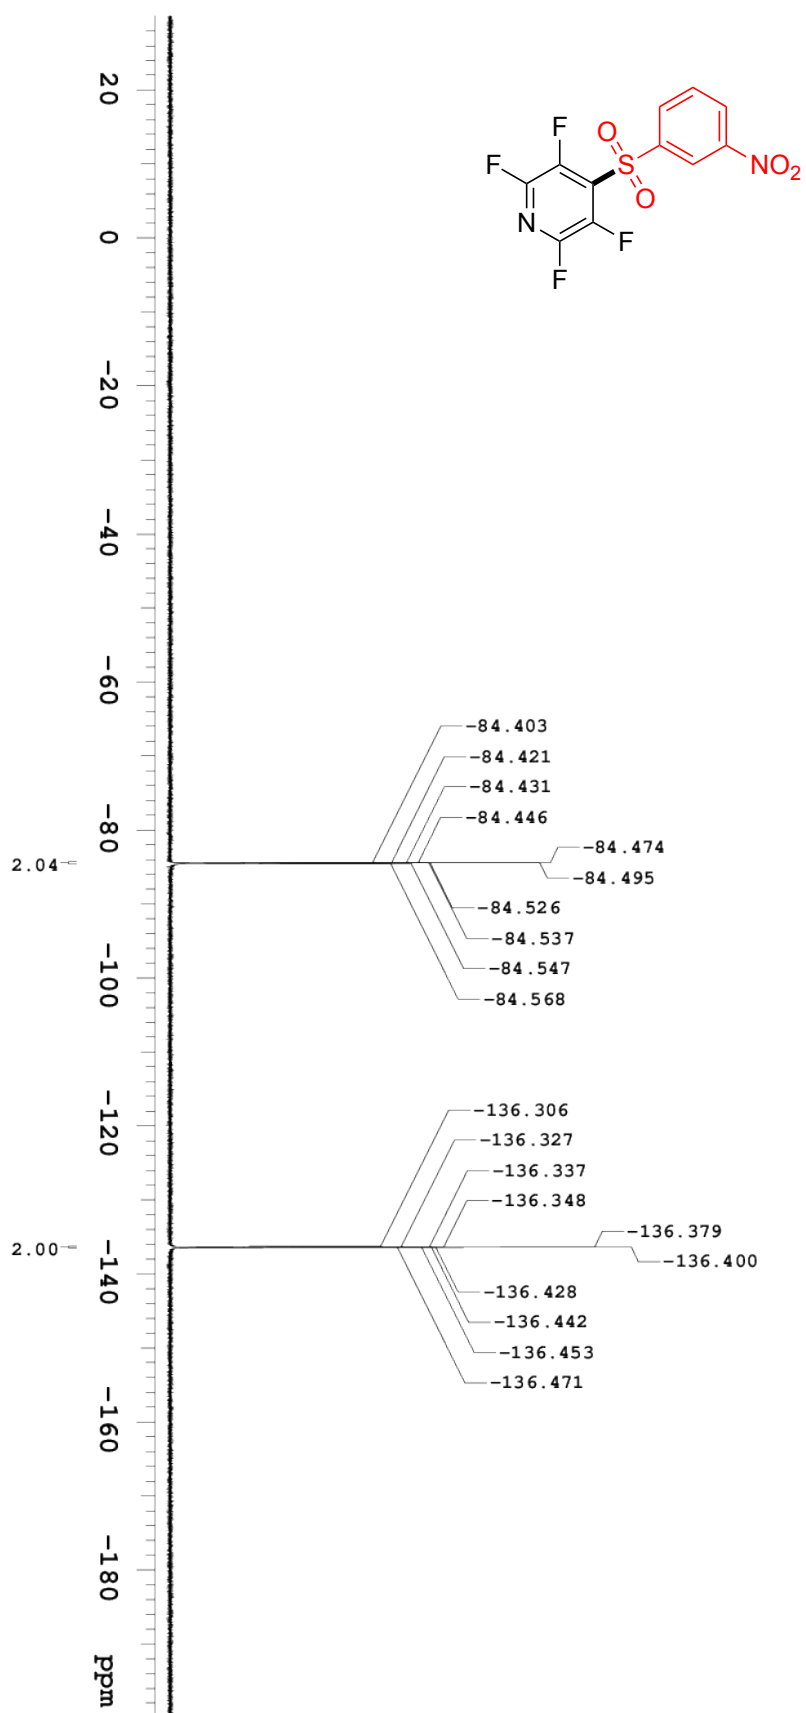



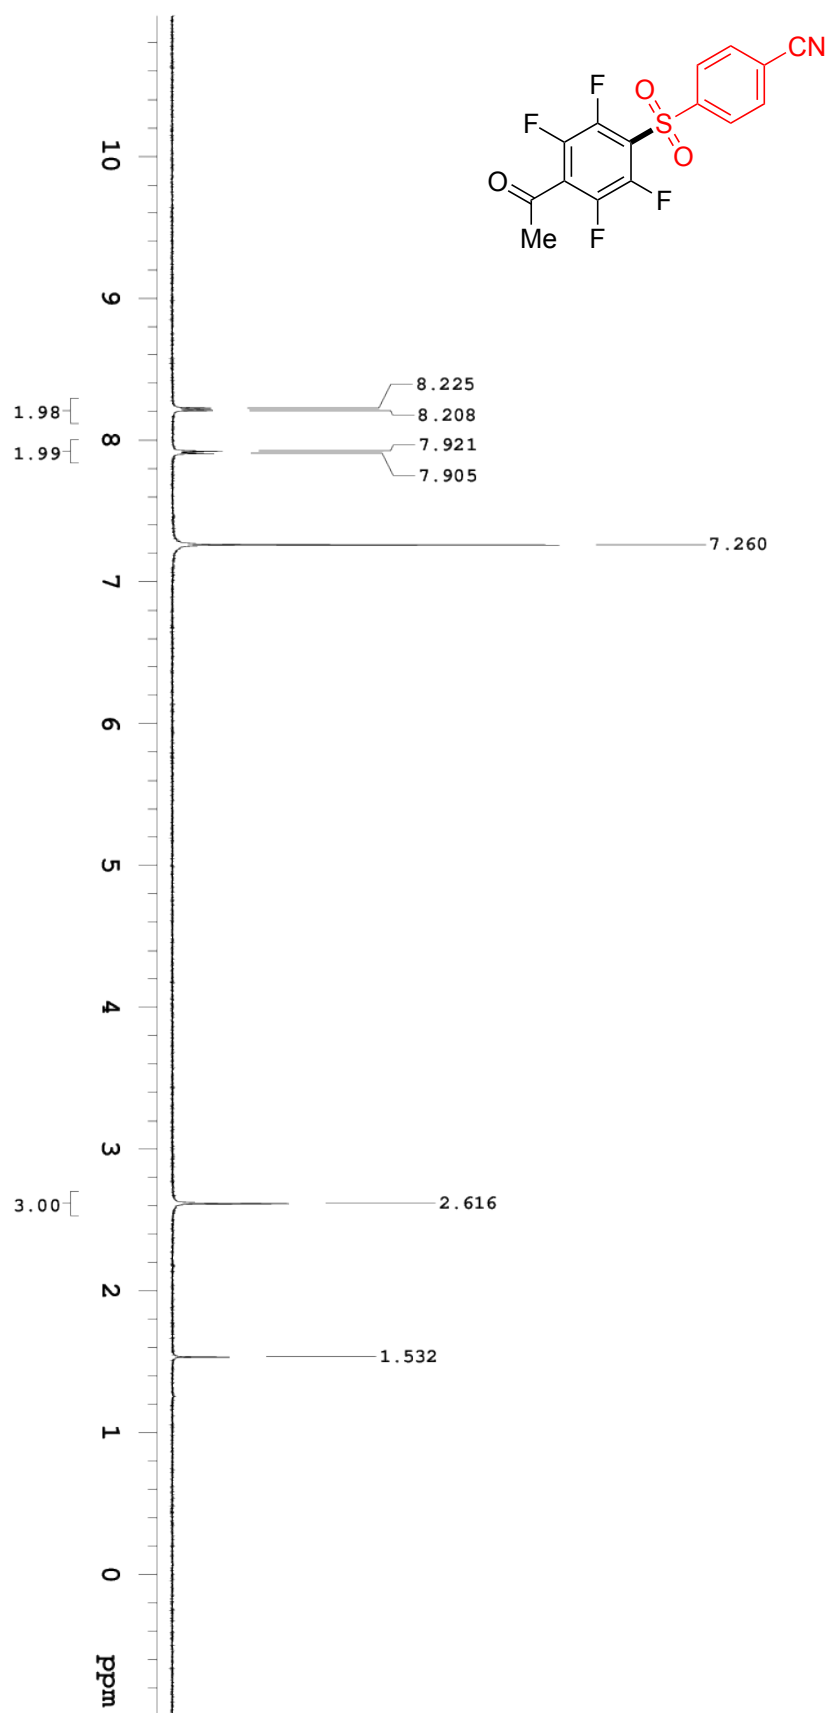

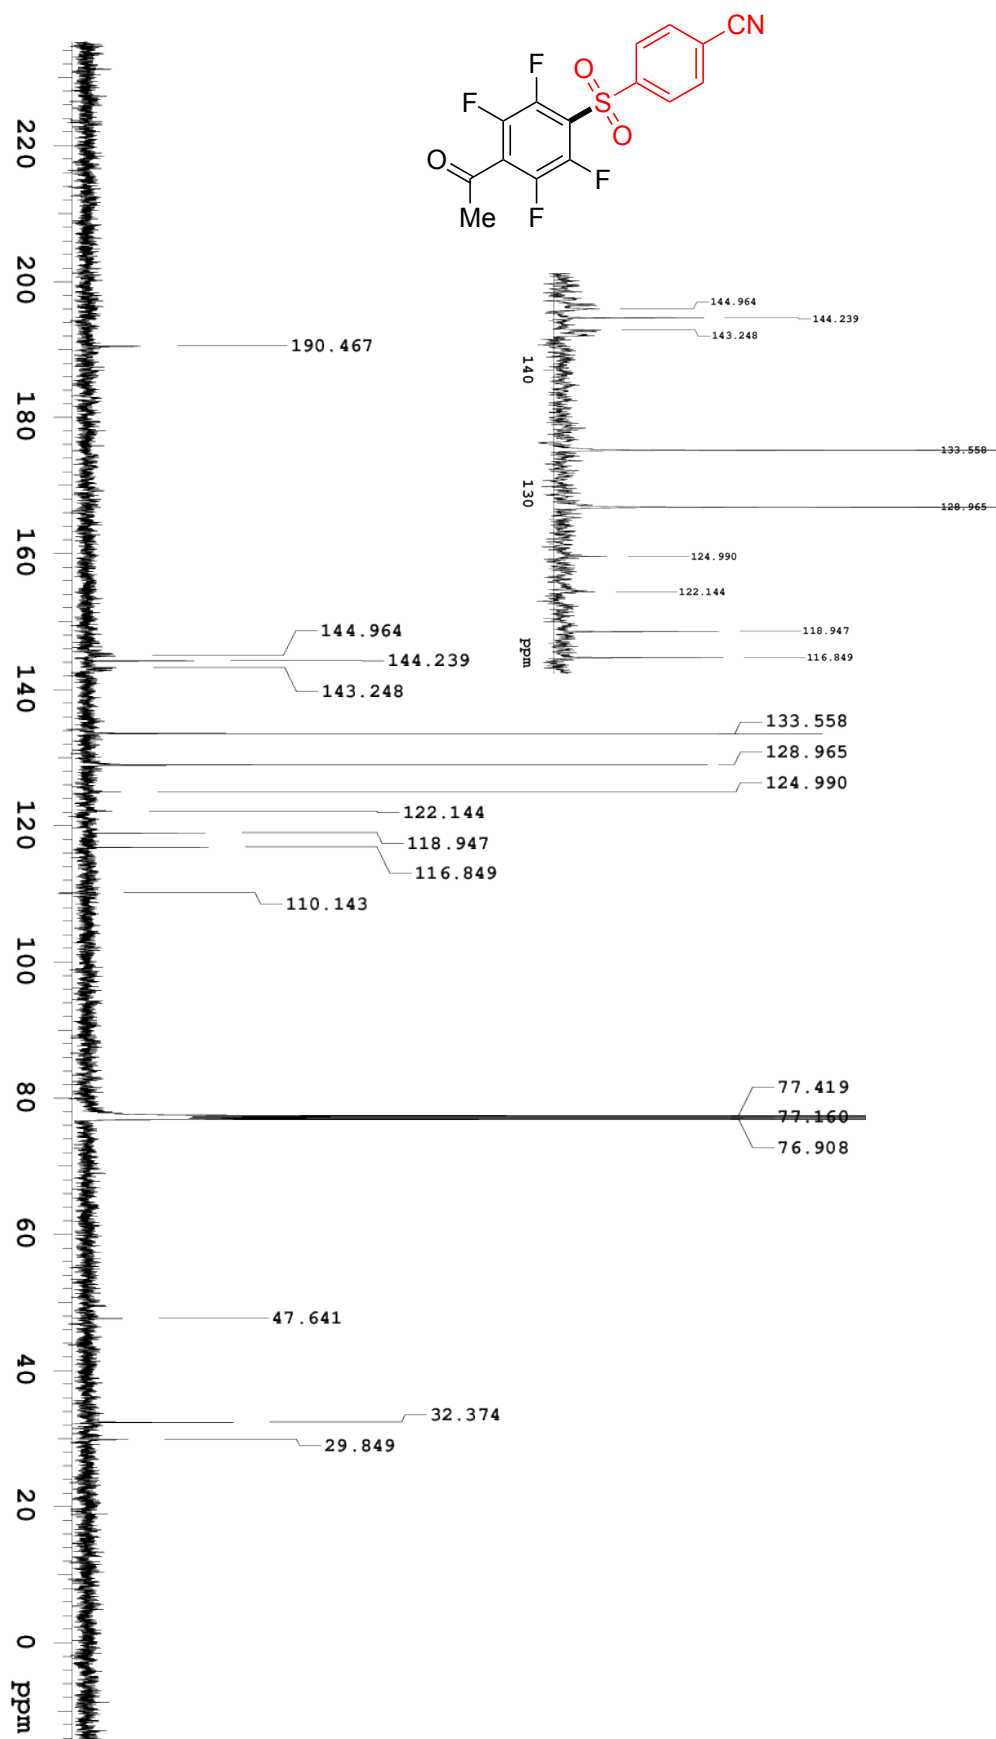

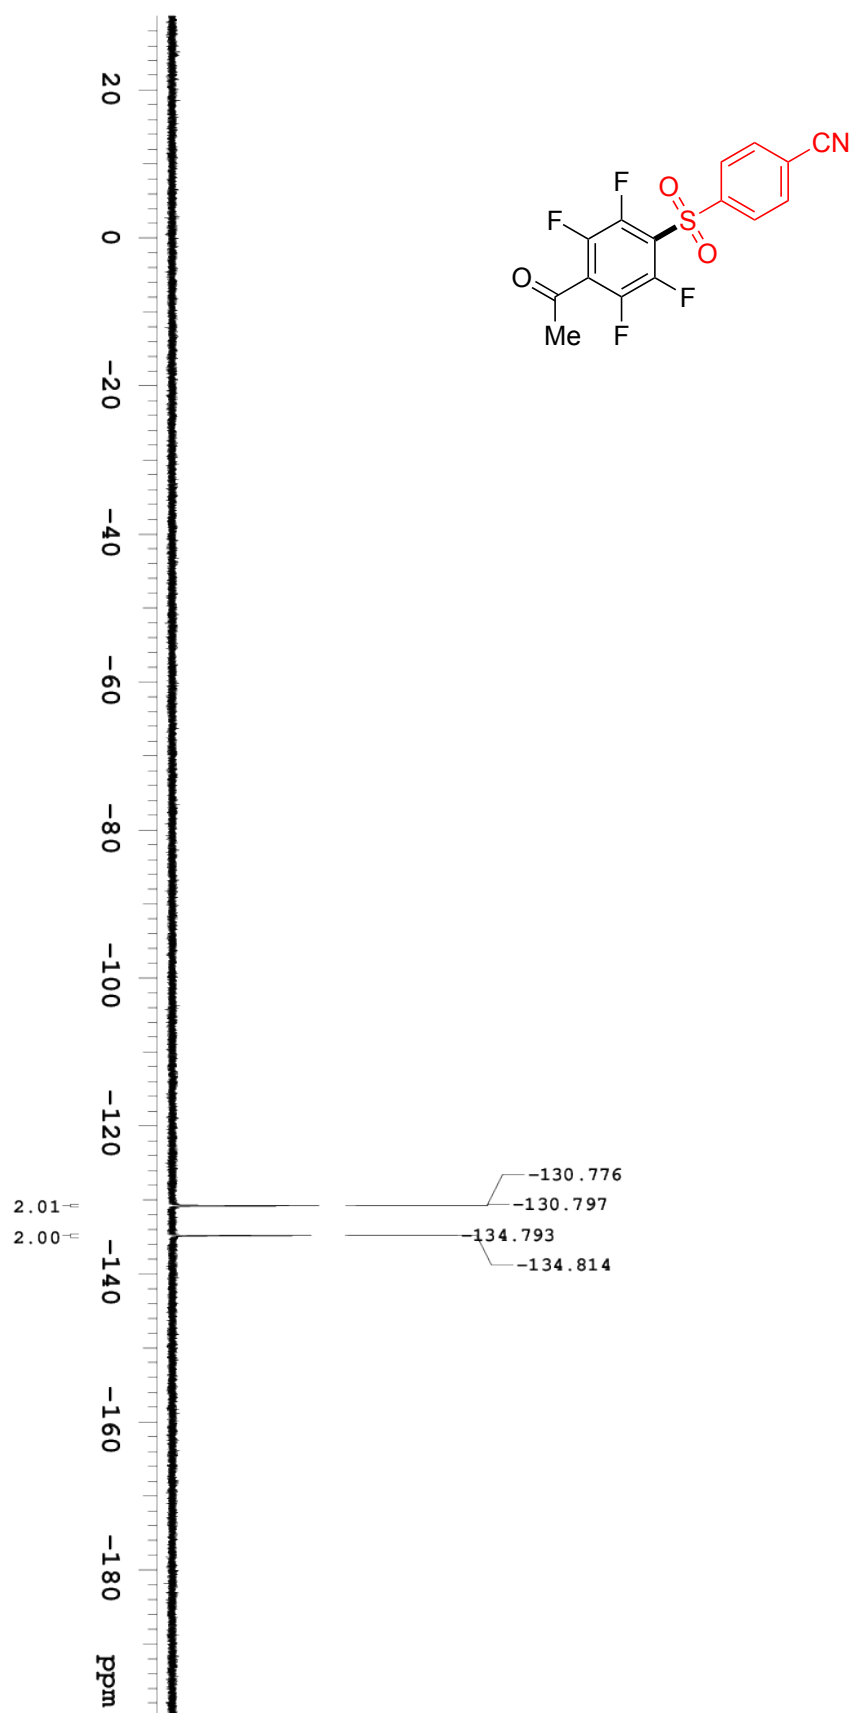

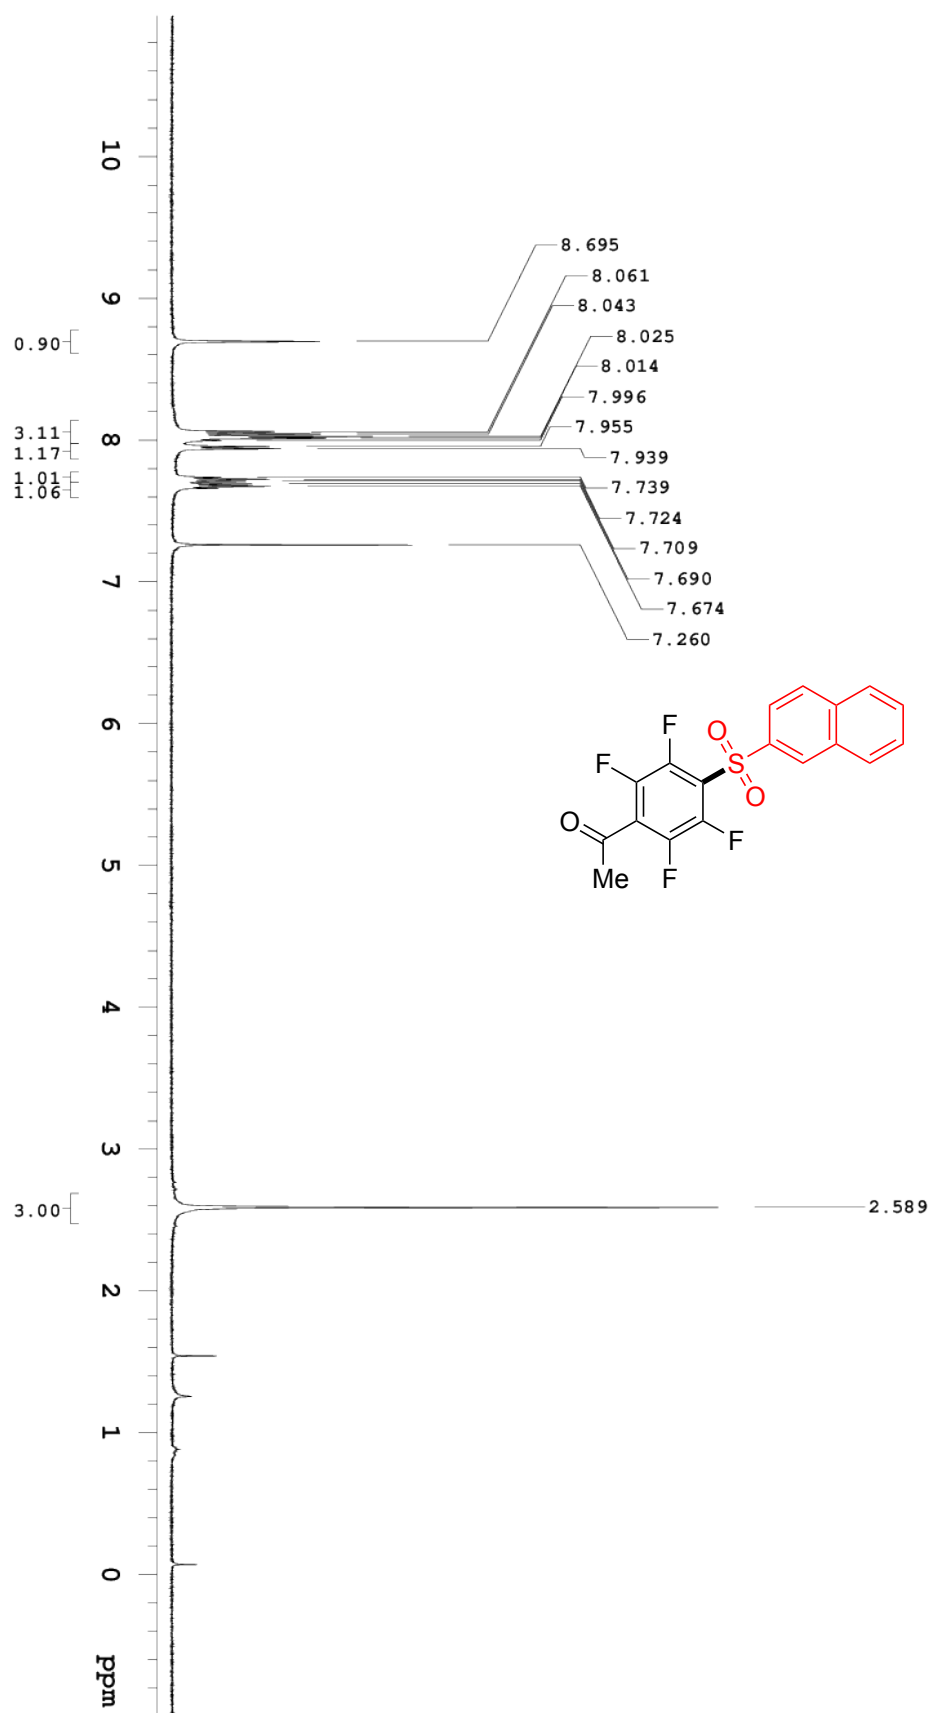

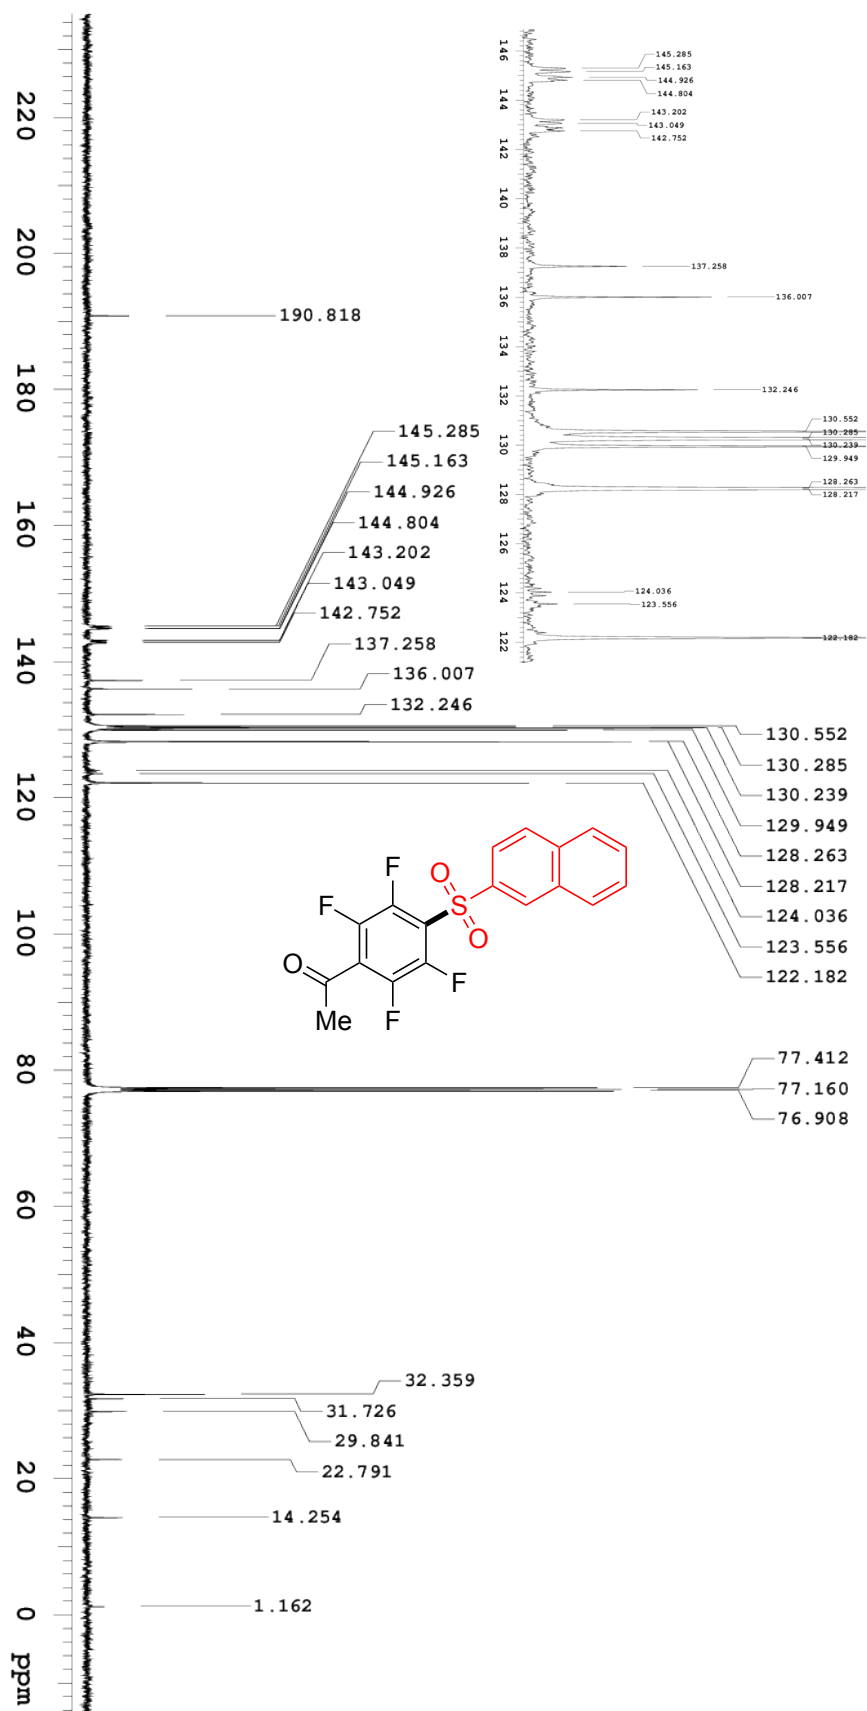

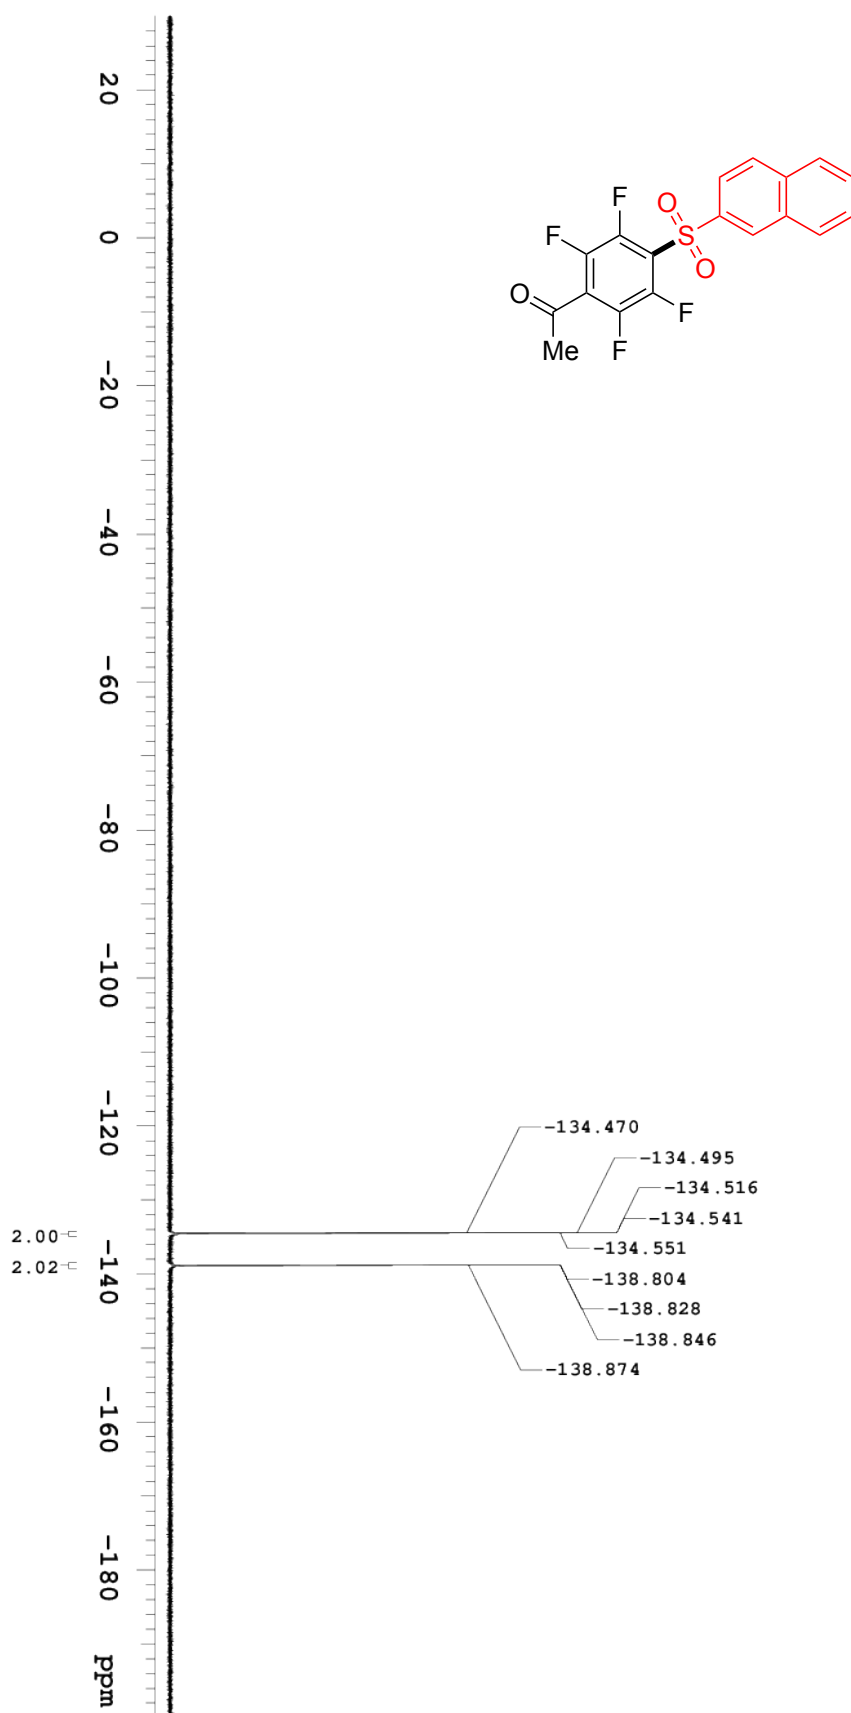

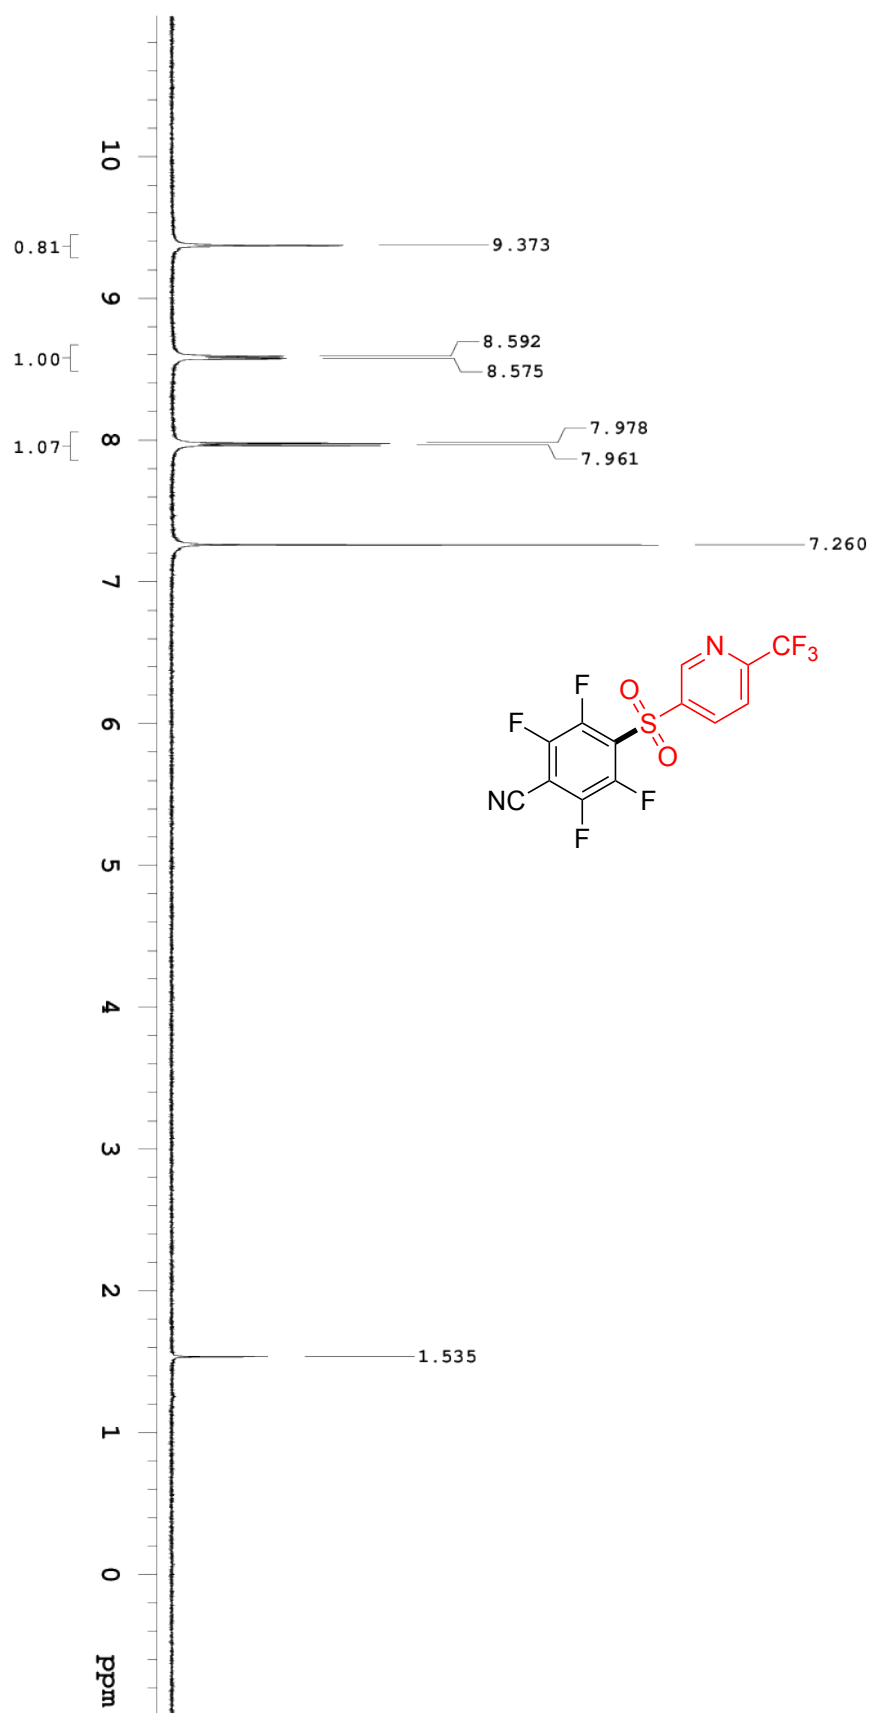

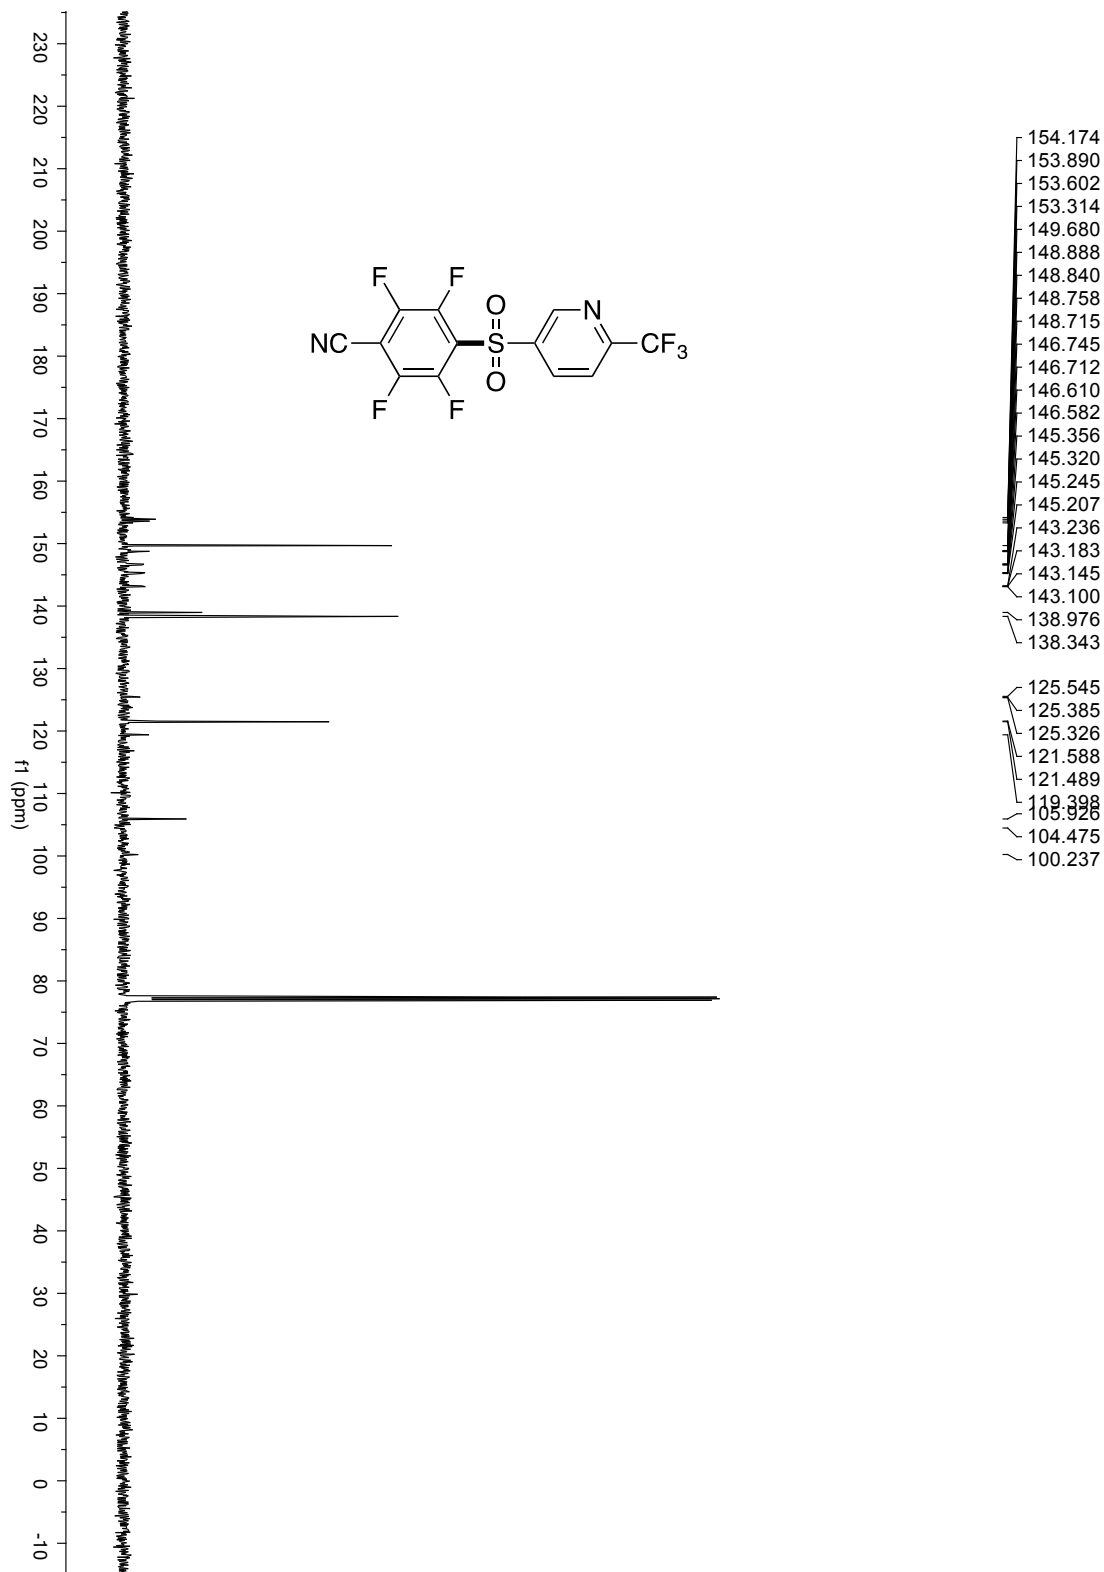



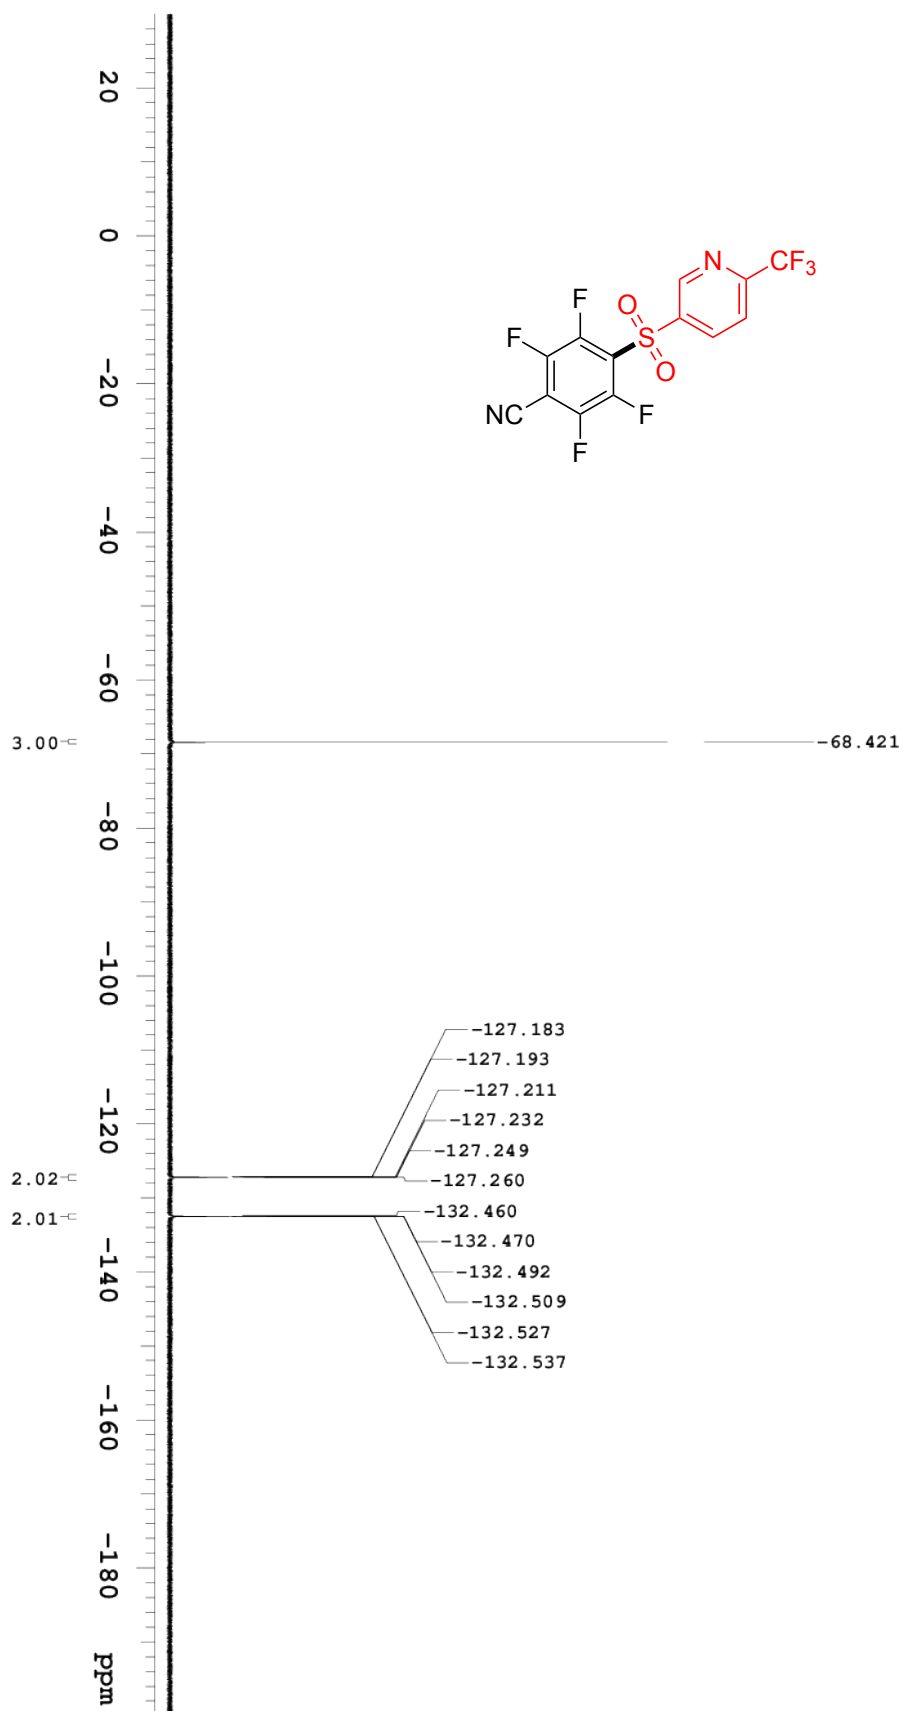

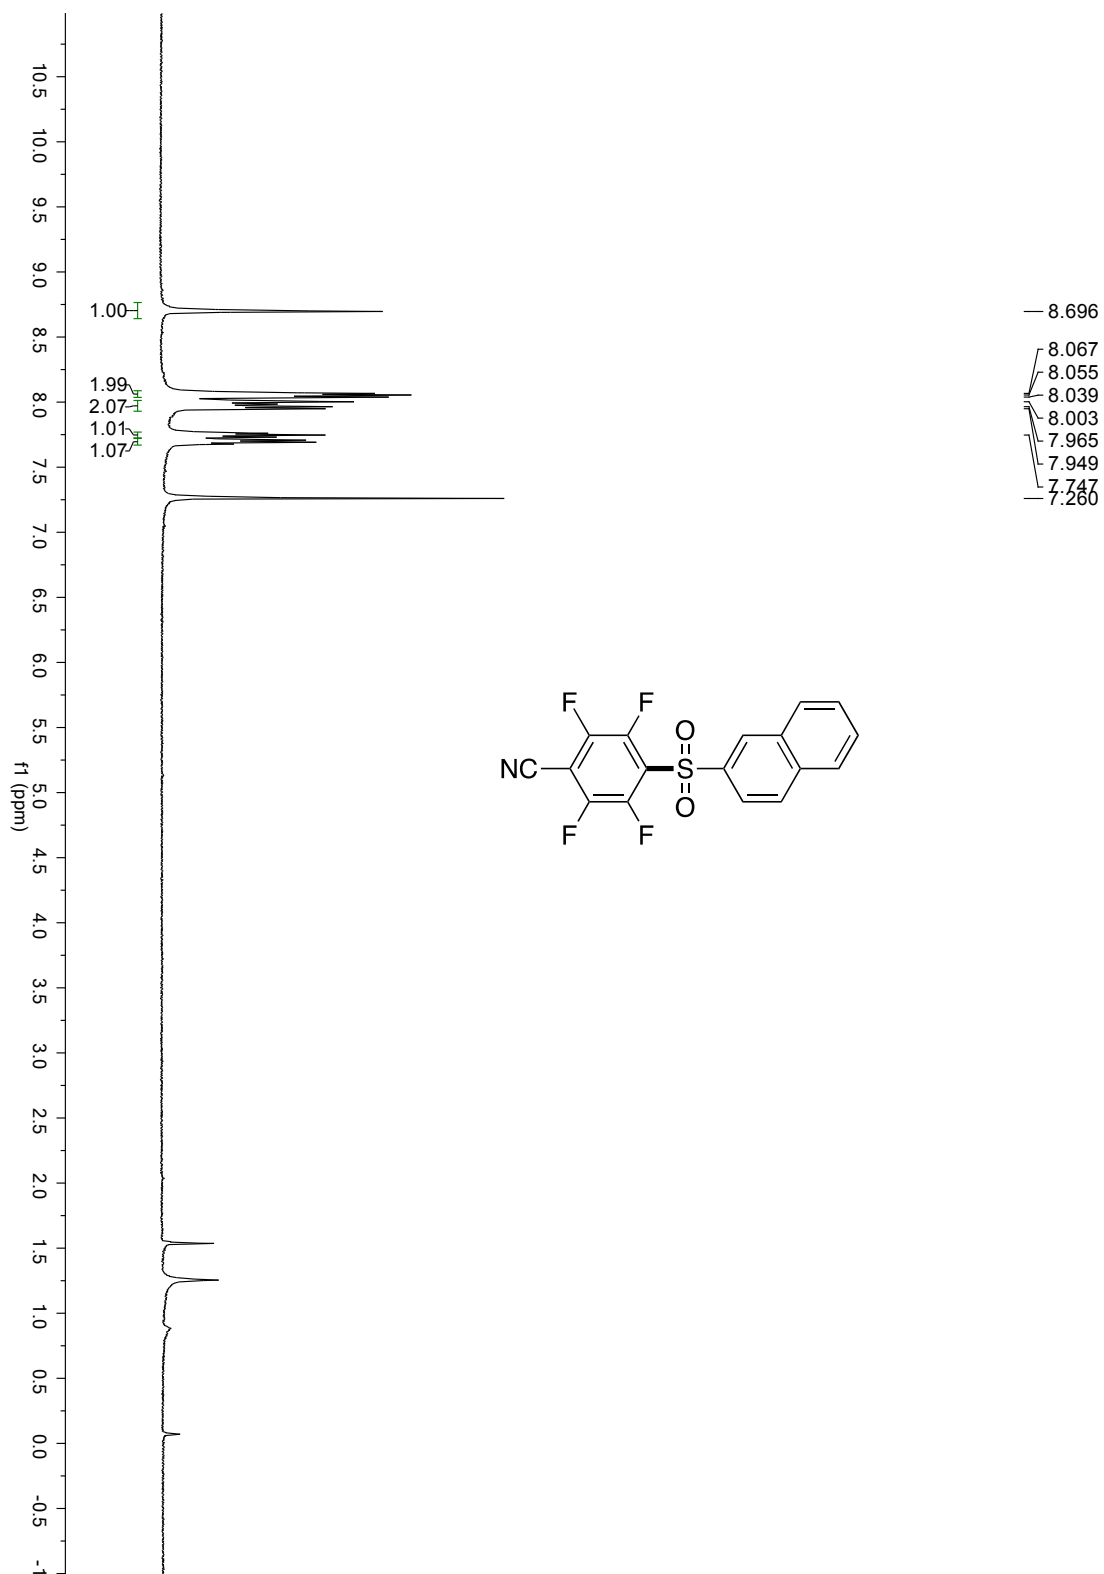

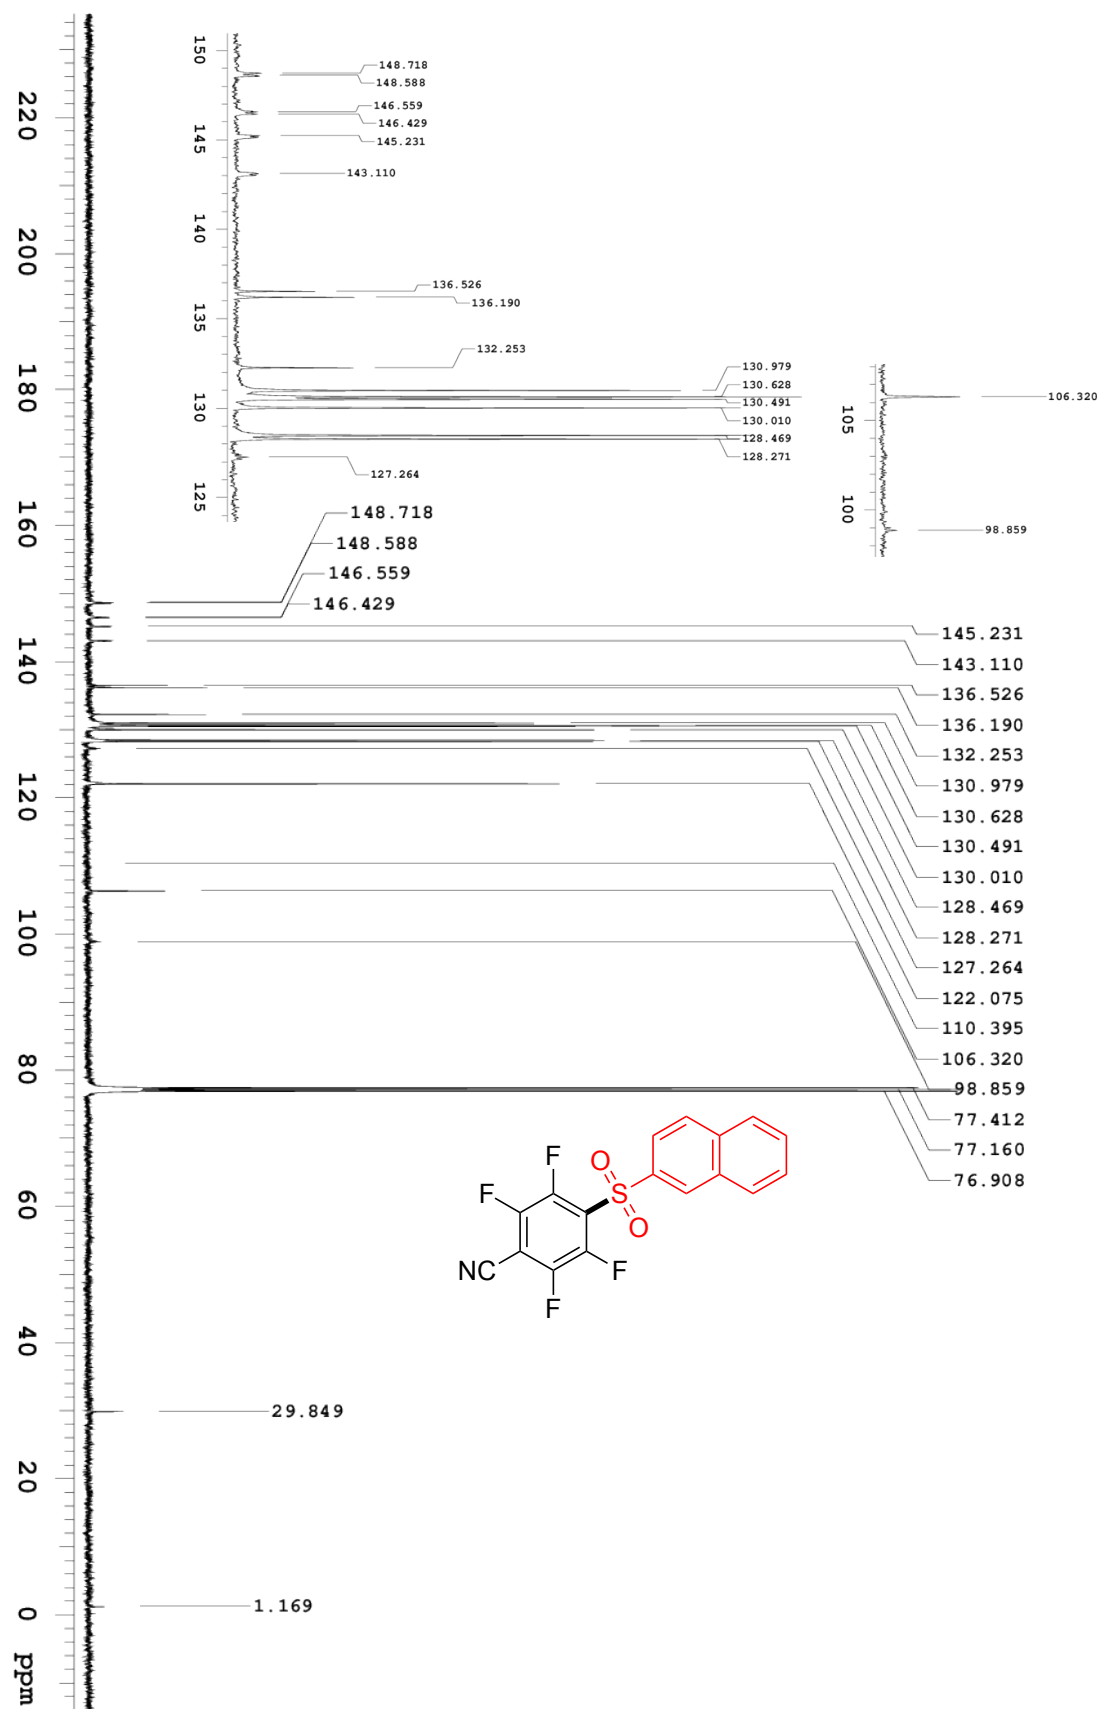

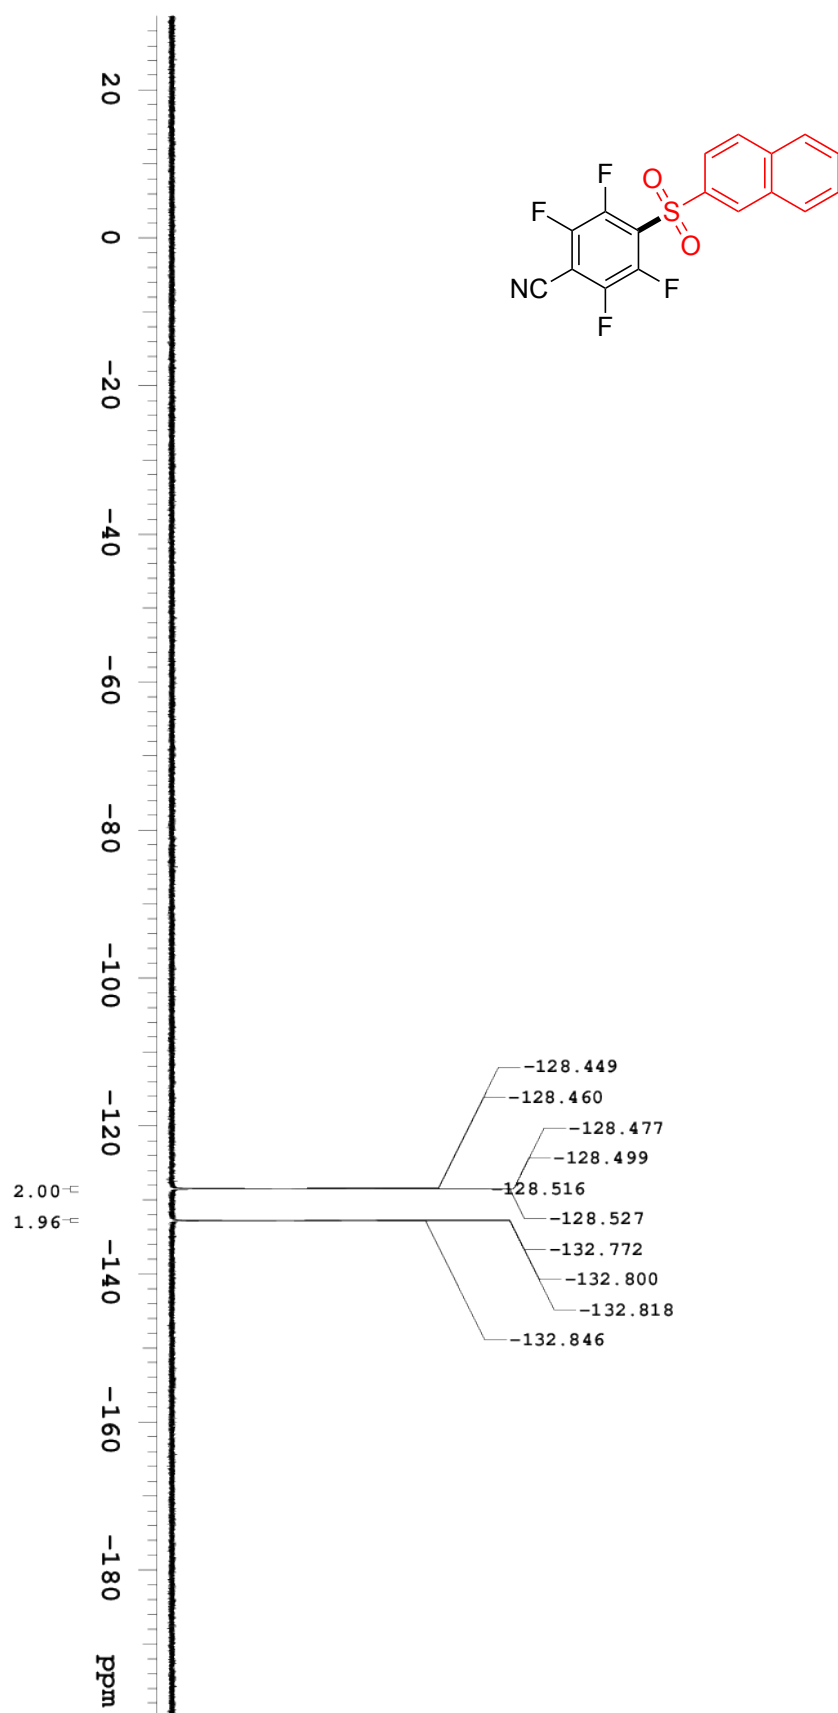

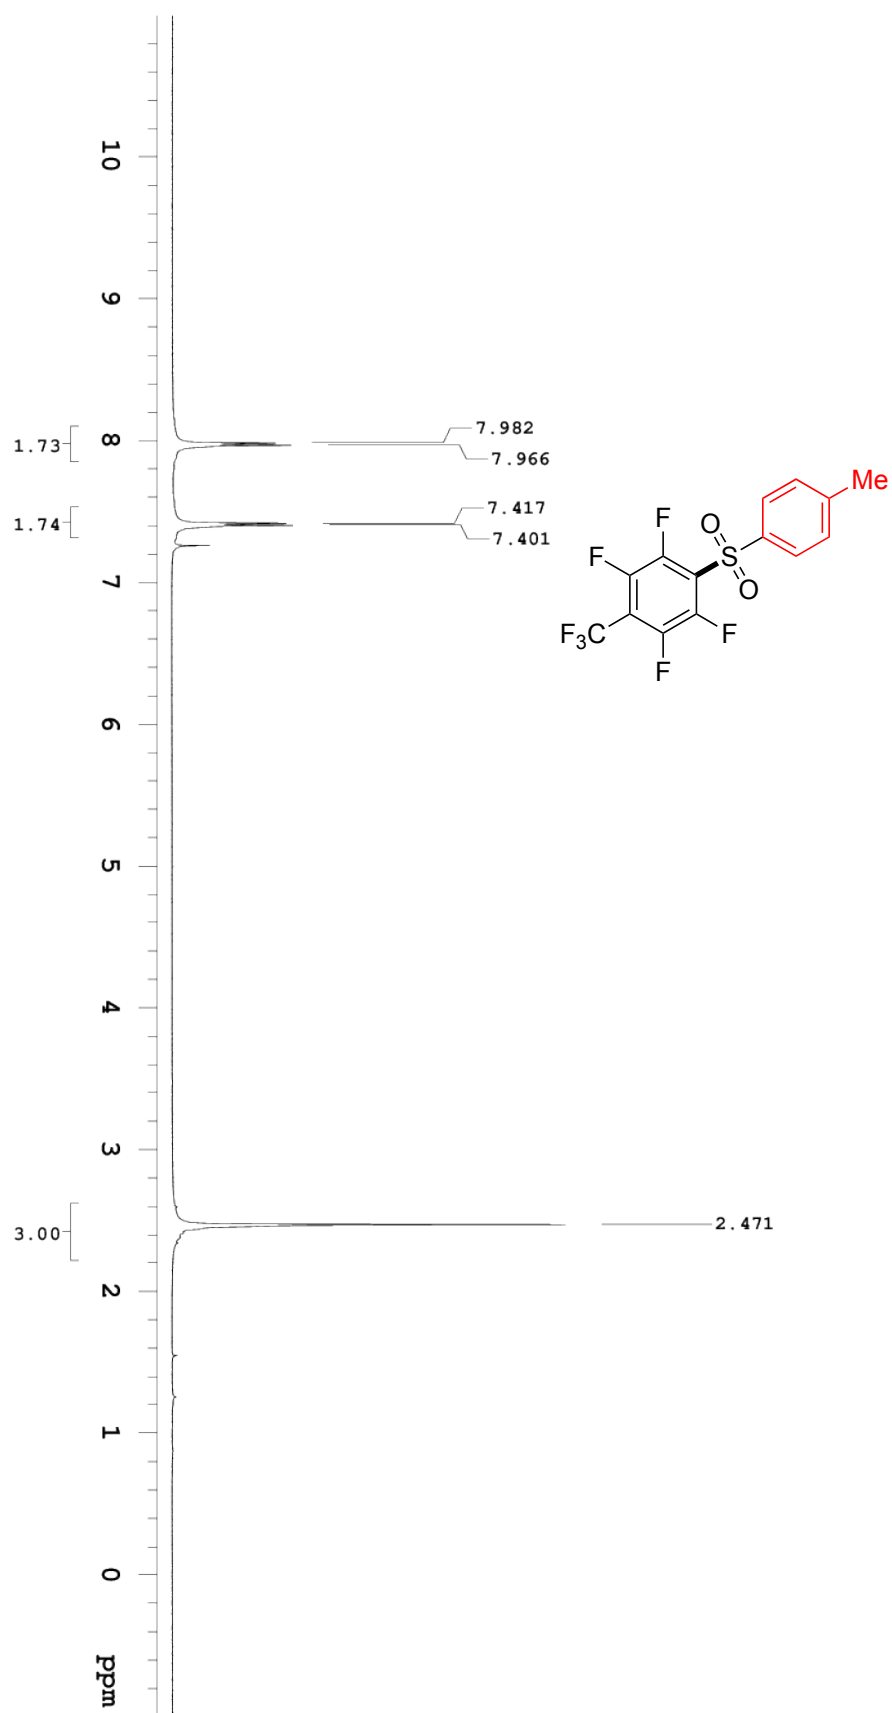

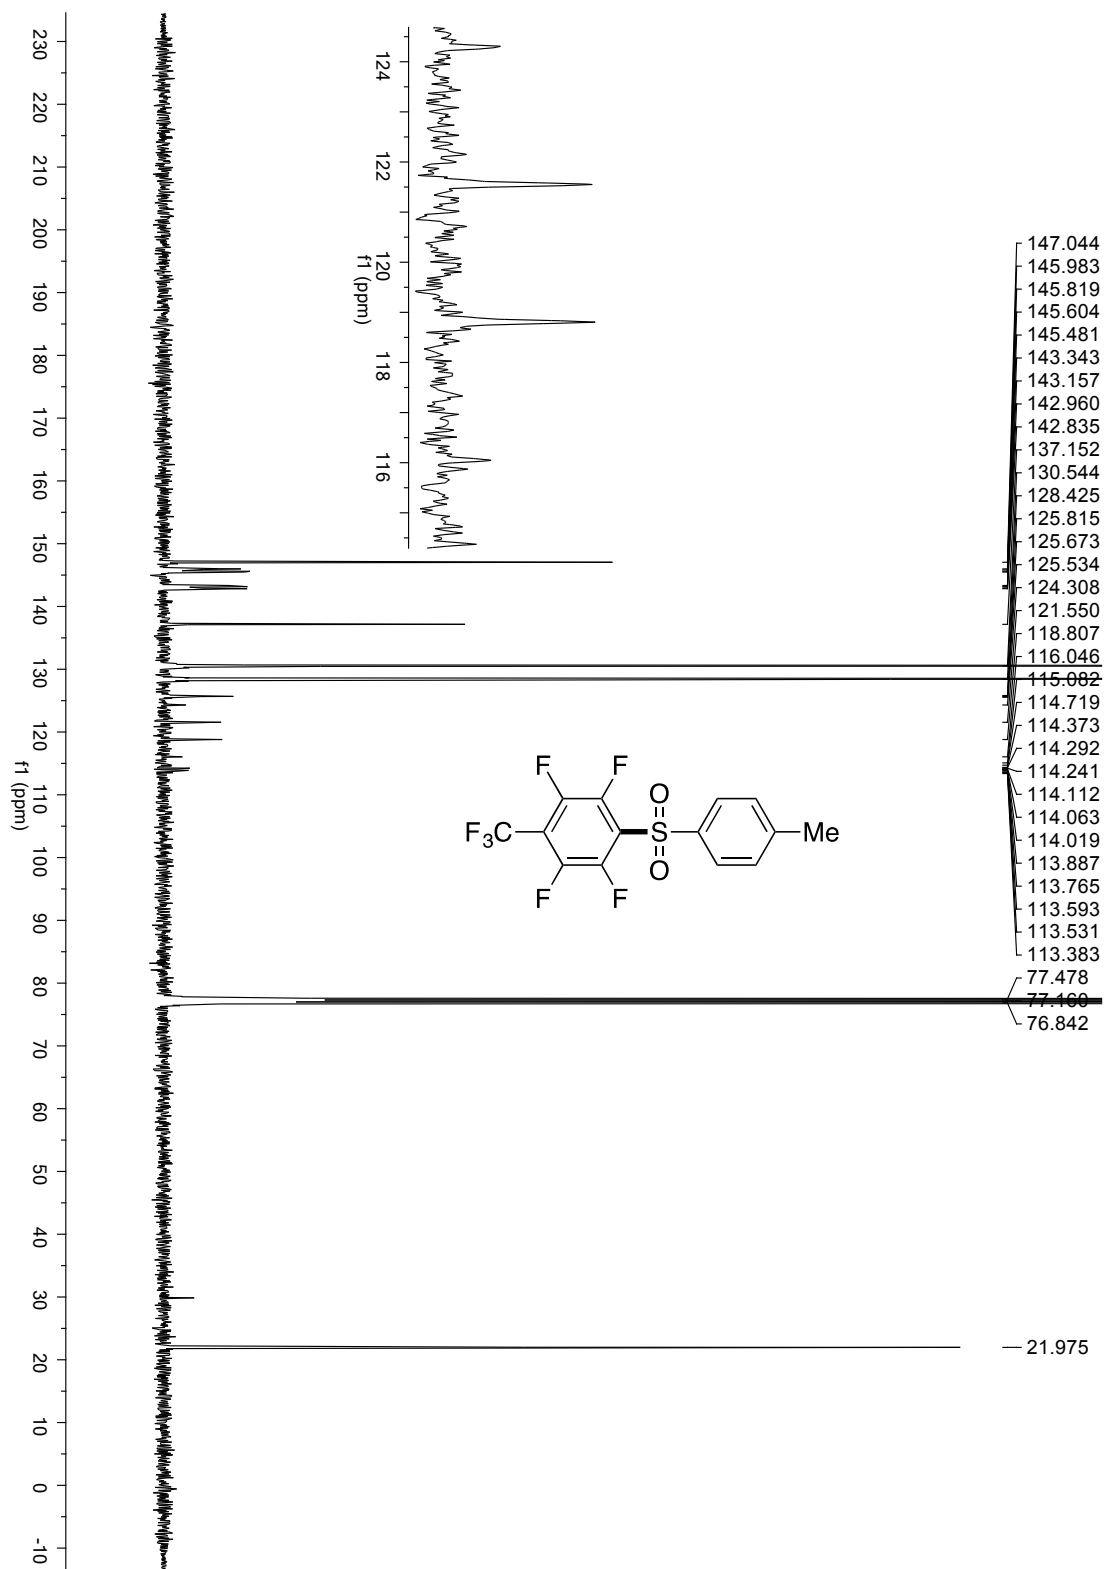

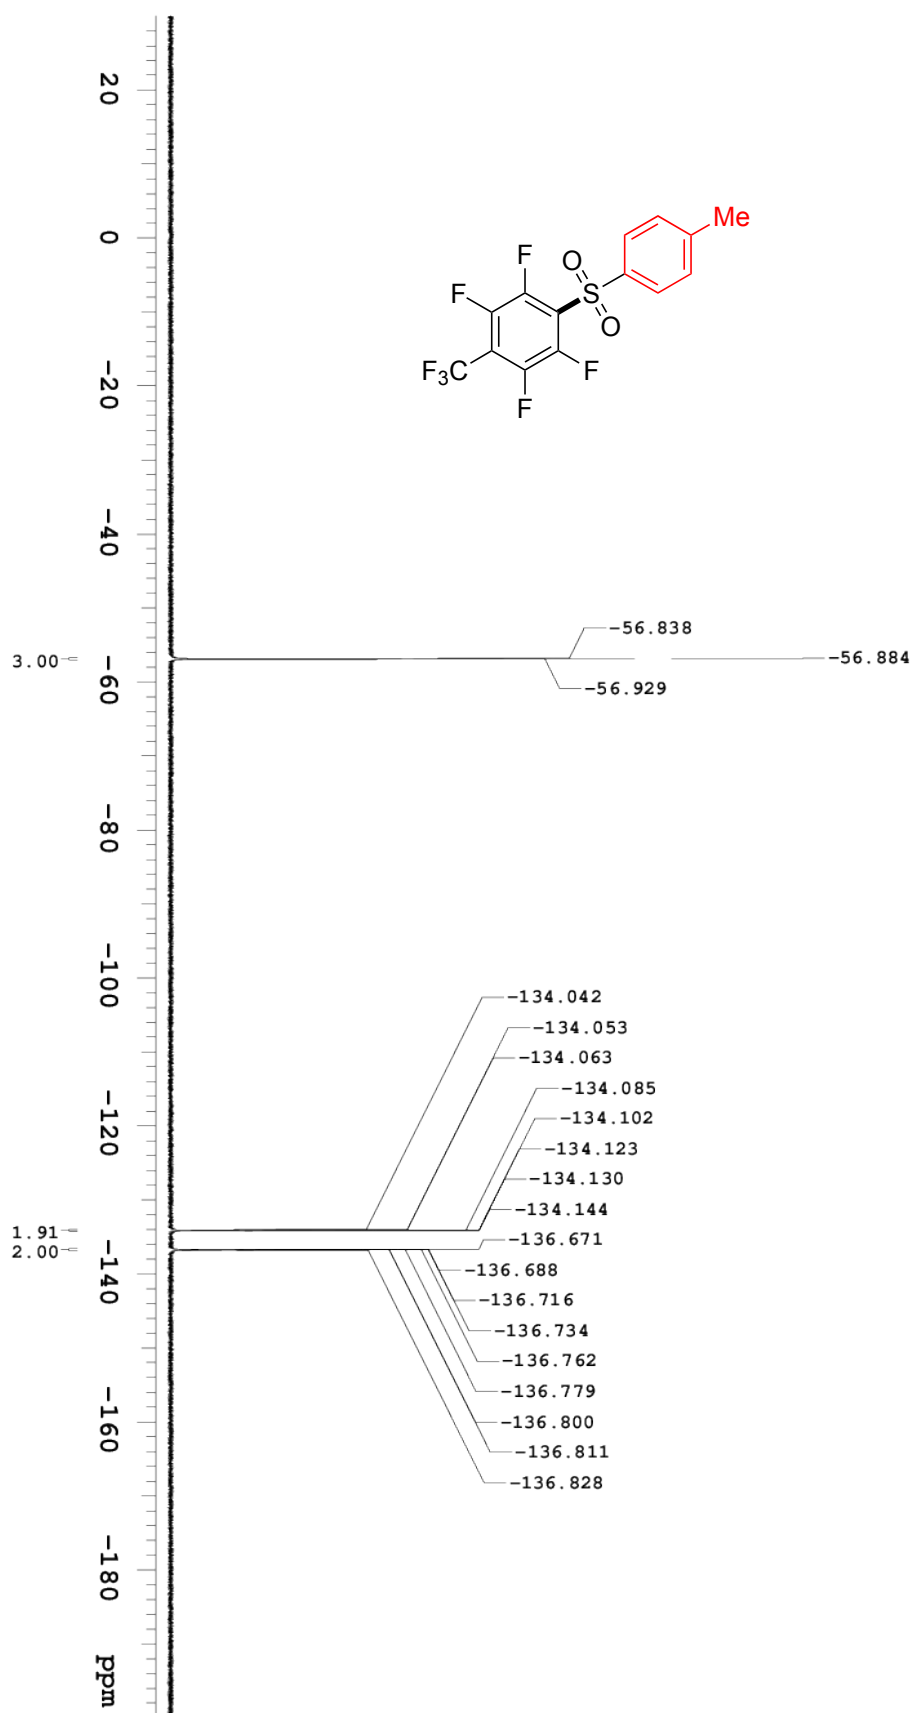

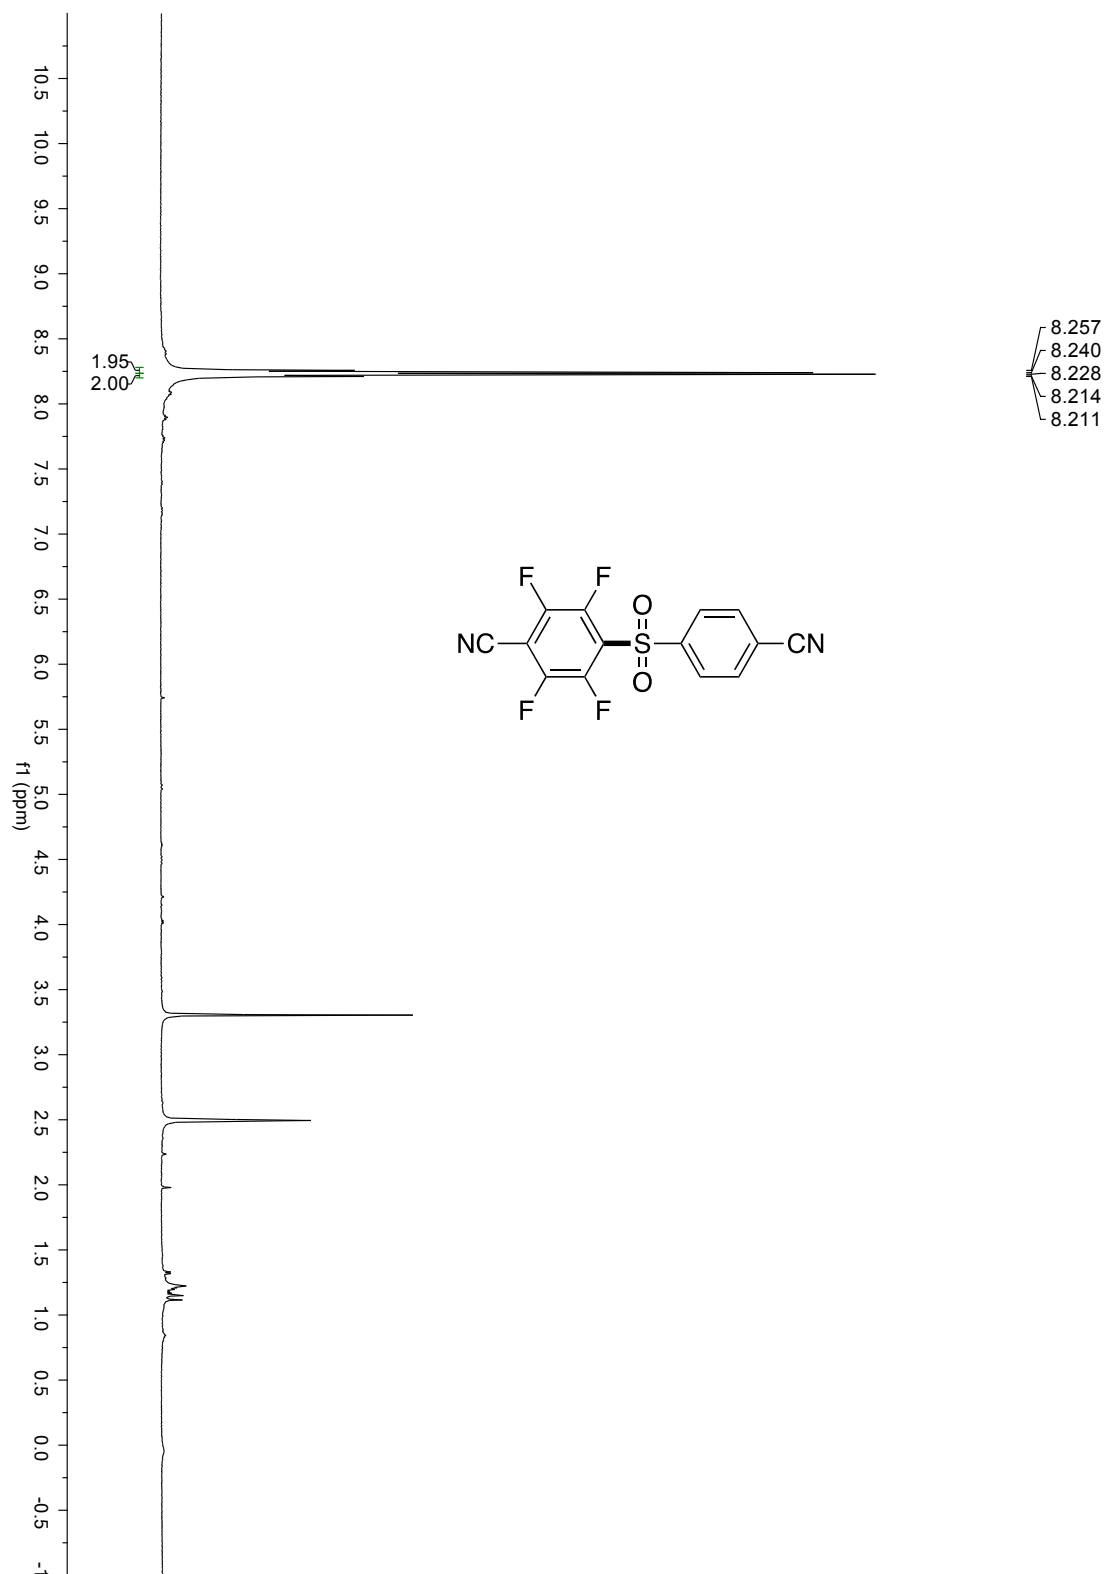





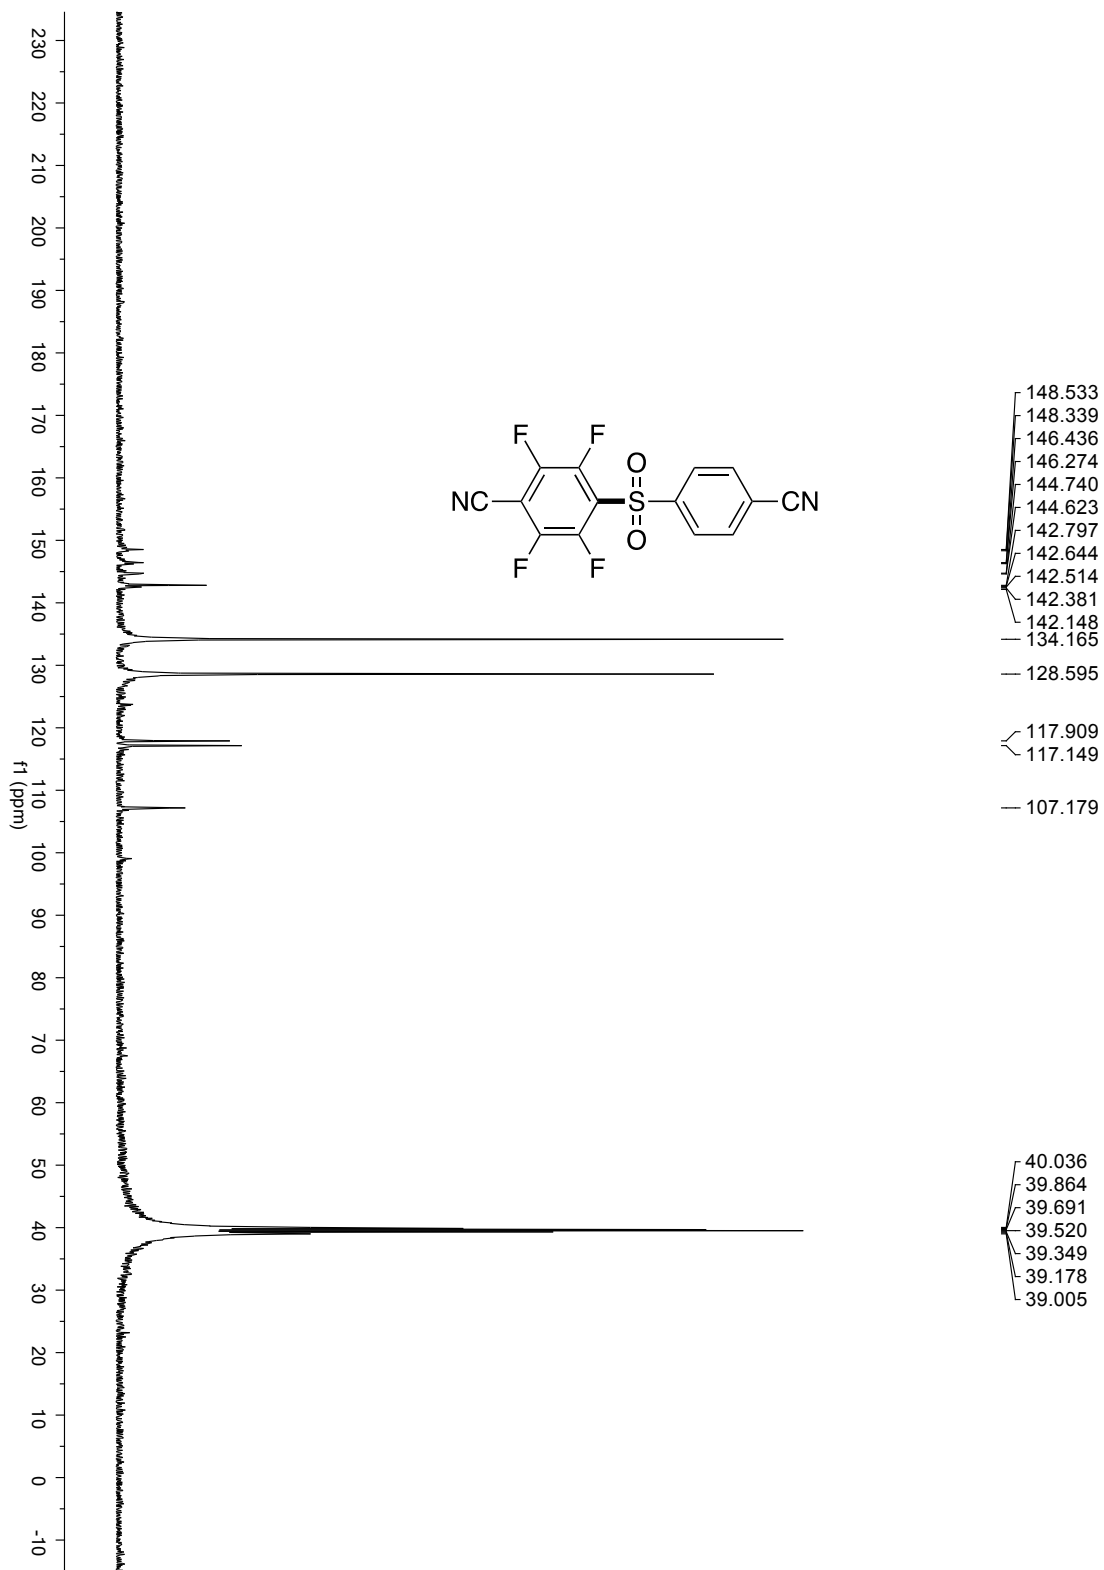

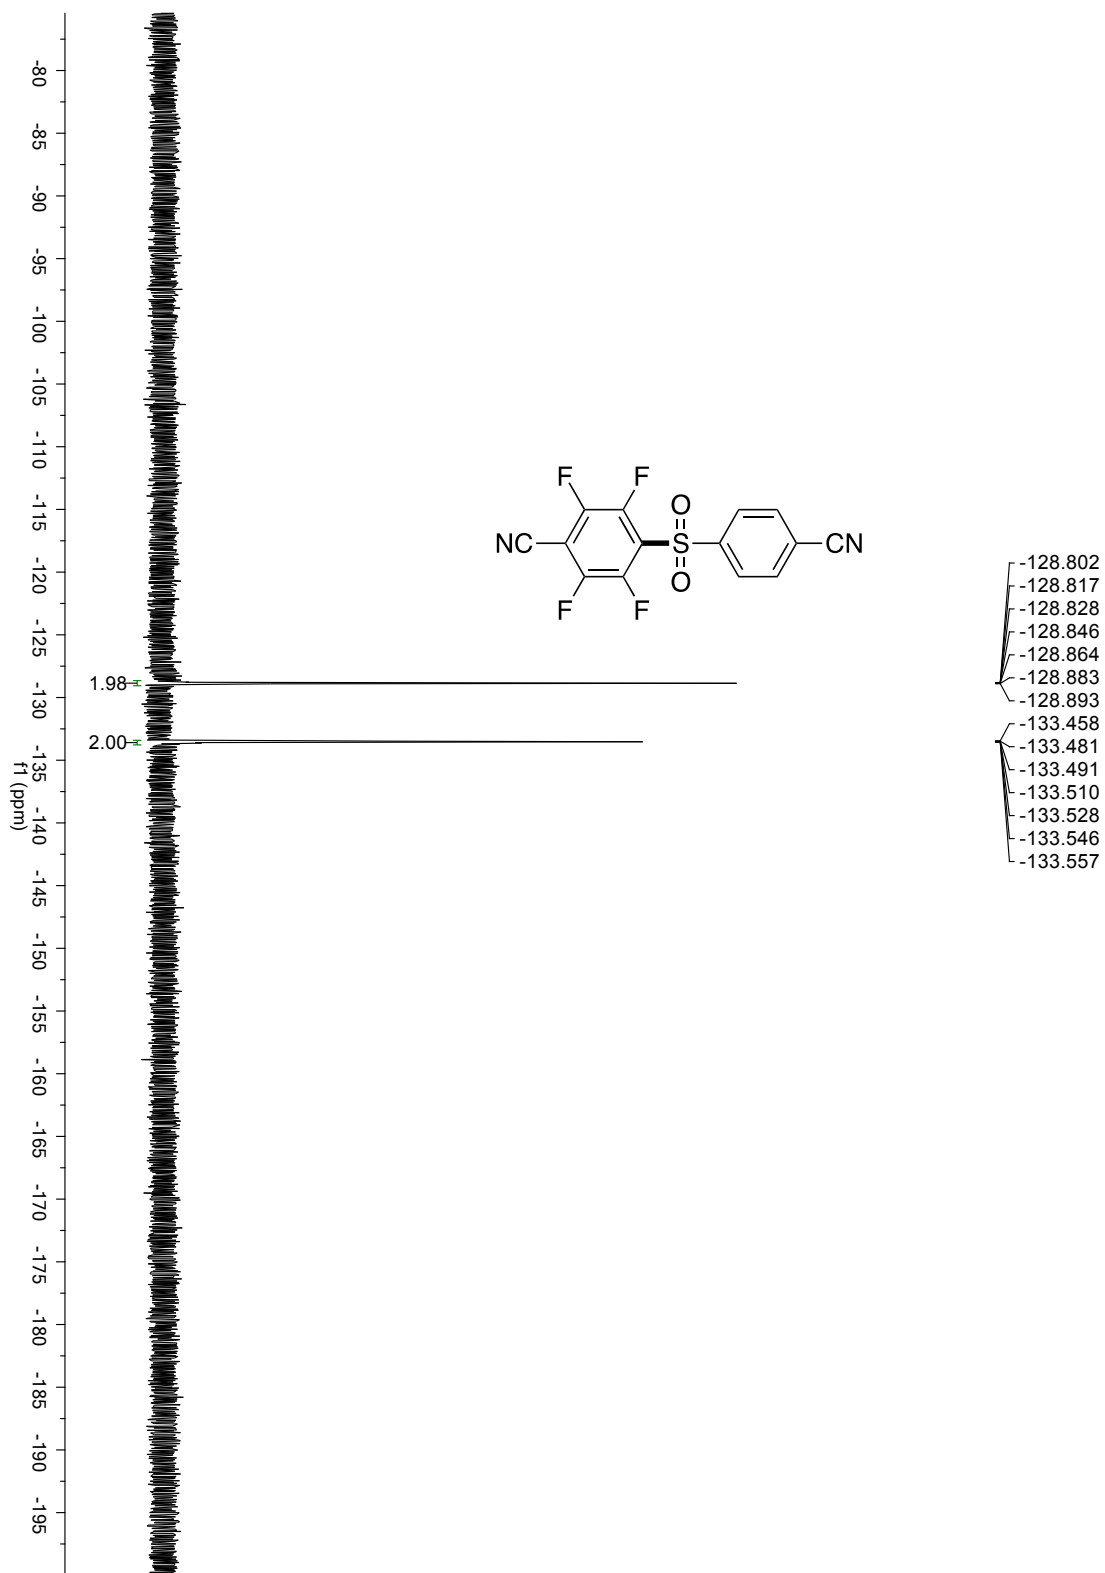

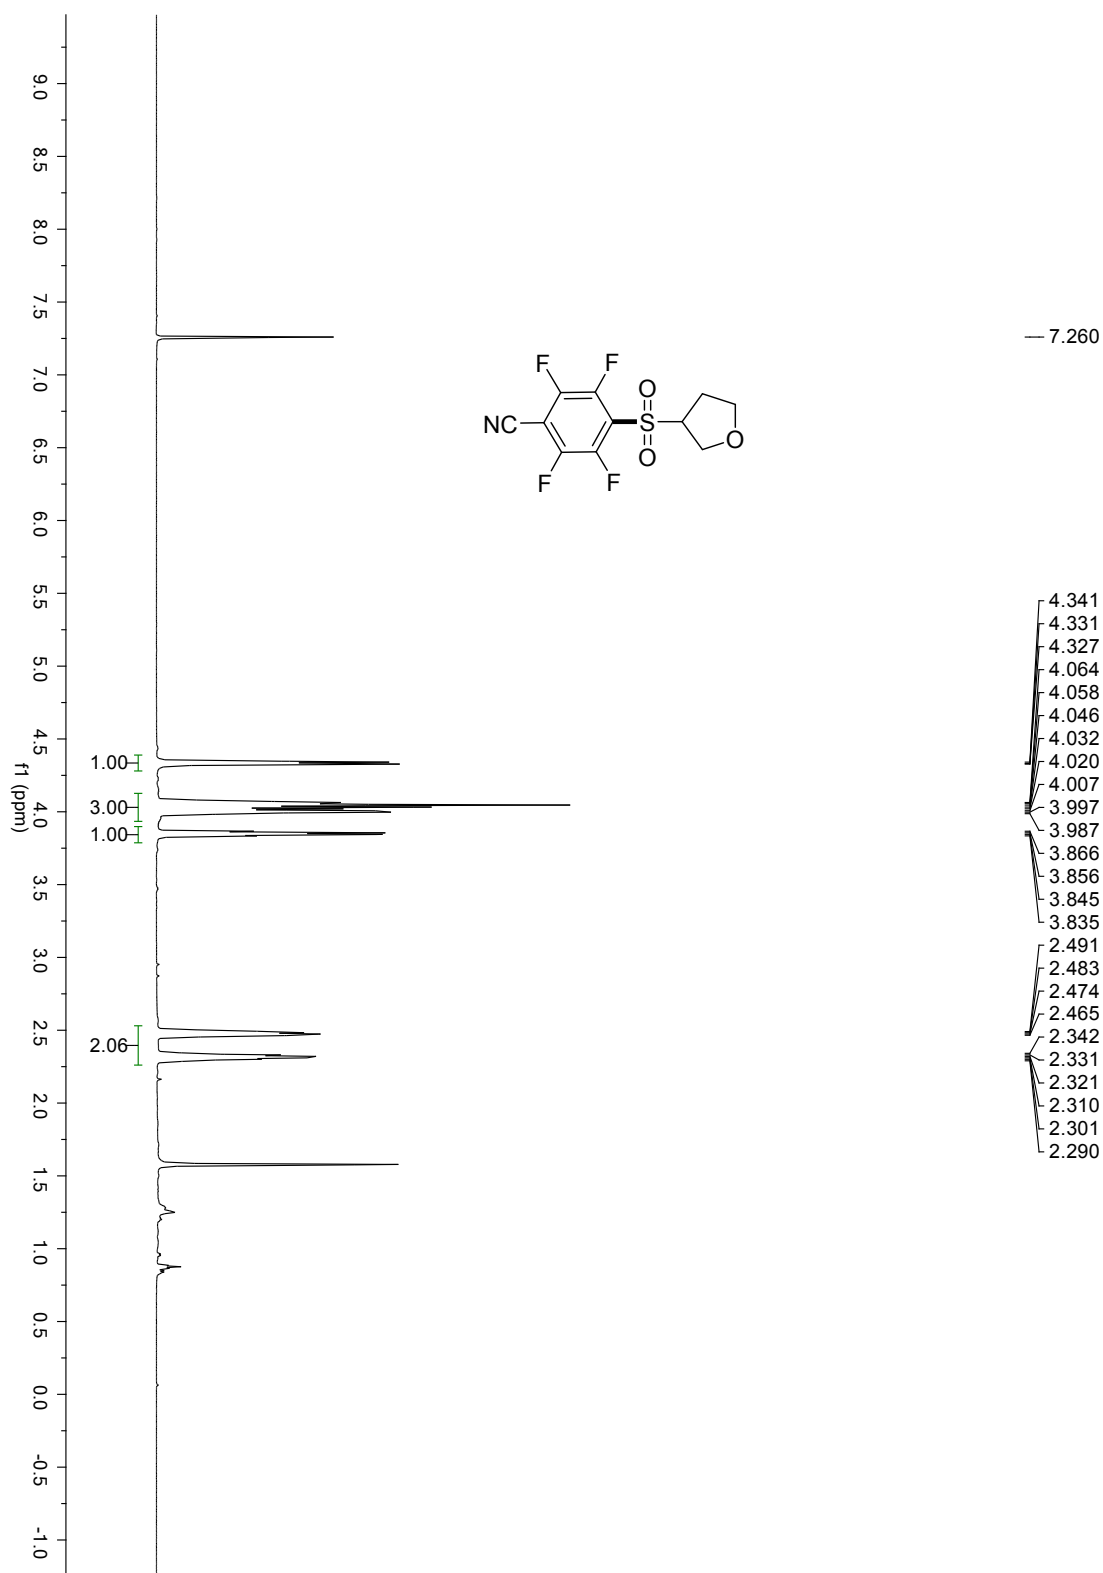

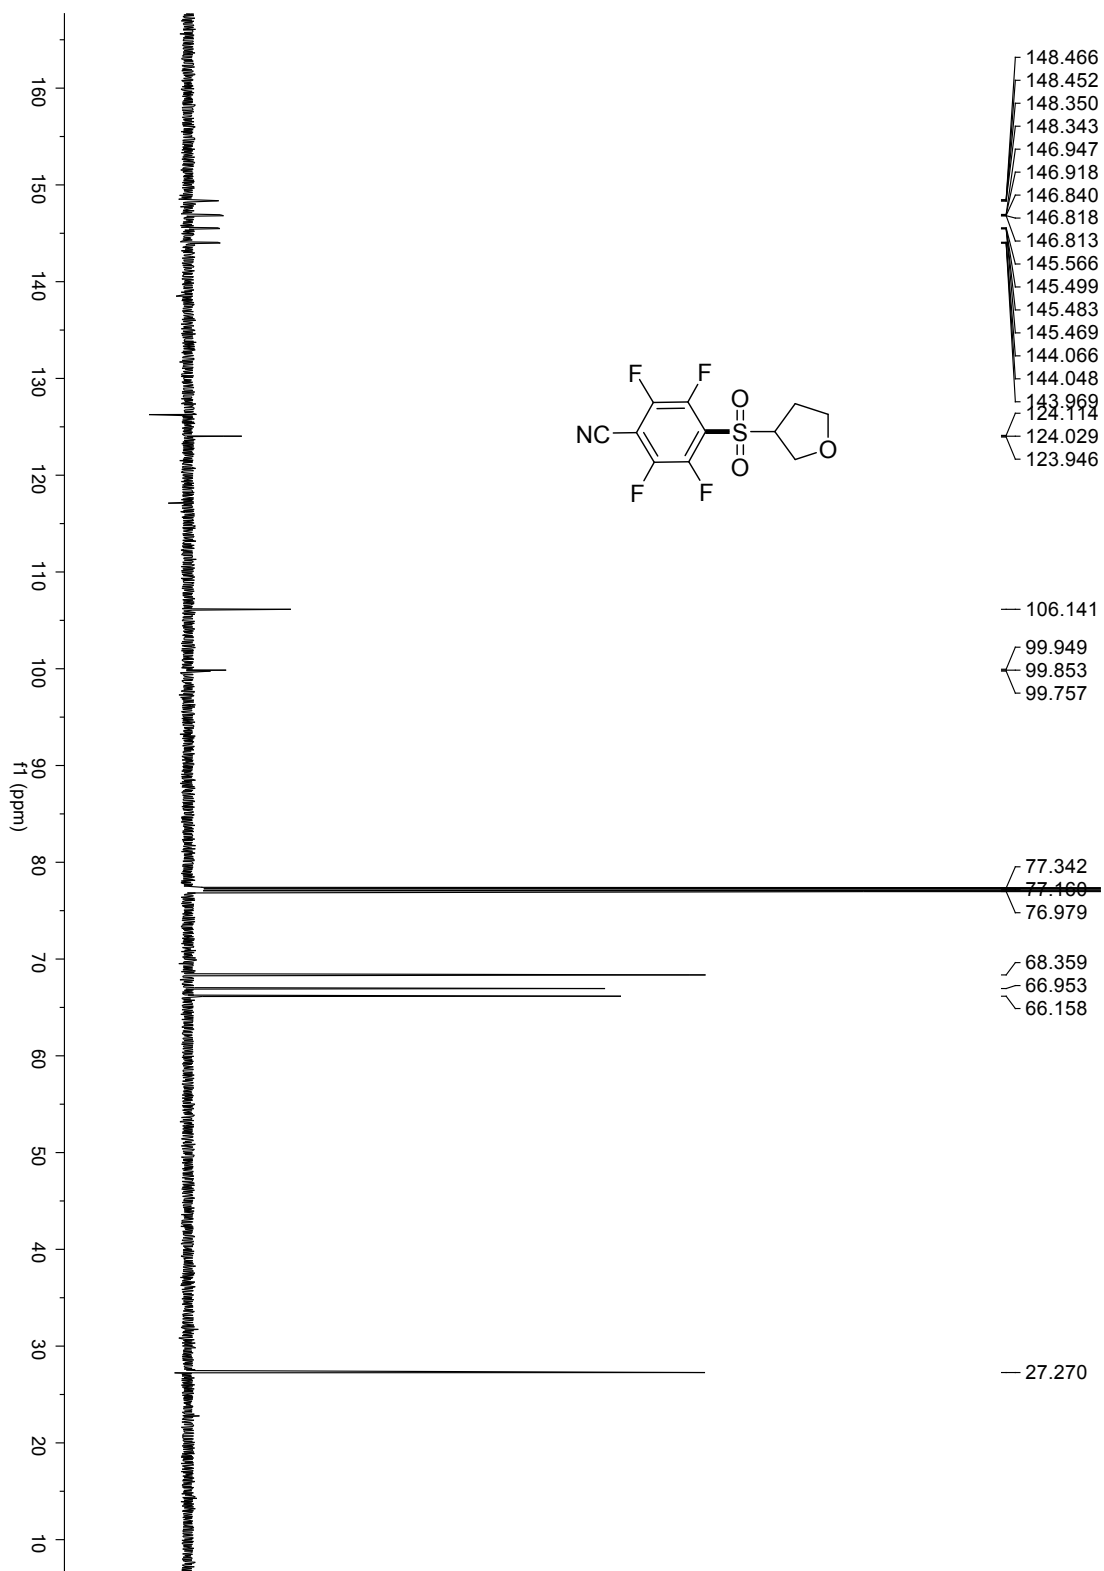

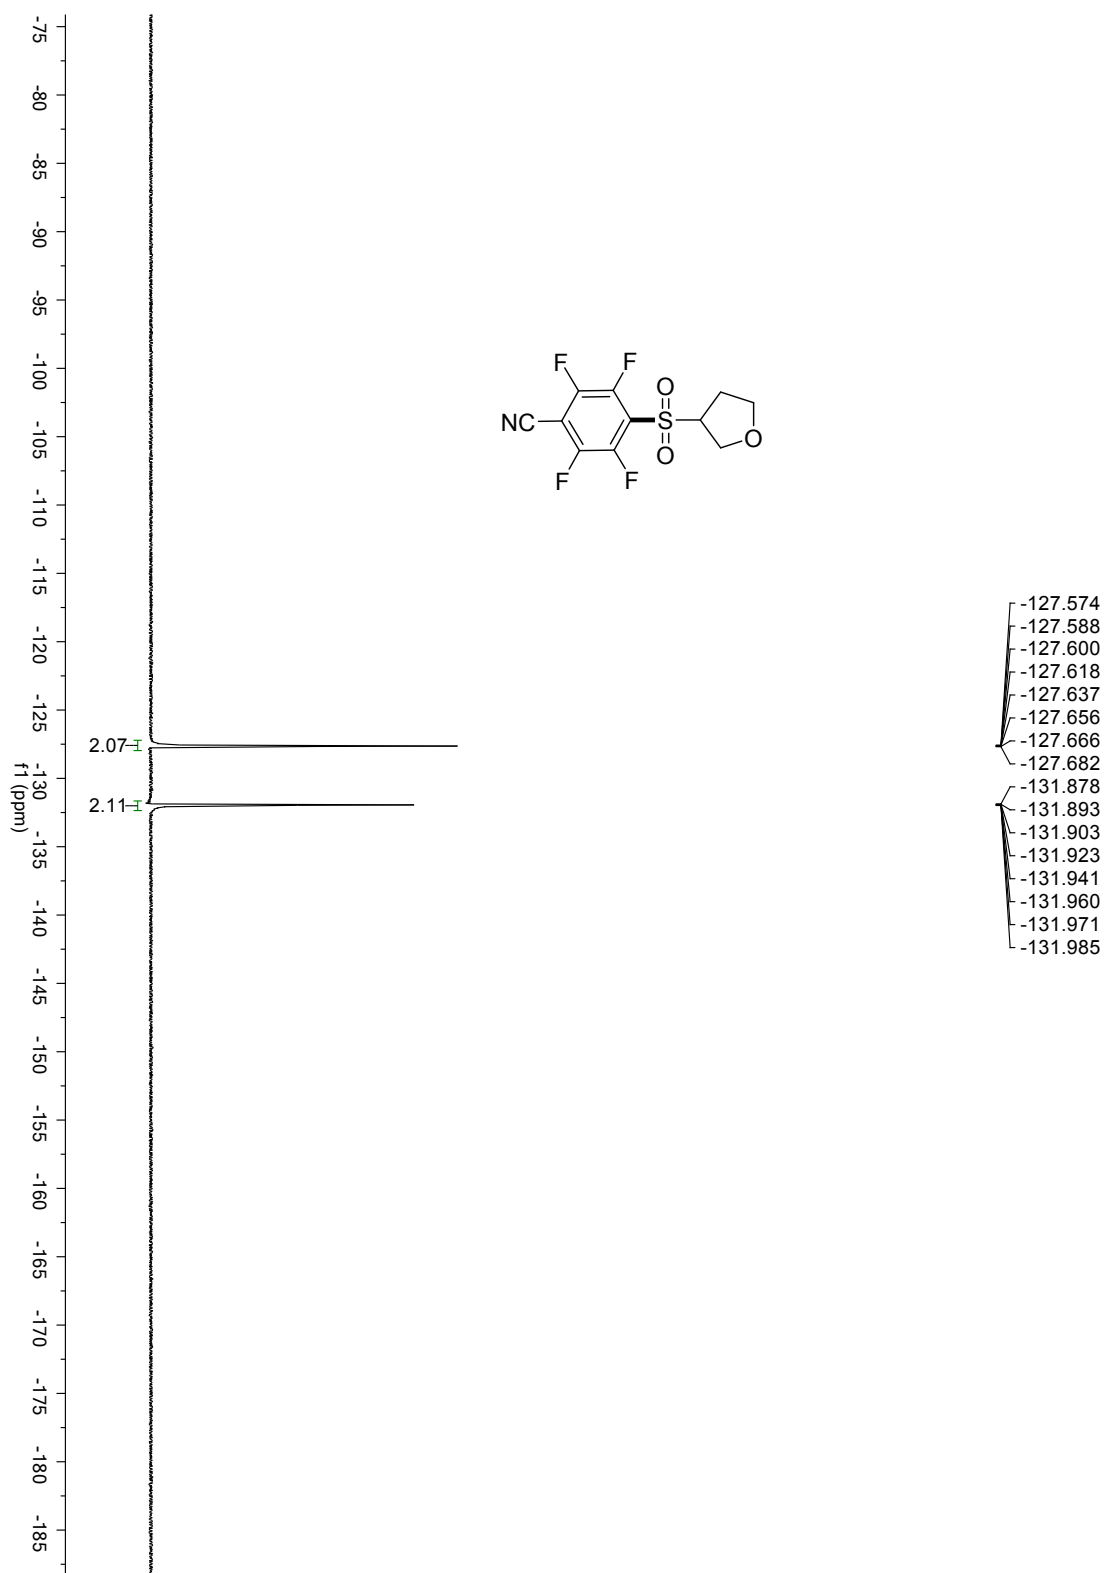

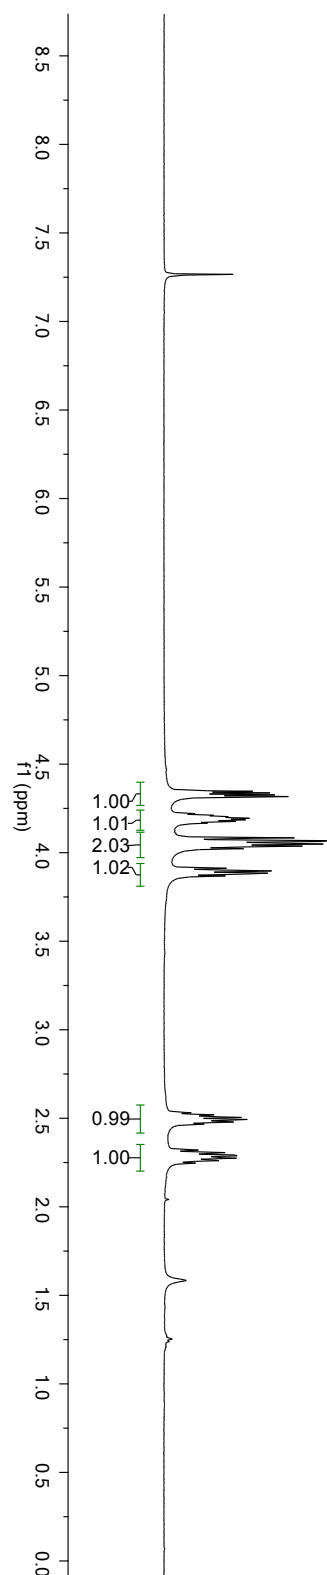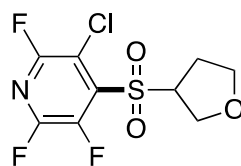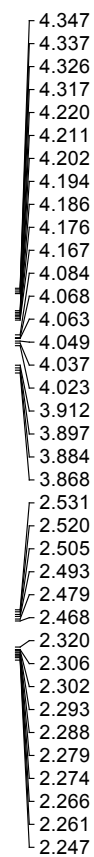

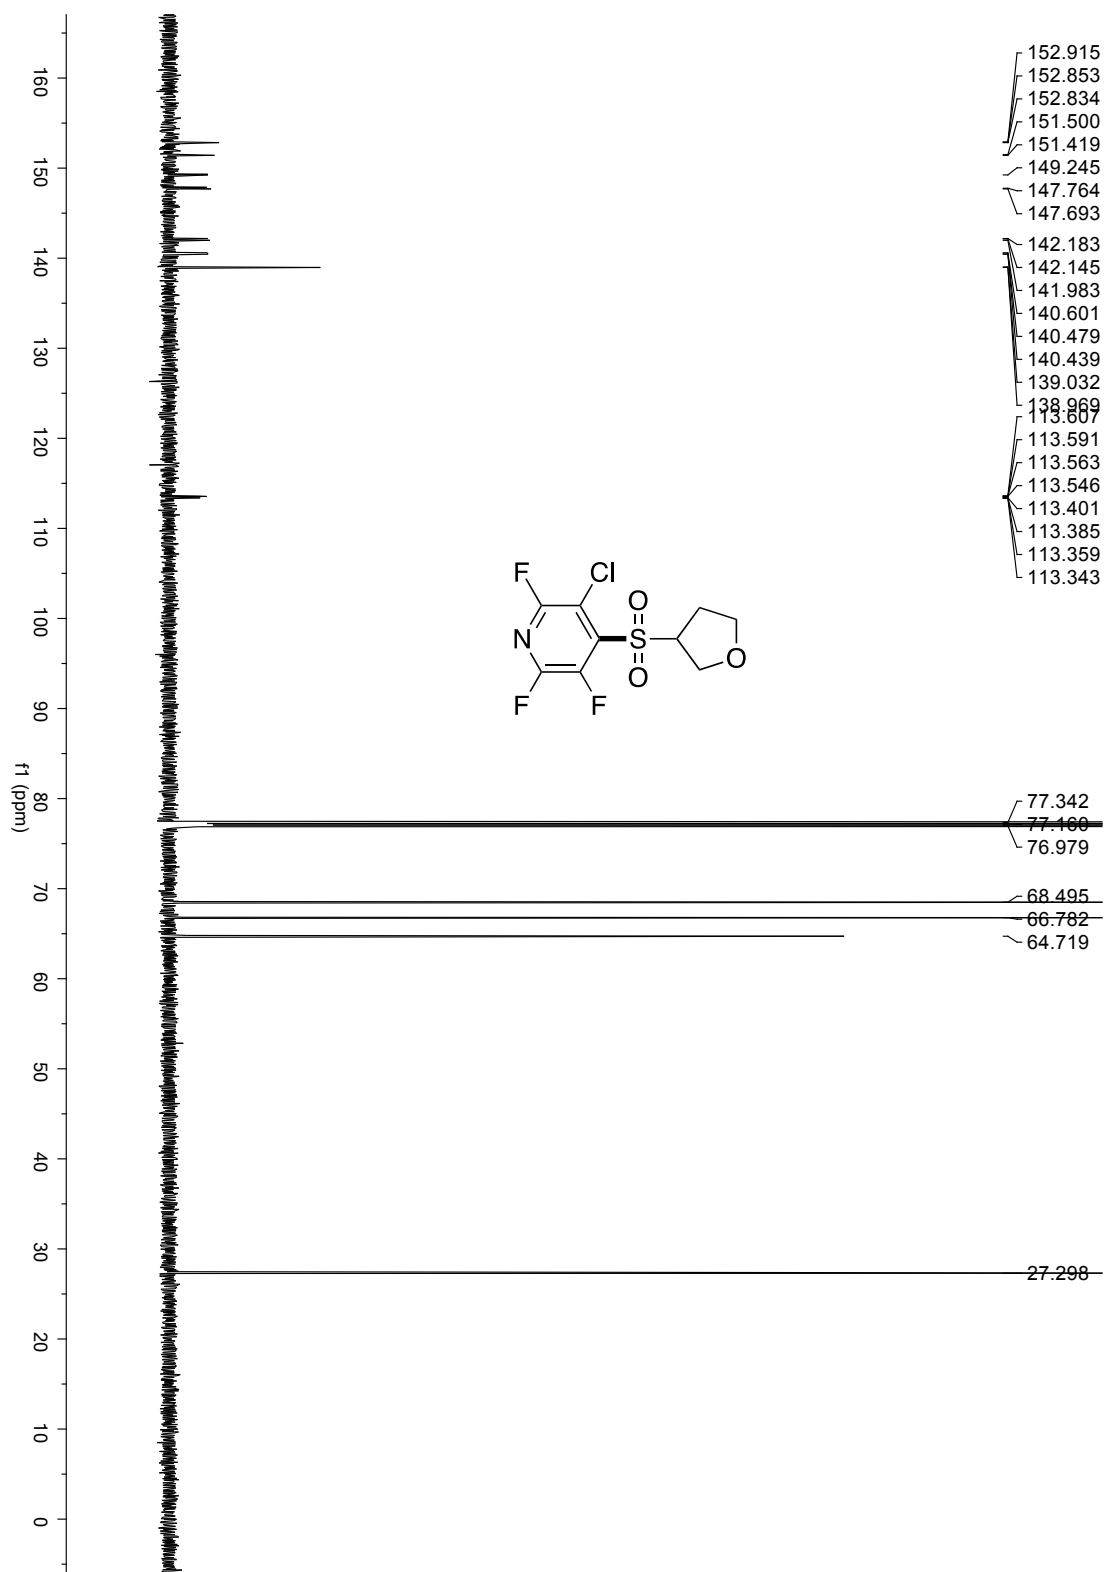



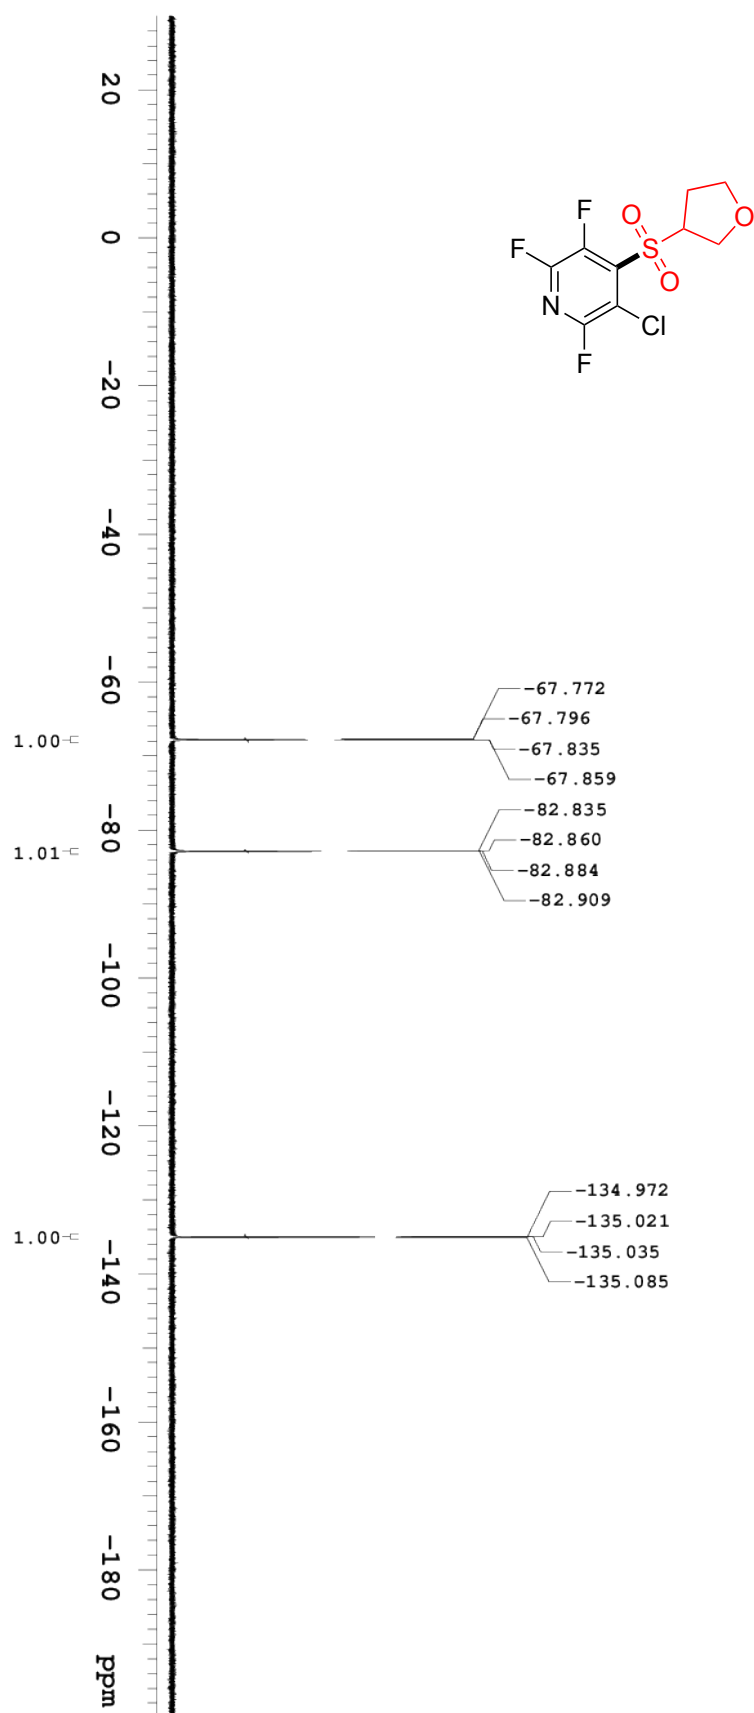

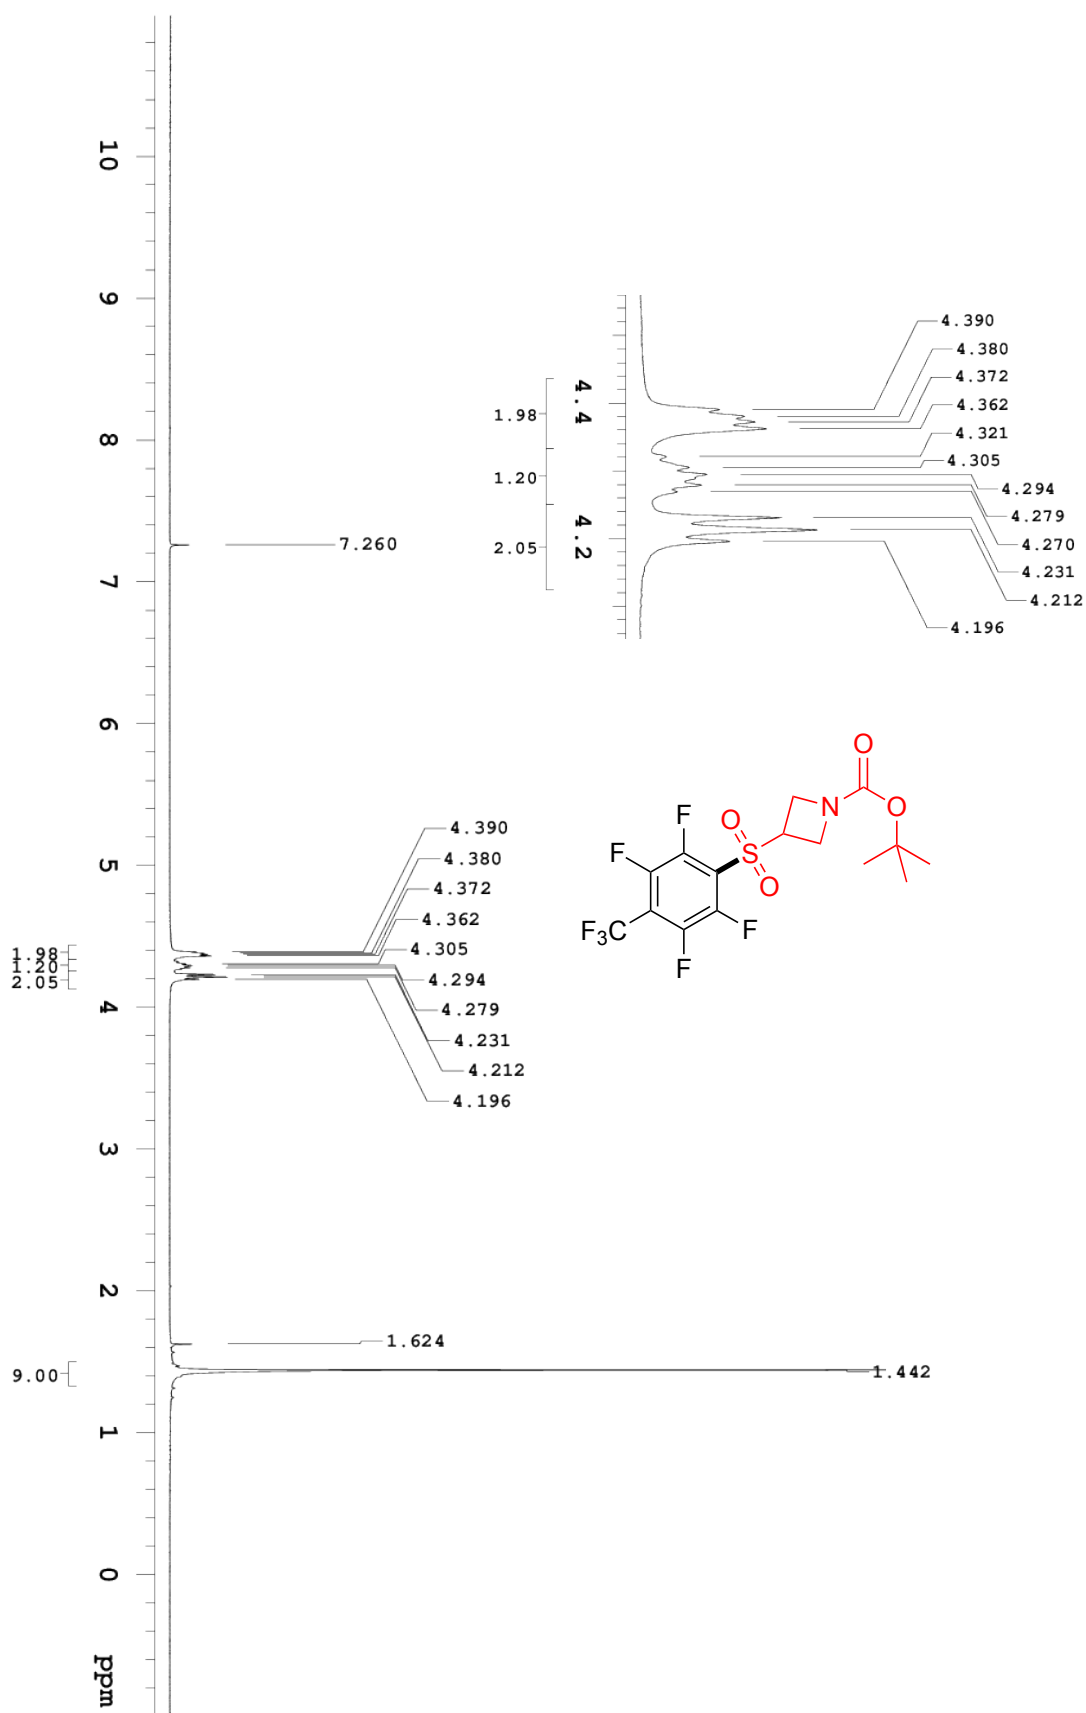

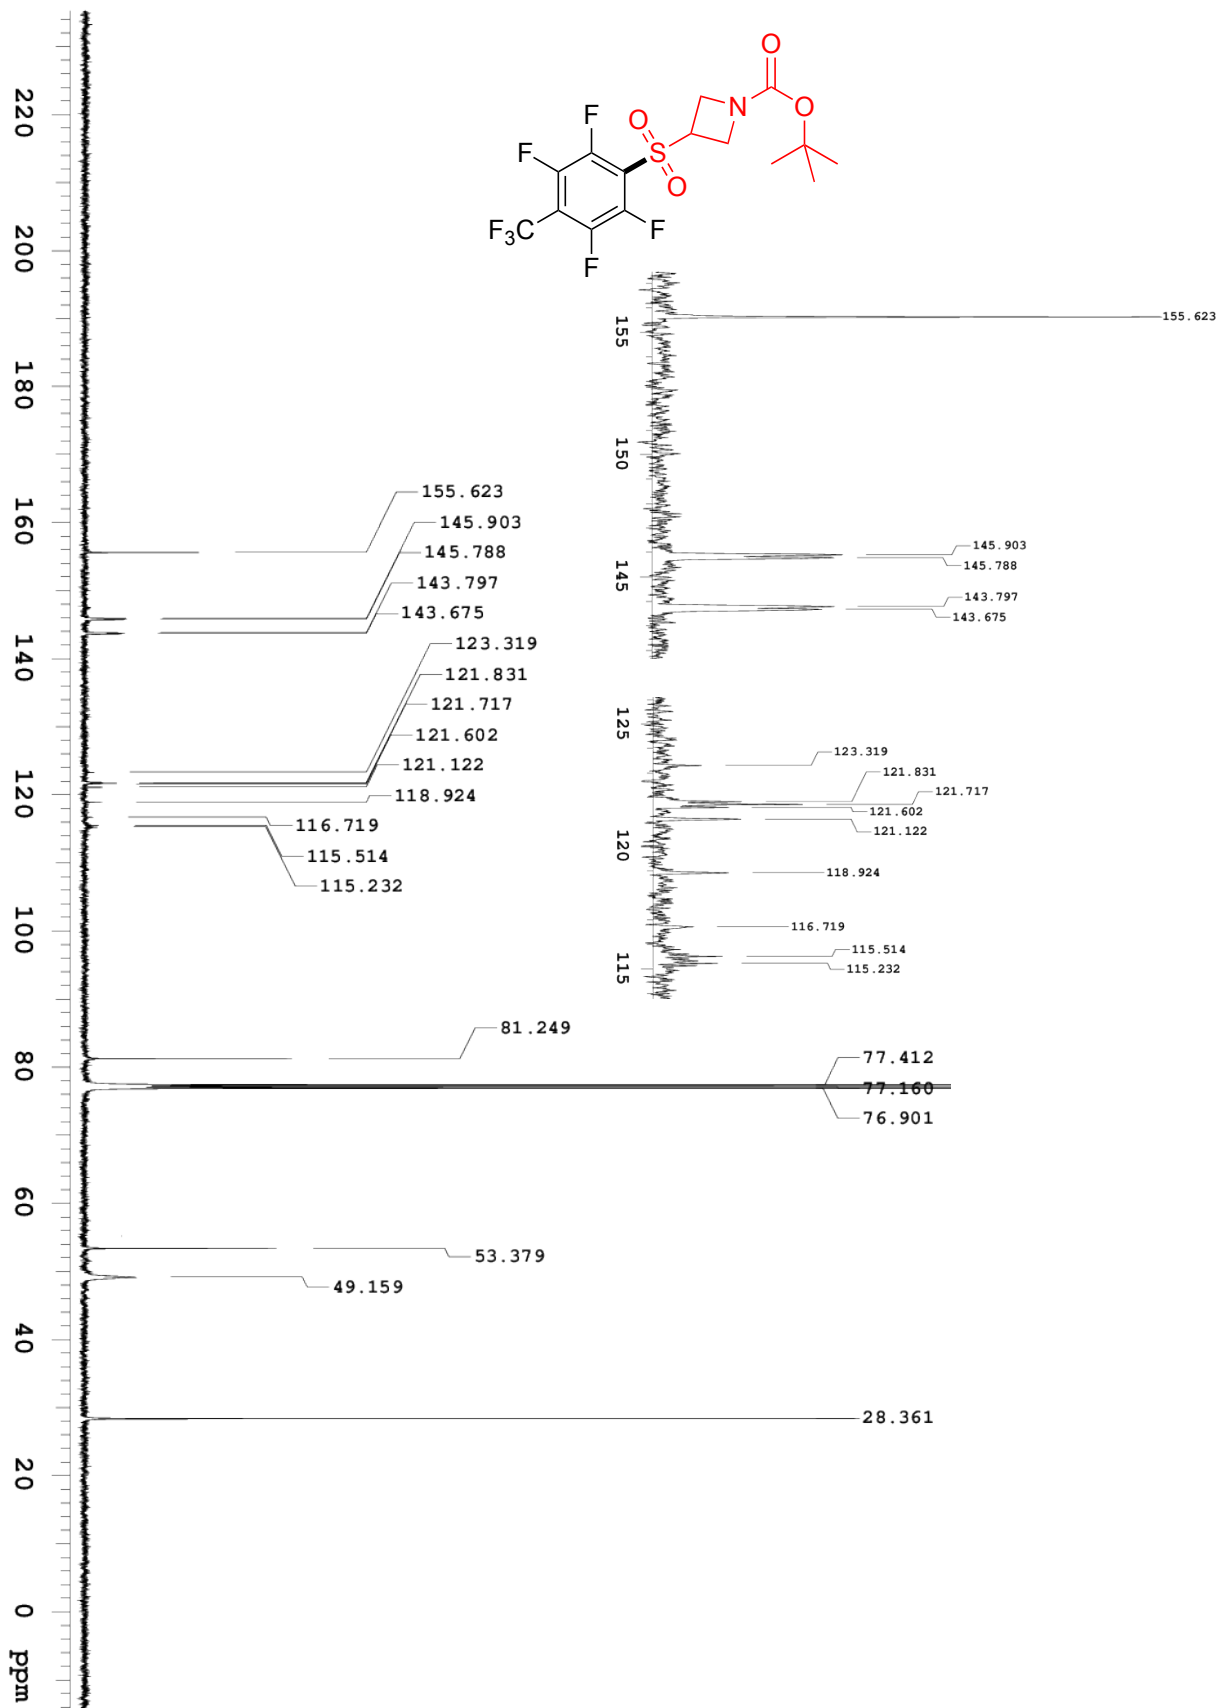

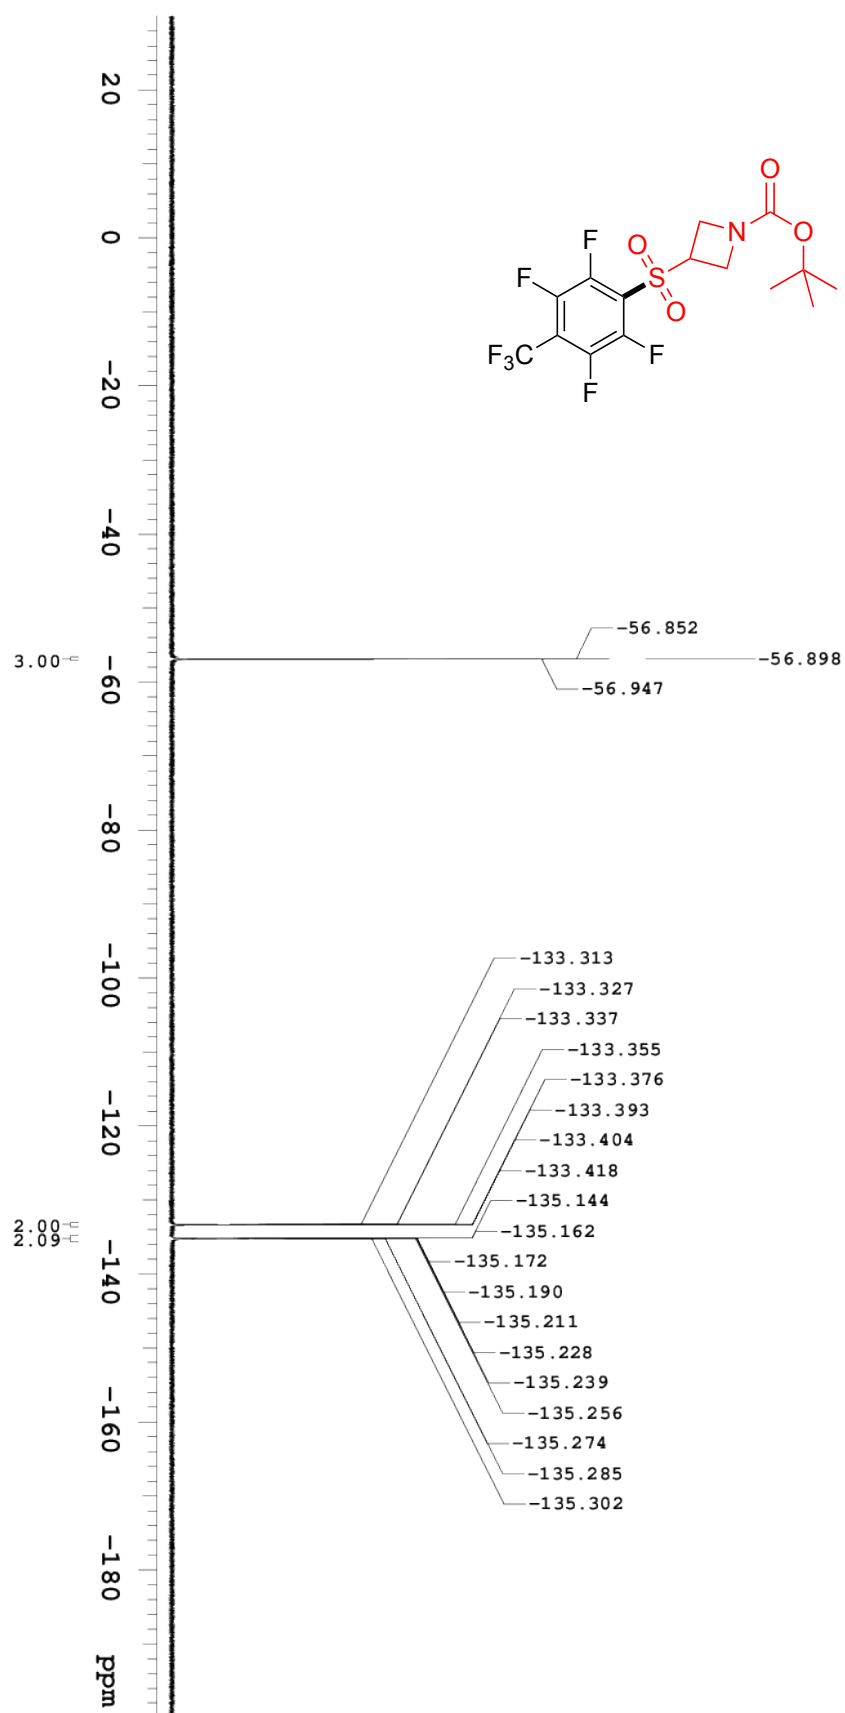

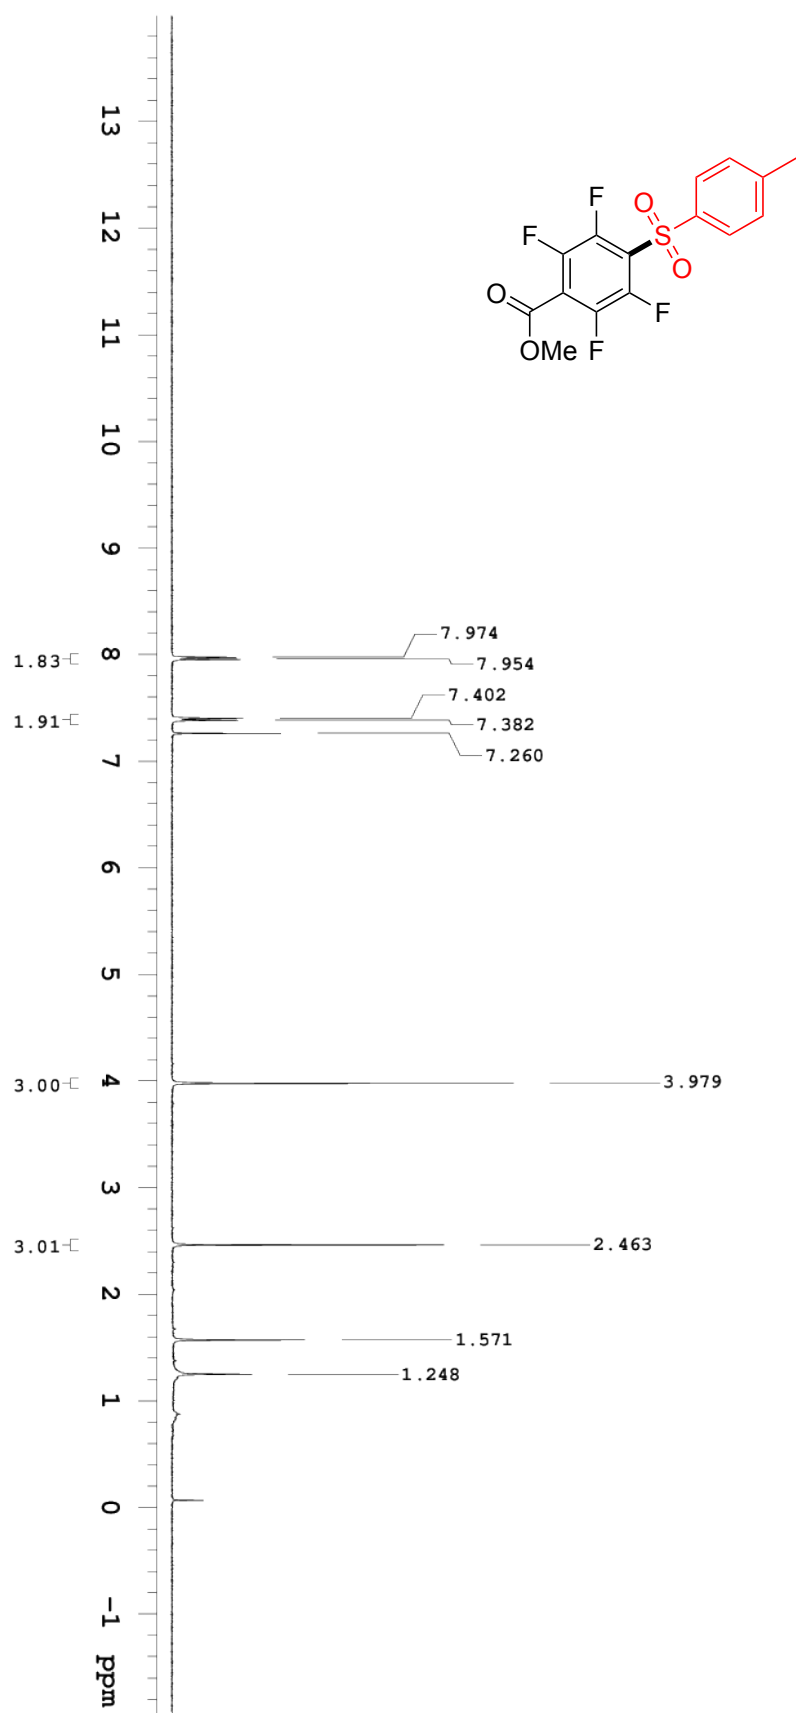

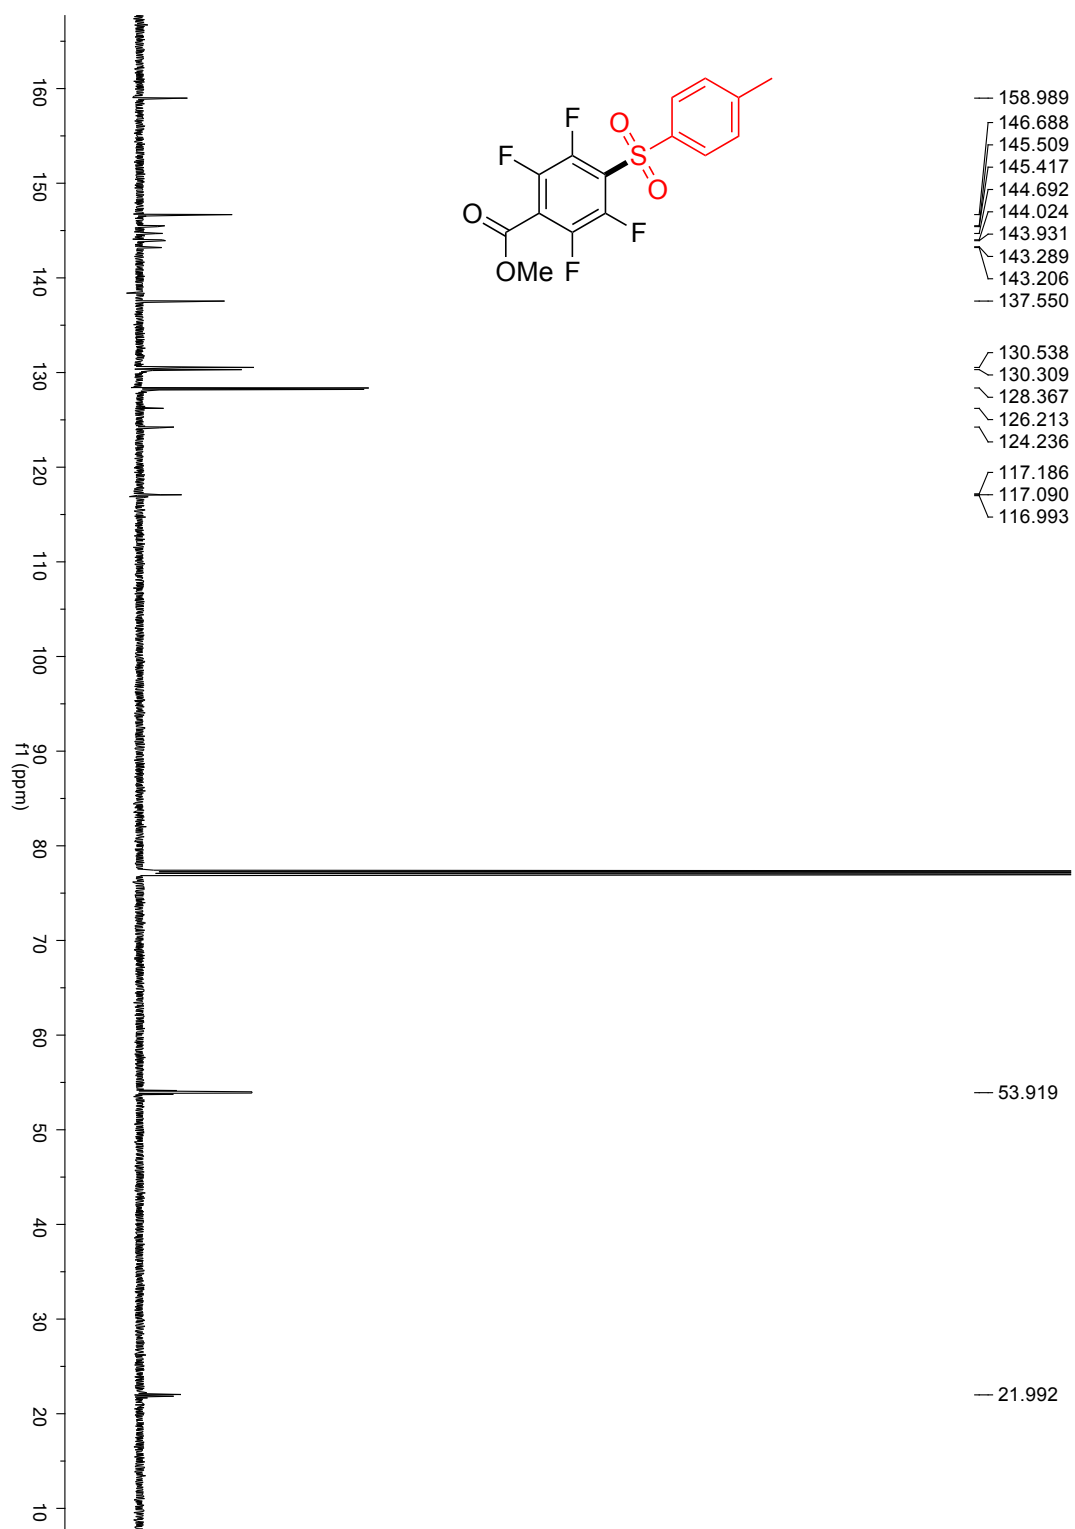

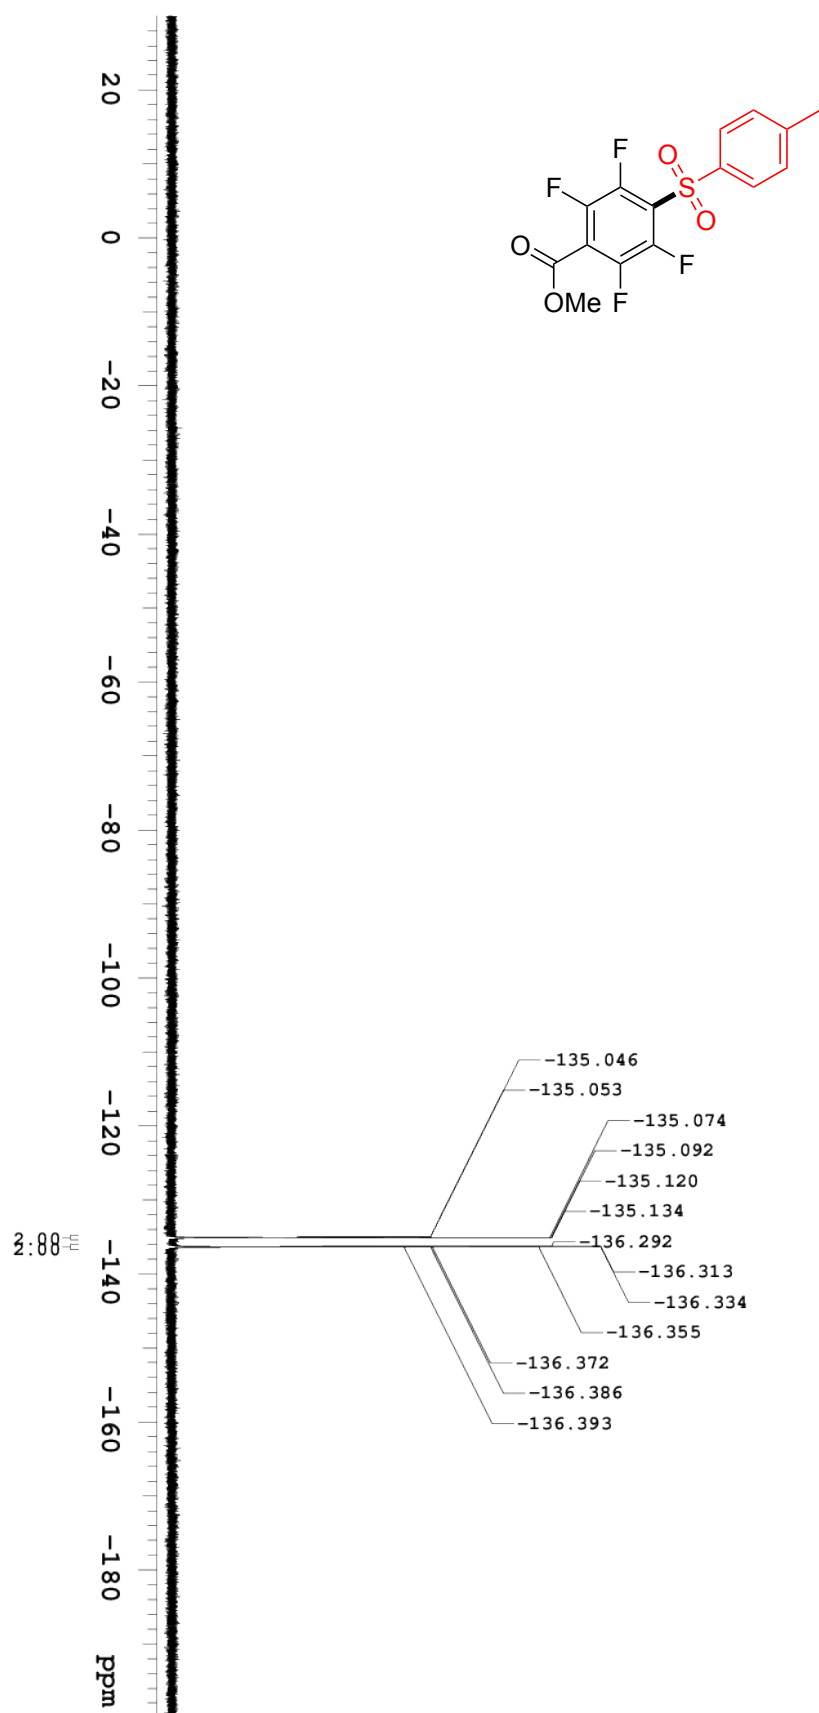

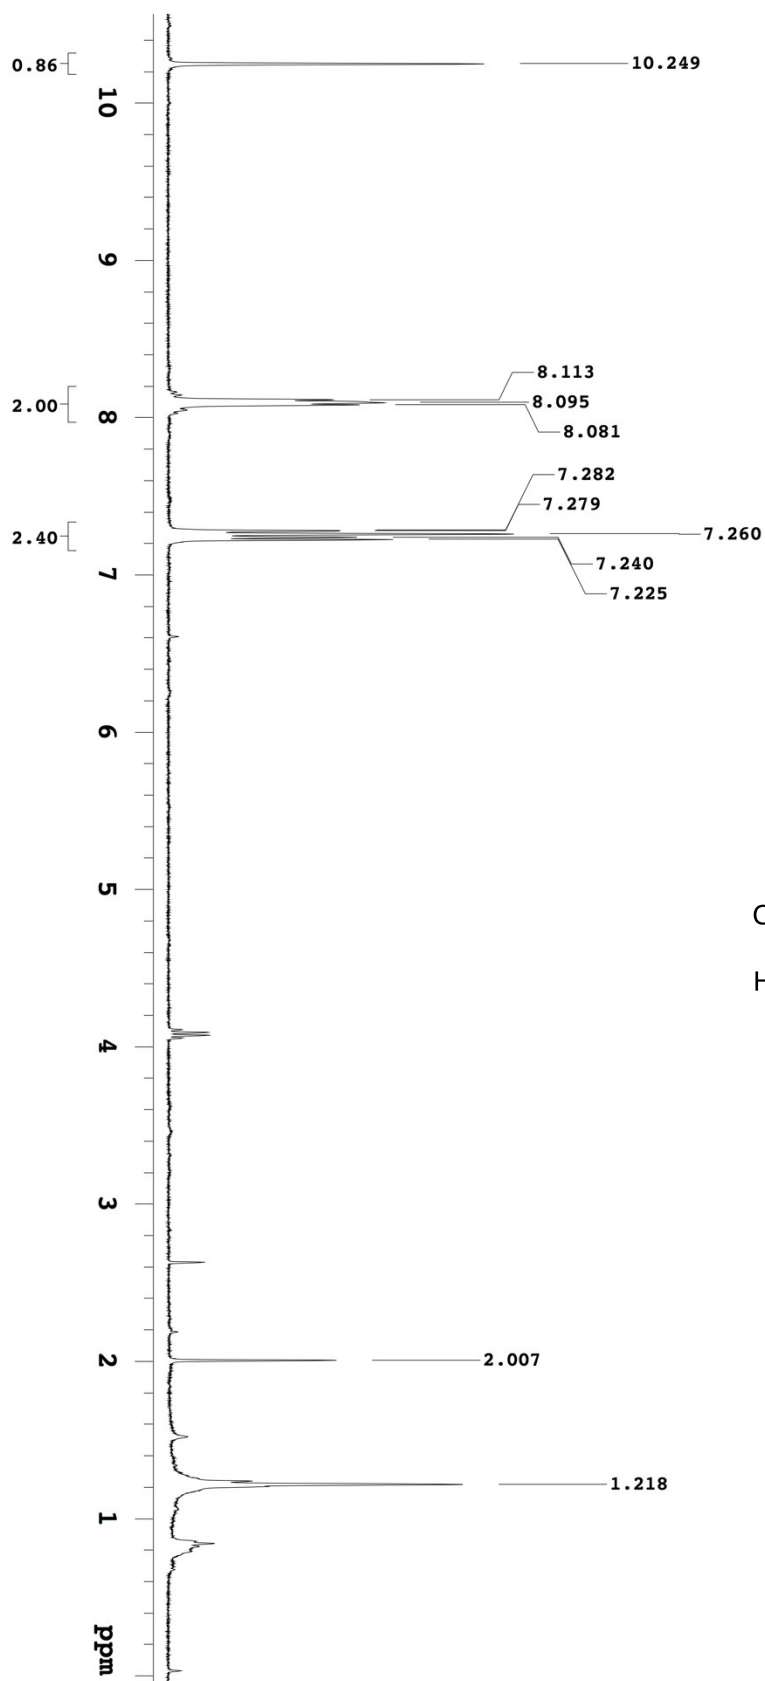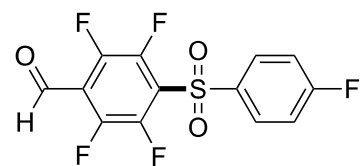



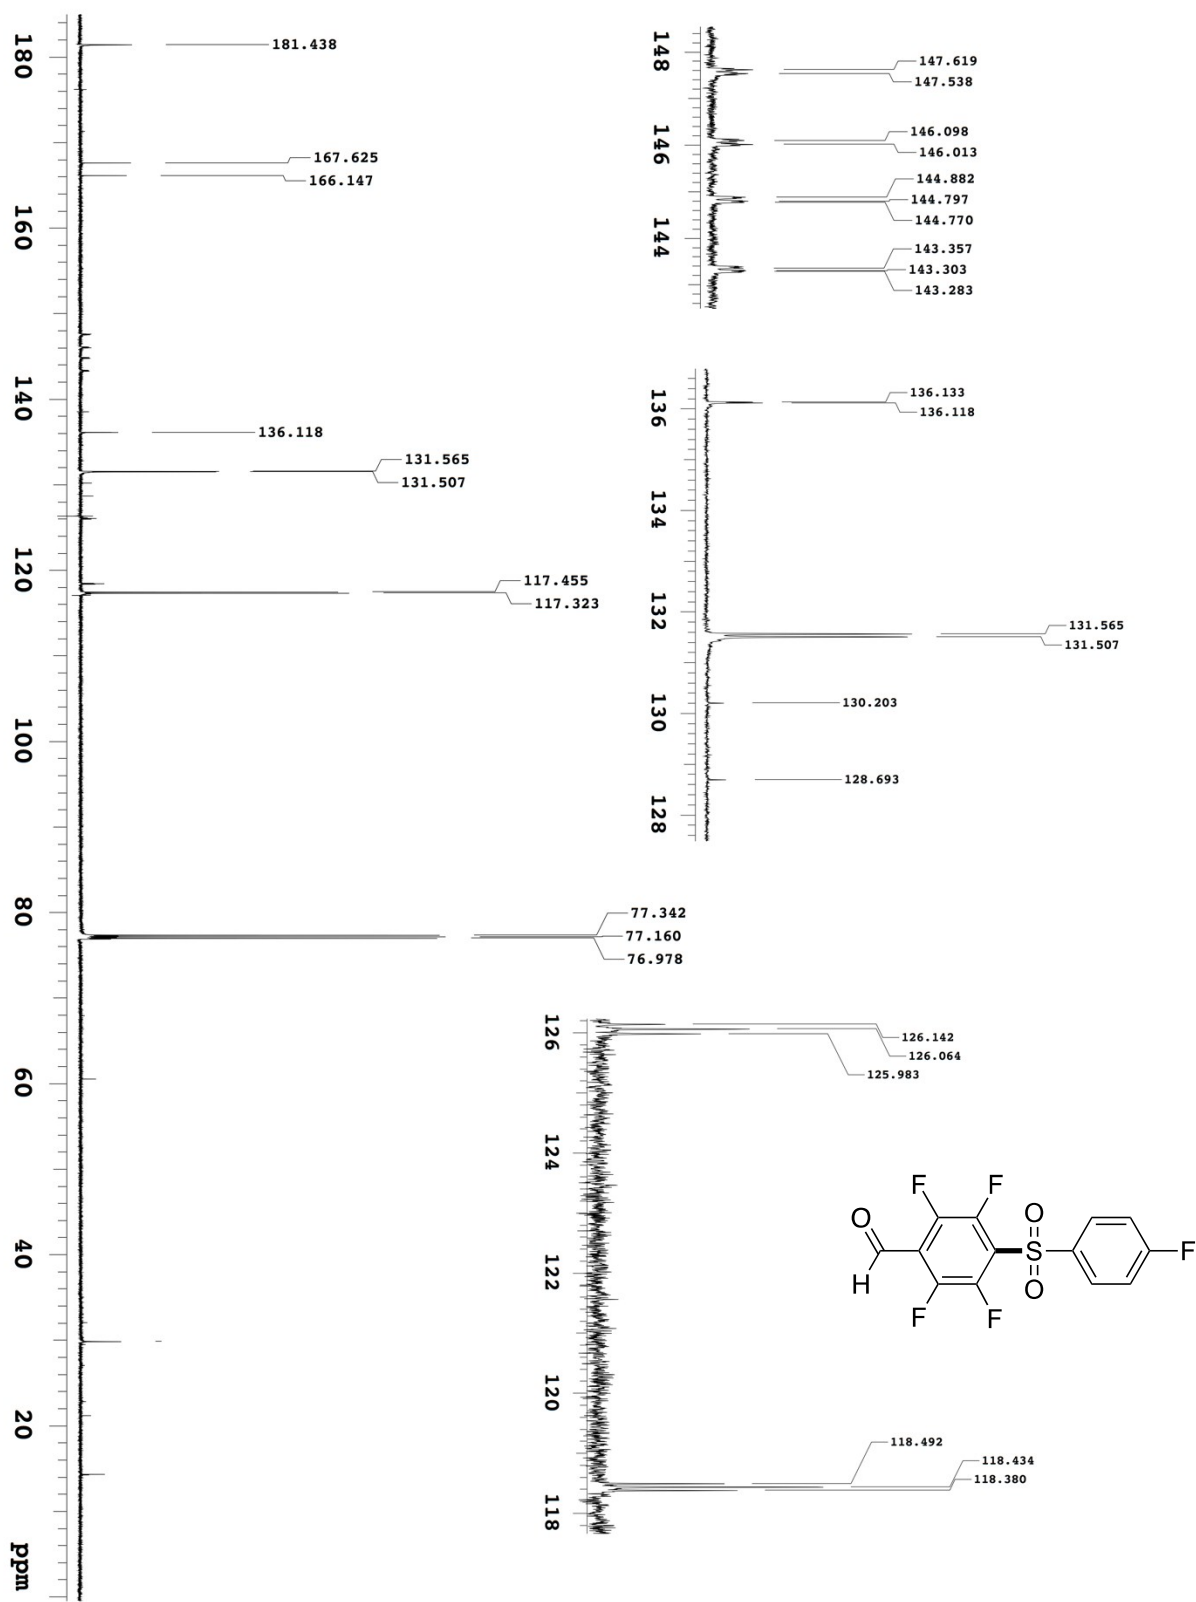

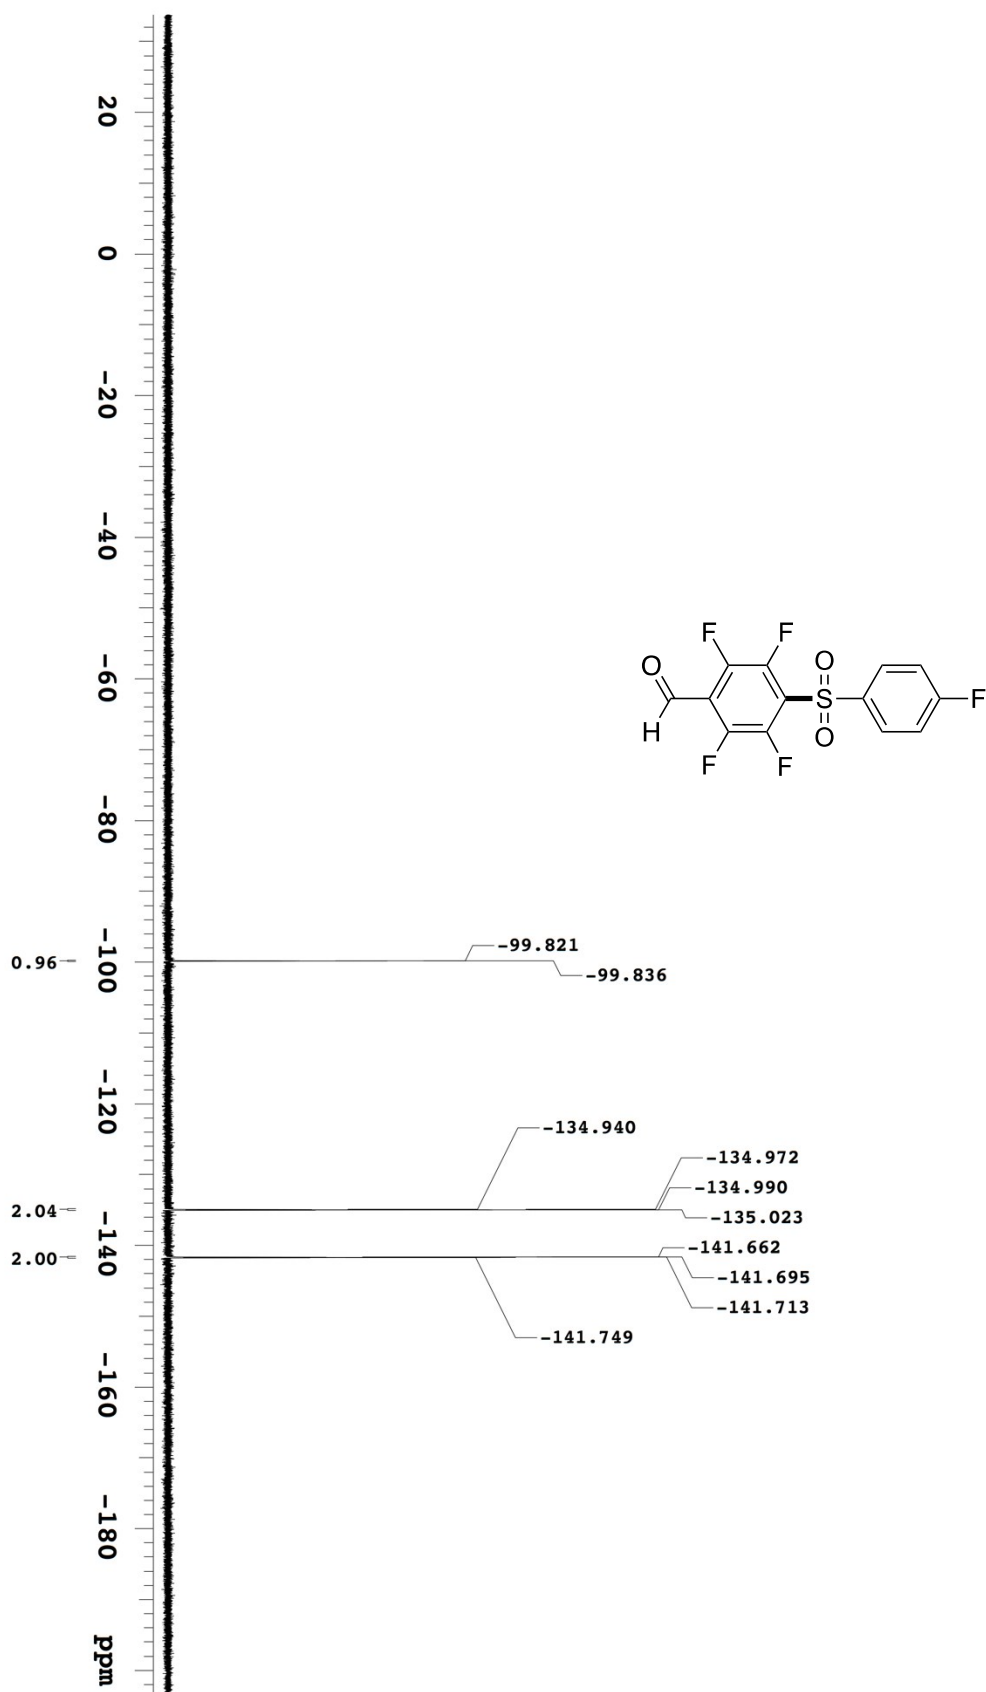

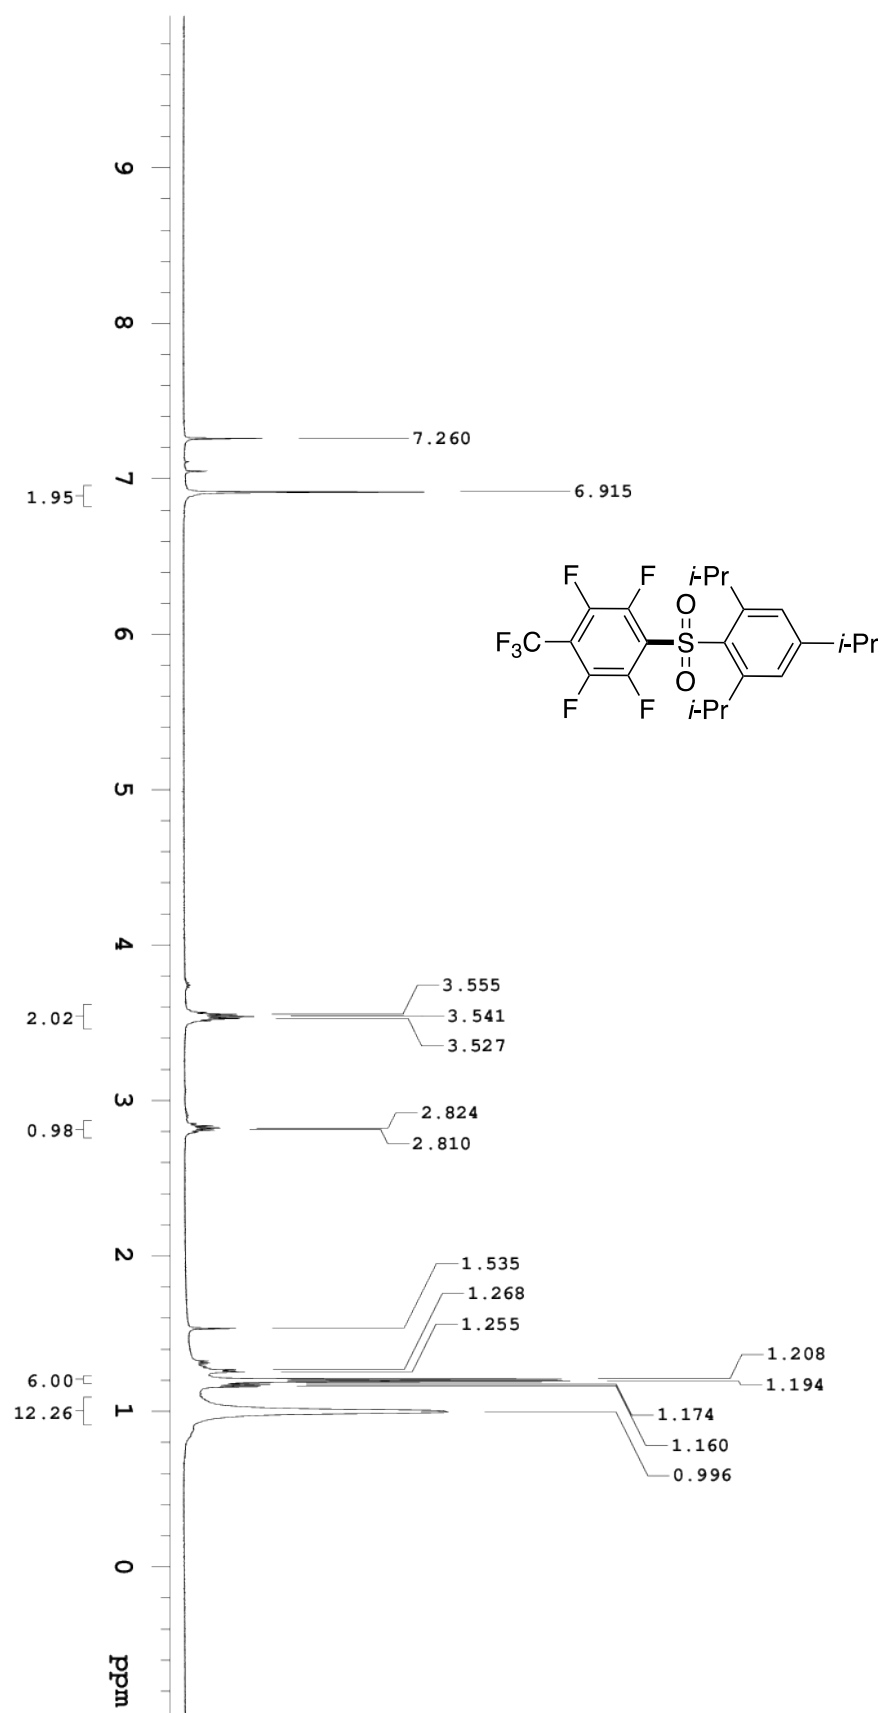

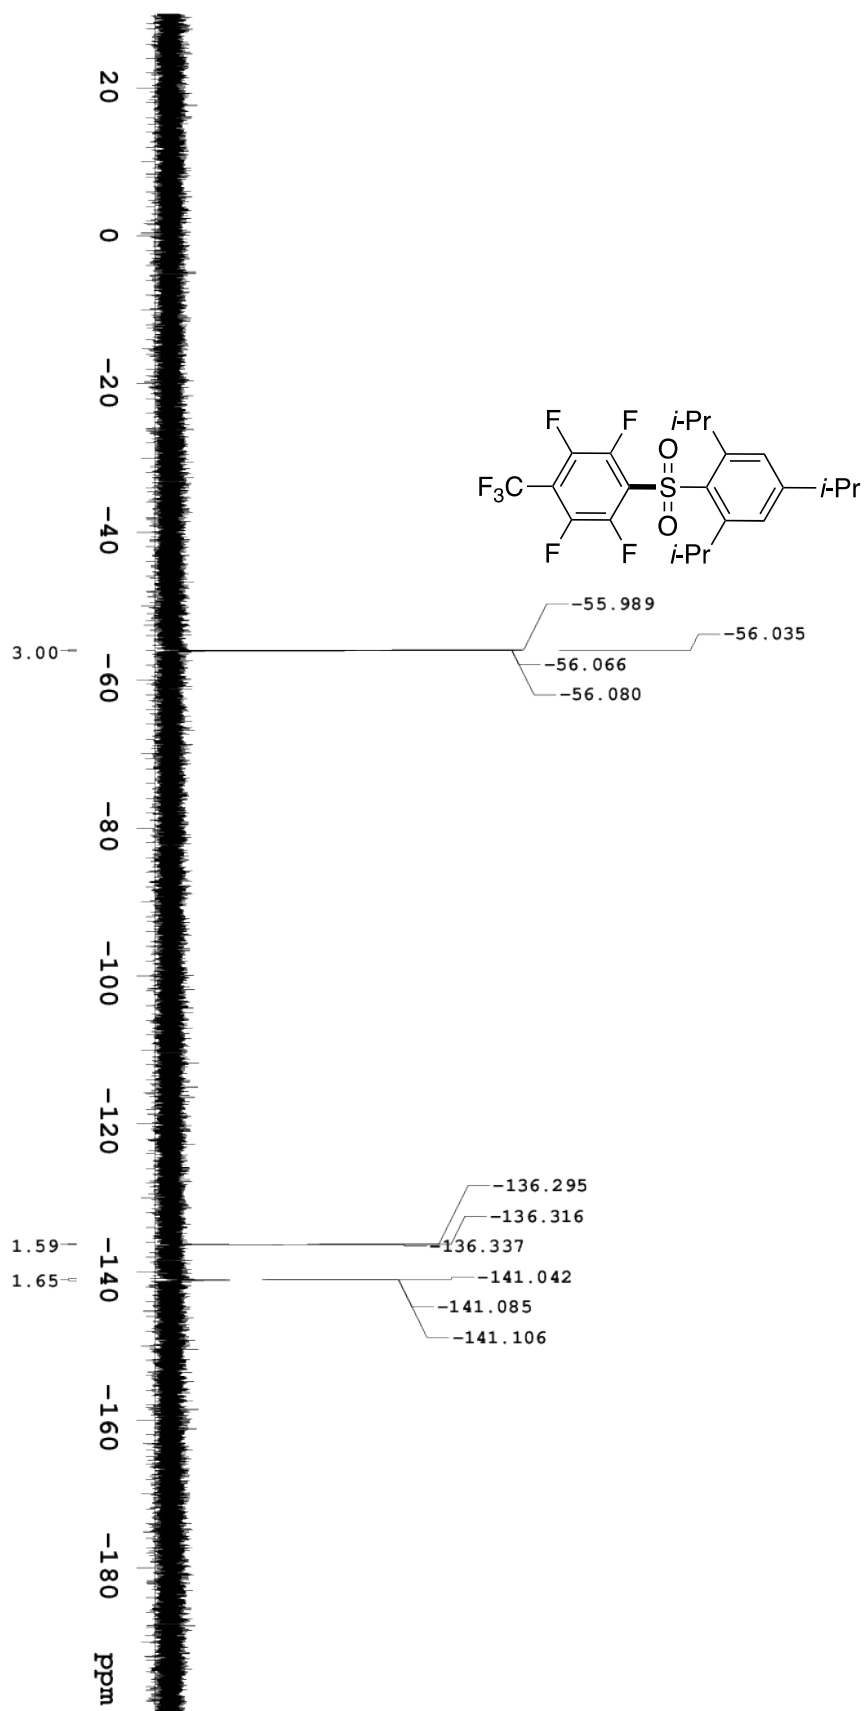

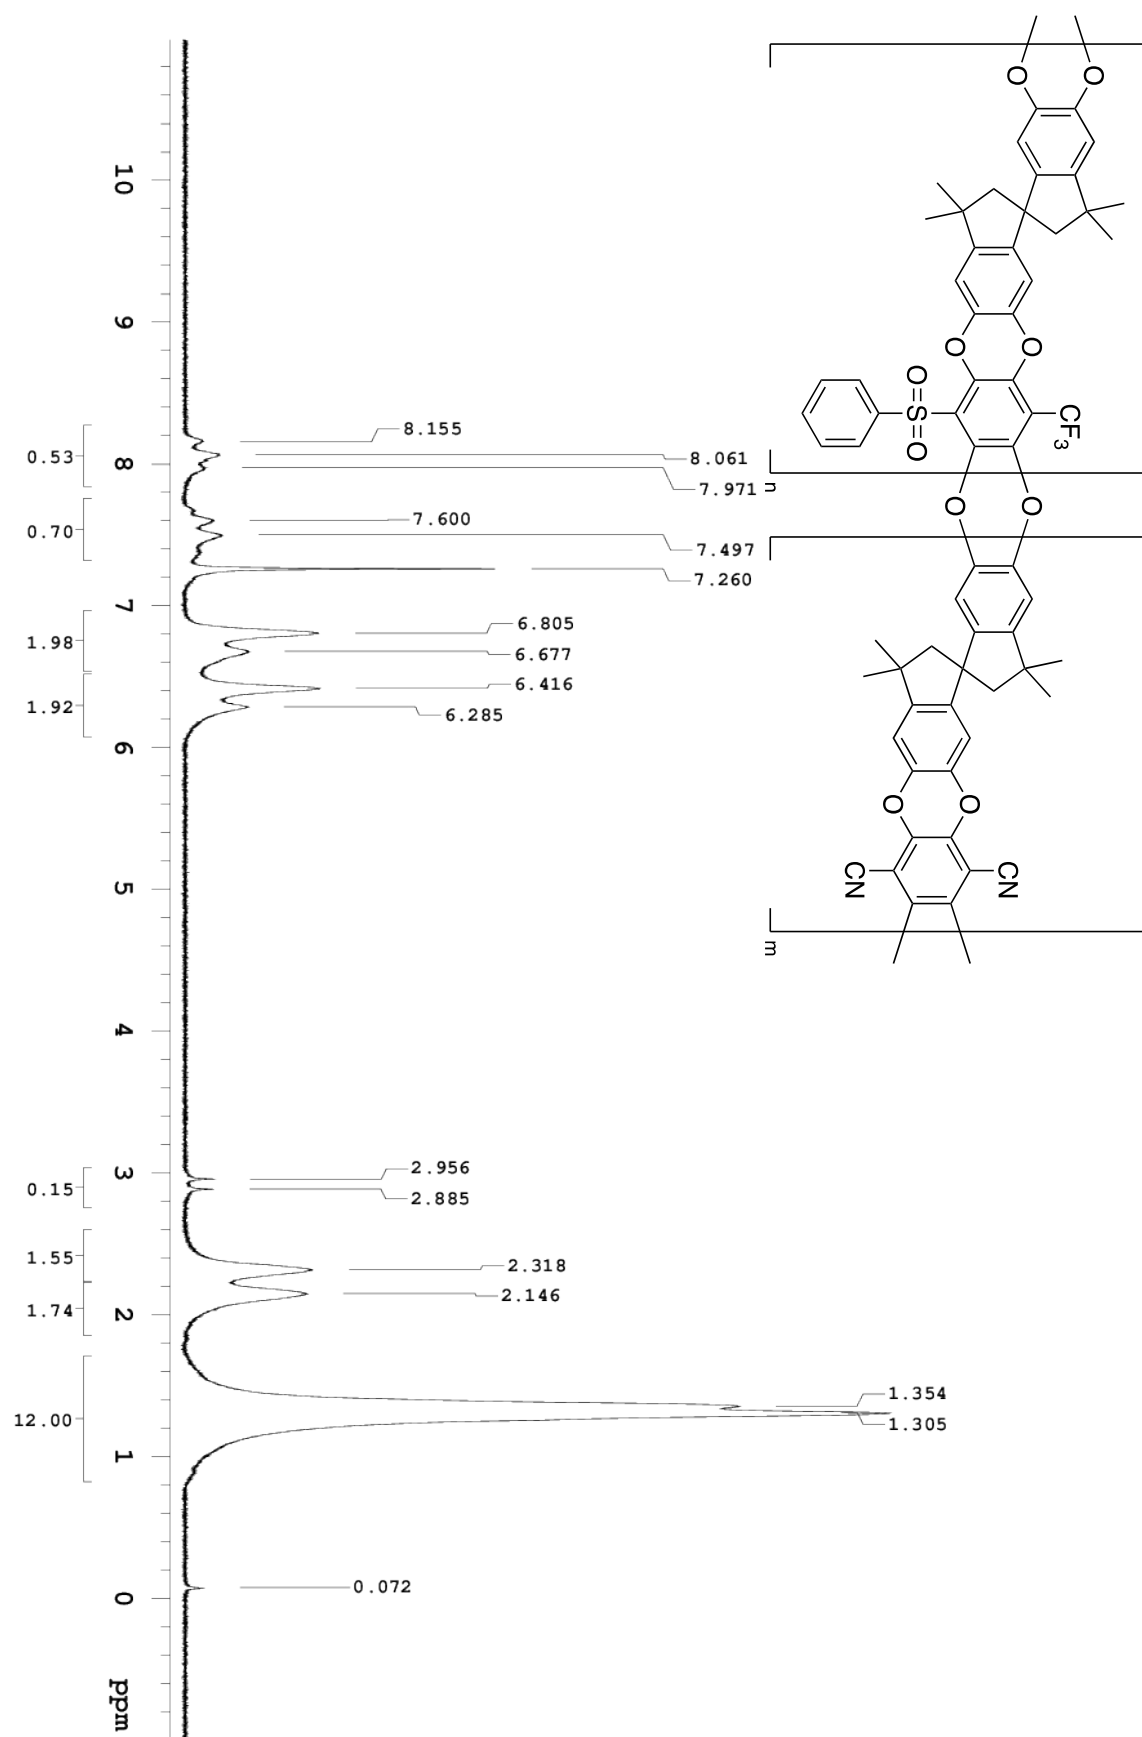

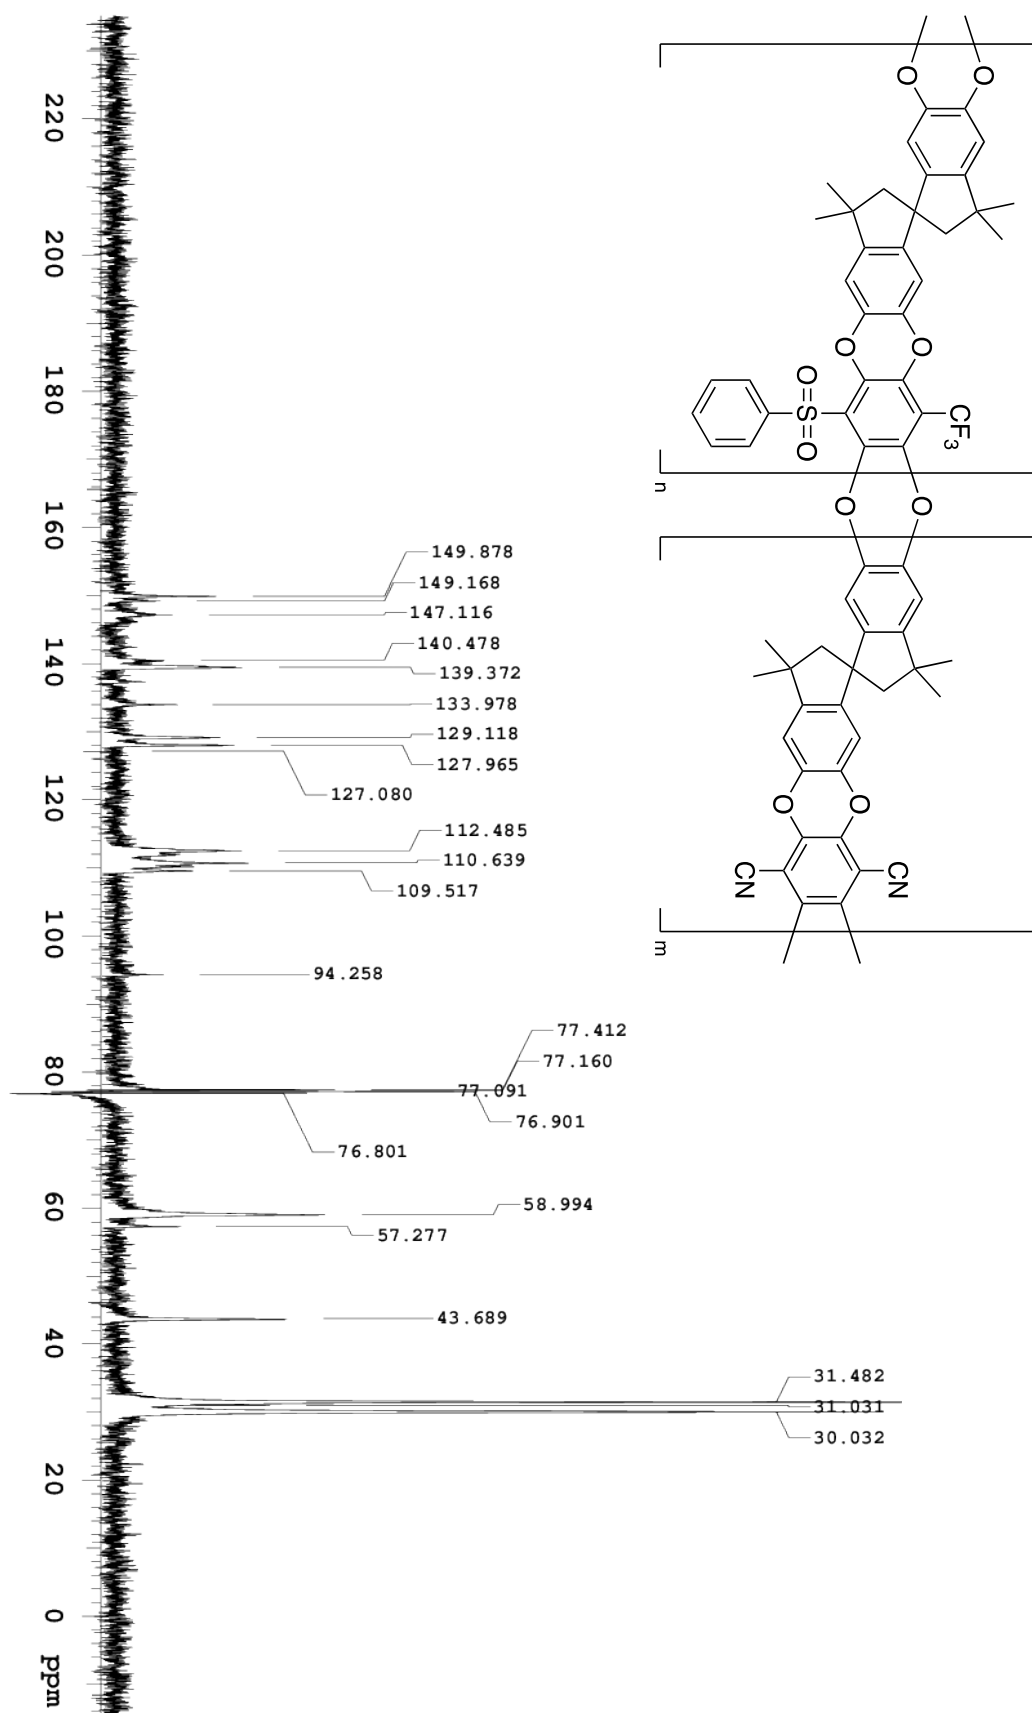

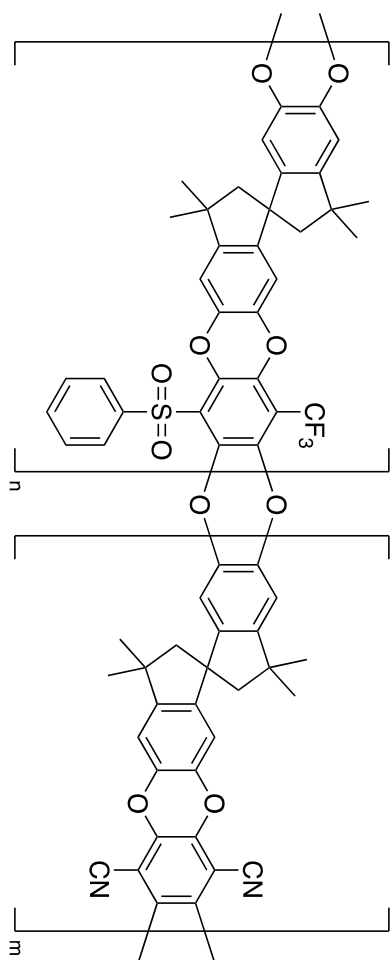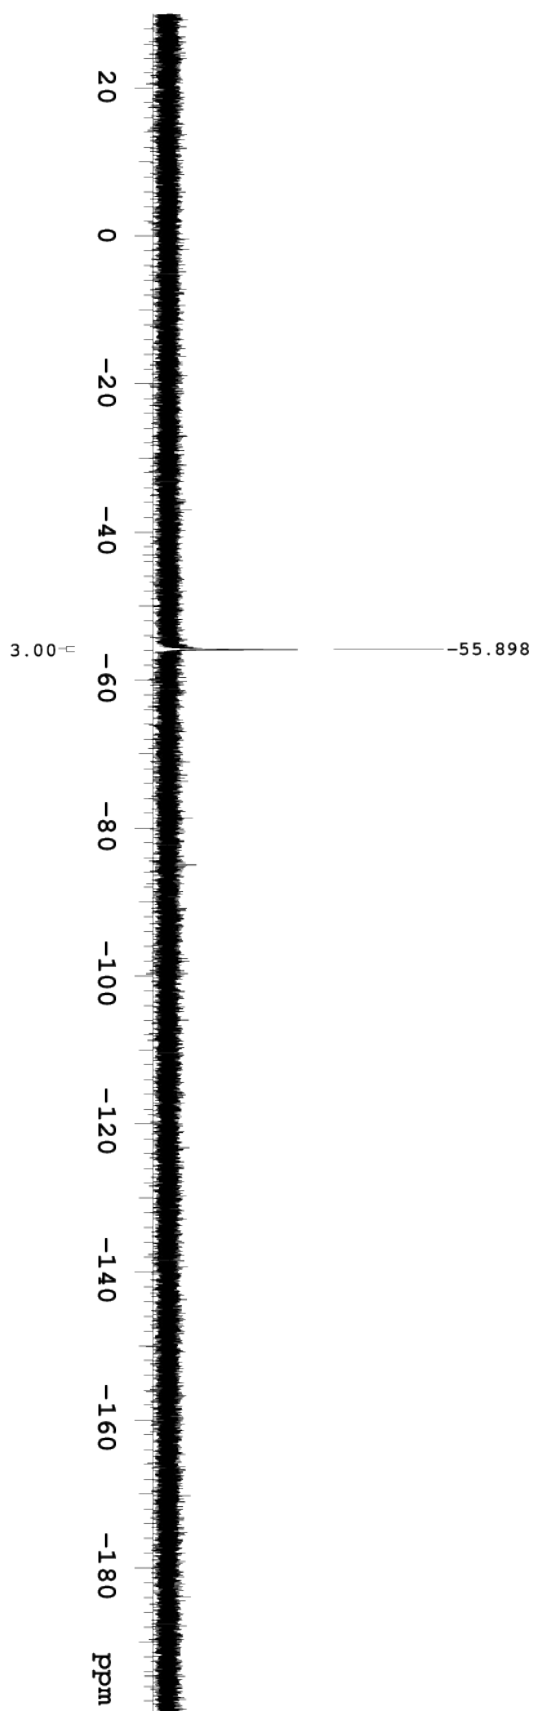

Supplement: c7gc03514d1.pdf [file c7gc03514d1.pdf]
